# Supplementary material for: Gold(I) Carbenoids: On‐Demand Access to Gold(I) Carbenes in Solution
Source: PubMed Central journal article supplement — Angew Chem Int Ed Engl. 2017 Jan 16;56(7):1859–63. doi: 10.1002/anie.201611705 (PMC5324612; doi:10.1002/anie.201611705), 2017-01-16

## Supporting Information

### **Gold(I) Carbenoids: On-Demand Access to Gold(I) Carbenes in Solution**

*Juan M. Sarria Toro, Cristina García-Morales, Mihai Raducan, Ekaterina S. Smirnova, and Antonio M. Echavarren\**

anie\_201611705\_sm\_miscellaneous\_information.pdf

## Supporting Information

|                                                                                                                                                 |           |
|-------------------------------------------------------------------------------------------------------------------------------------------------|-----------|
| <b>1. General information</b> .....                                                                                                             | <b>2</b>  |
| <b>2. Synthesis of gold carbenoid complexes</b> .....                                                                                           | <b>2</b>  |
| 2.1. (Chloromethyl)(2-(di- <i>tert</i> -butylphosphino)biphenyl)gold ( <b>1a</b> ) .....                                                        | 2         |
| 2.2. (Chloromethyl- <i>d</i> )(2-(di- <i>tert</i> -butylphosphino)biphenyl)gold ( <b>1a-d<sub>1</sub></b> ) .....                               | 3         |
| 2.3. (Chloromethyl)(2-(di- <i>tert</i> -butylphosphino)-2',4',6'-triisopropylbiphenyl)gold ( <b>1b</b> ) .....                                  | 3         |
| 2.4. (Chloromethyl)(1,3-bis(2,6-diisopropylphenyl)imidazole-2-ylidene)gold ( <b>1c</b> ) .....                                                  | 4         |
| 2.5. (Chloromethyl)(tris(2,4-di- <i>tert</i> -butylphenyl)phosphite)gold ( <b>1d</b> ) .....                                                    | 4         |
| 2.6. ((Tetrahydro-1 <i>H</i> -furan-1-ium-1-yl)methyl)(2-(di- <i>tert</i> -butylphosphino)biphenyl)gold hexafluoroantimonate ( <b>8</b> ) ..... | 5         |
| 2.7. (Chloro(phenyl)methyl)(2-(di- <i>tert</i> -butylphosphino)biphenyl)gold ( <b>9</b> ) .....                                                 | 5         |
| <b>3. Activation of carbenoid complexes with chloride scavengers</b> .....                                                                      | <b>6</b>  |
| 3.1. Formation of ethylene .....                                                                                                                | 6         |
| 3.2. Quantification of ethylene .....                                                                                                           | 7         |
| 3.3. Effect of the anion in the decomposition of gold carbenoids .....                                                                          | 11        |
| 3.4. In presence of olefins, formation of cyclopropanes .....                                                                                   | 12        |
| 3.5. In benzene, formation of cycloheptatriene .....                                                                                            | 19        |
| 3.6. Kinetic measurements .....                                                                                                                 | 21        |
| 3.7. Activation of complex <b>9</b> .....                                                                                                       | 23        |
| <b>4. X-Ray crystallography</b> .....                                                                                                           | <b>30</b> |
| 4.1. Analysis of previously reported structures featuring a [MCH <sub>2</sub> Cl] motif as per May 2016. 30                                     |           |
| 4.2. Crystal data and structure refinement for complex <b>1a</b> .....                                                                          | 32        |
| 4.3. Crystal data and structure refinement for complex <b>1b</b> .....                                                                          | 33        |
| 4.4. Crystal data and structure refinement for complex <b>1c</b> .....                                                                          | 34        |
| 4.5. Crystal data and structure refinement for complex <b>8</b> .....                                                                           | 35        |
| 4.6. Crystal data and structure refinement for complex <b>9</b> .....                                                                           | 36        |
| <b>5. DFT calculations</b> .....                                                                                                                | <b>37</b> |
| 5.1. Fully dissociative mechanism .....                                                                                                         | 37        |
| 5.2. Concerted cyclopropanation (Simmons-Smith's type TS) .....                                                                                 | 39        |
| 5.3. Cyclopropanation via a reductive elimination from metallacyclobutane structures. ....                                                      | 40        |
| 5.4. Ethylene formation involving a neutral, three-coordinated carbene species .....                                                            | 42        |
| 5.5. Optimized structures of <b>7a</b> and <b>15a</b> .....                                                                                     | 45        |
| <b>7. References</b> .....                                                                                                                      | <b>47</b> |
| <b>8. NMR spectra</b> .....                                                                                                                     | <b>48</b> |
| 8.1. (Chloromethyl)(2-(di- <i>tert</i> -butylphosphino)biphenyl)gold ( <b>1a</b> ) .....                                                        | 48        |
| 8.2. (Chloromethyl- <i>d</i> )(2-(di- <i>tert</i> -butylphosphino)biphenyl)gold ( <b>1a-d<sub>1</sub></b> ) .....                               | 51        |
| 8.3. (Chloromethyl)(2-(di- <i>tert</i> -butylphosphino)-2',4',6'-triisopropylbiphenyl)gold ( <b>1b</b> ) .....                                  | 54        |
| 8.4. (Chloromethyl)(1,3-bis(2,6-diisopropylphenyl)imidazole-2-ylidene)gold ( <b>1c</b> ) .....                                                  | 57        |
| 8.5. (Chloromethyl)(tris(2,4-di- <i>tert</i> -butylphenyl)phosphite)gold ( <b>1d</b> ) .....                                                    | 59        |
| 8.6. ((Tetrahydro-1 <i>H</i> -furan-1-ium-1-yl)methyl)(2-(di- <i>tert</i> -butylphosphino)biphenyl)gold hexafluoroantimonate ( <b>8</b> ) ..... | 62        |
| 8.7. (Chloro(phenyl)methyl)(2-(di- <i>tert</i> -butylphosphino)biphenyl)gold ( <b>9</b> ) .....                                                 | 65        |
| <b>9. Mass spectrometry</b> .....                                                                                                               | <b>68</b> |
| 9.1. ESI-MS spectra of <b>1a</b> .....                                                                                                          | 68        |

## 1. General information

All reactions under a N<sub>2</sub> atmosphere were conducted after preparation in the glove box, reactions carried out under Ar atmosphere were performed using standard Schlenk techniques. Anhydrous solvents for synthesis were obtained by passing them through an activated alumina column on a PureSolv<sup>TM</sup> solvent purification system (Innovative Technologies, Inc., MA). Deuterated solvents were purchased from Sigma-Aldrich and, unless otherwise stated, distilled over a suitable drying agent<sup>[1]</sup> (Benzene-*d*<sub>6</sub>, Toluene-*d*<sub>8</sub> and THF-*d*<sub>8</sub> over molten K, CD<sub>2</sub>Cl<sub>2</sub> and DCCl<sub>3</sub> over CaH<sub>2</sub>) under Ar before use. Analytical TLC was performed on precoated neutral aluminum oxide plates (0.2 mm thick, Gf234, Merck, Germany) and observed under UV light. Column chromatography was performed on neutral aluminum oxide Carlo Erba. NMR spectra were recorded either on a Bruker Avance 300, 400 or 500 Ultrashield instruments. Chemical shifts are reported in parts per million and referenced to residual solvent. Coupling constants (*J*) are reported in hertz (Hz). Mass spectra were recorded on a Water LCT Premier Spectrometer (ESI and APCI), on an Autoflex Bruker Daltonics (MALDI and LDI), or on an AgilentMSD-5975B (GC-MS).

2-(Di-*tert*-butylphosphino)biphenyl gold(I) chloride, 2-Di-*tert*-butylphosphino-2',4',6'-triisopropylbiphenyl gold(I) chloride, 1,3-Bis(2,6-diisopropylphenyl-imidazol-2-ylidene)gold(I) chloride, (Trimethylsilyl)diazomethane (TMSCHN<sub>2</sub>) (2M in hexanes), Silver hexafluoroantimonate(VI), Silver bis(trifluoromethanesulfonyl)imide, Trimethylsilyl trifluoromethanesulfonate (TMSOTf), Trimethylsilyl trifluoroacetate (TMSO<sub>2</sub>CCF<sub>3</sub>), Trimethylsilyl methanesulfonate (TMSOSO<sub>2</sub>CH<sub>3</sub>) and Norbornene were purchased from Sigma-Aldrich and used without further purification. Trimethylsilyl bis(trifluoromethanesulfonyl)imide (TMSNTf<sub>2</sub>) was purchased from TCI and used without further purification. Cyclohexene was purchased from Acros and used without further purification.

Unless otherwise stated, all other reagents were purchased from commercial sources and used without further purification.

## 2. Synthesis of gold carbenoid complexes

### General Procedure

A solution of TMSCHN<sub>2</sub> (2 M in hexane, 1 to 2 equiv.) was added to a solution of gold chloride complex (1 equiv.) and MeOH (6 equiv.) in anhydrous C<sub>6</sub>H<sub>6</sub> (6 mL). After a few seconds, N<sub>2</sub> evolution started and it stopped after 30 min. The mixture was filtered through a small pad of silica gel in order to quench the excess TMSCHN<sub>2</sub> and rinsed three times with 2 mL of CH<sub>2</sub>Cl<sub>2</sub>. After evaporation of the volatiles in a rotary evaporator the complexes were purified by either recrystallization or column chromatography on neutral aluminum oxide. Single crystals suitable for XRay diffraction were obtained by slow diffusion of pentane into a solution of the pure carbenoid compounds in CH<sub>2</sub>Cl<sub>2</sub>.

### 2.1. (Chloromethyl)(2-(di-*tert*-butylphosphino)biphenyl)gold (**1a**)

2-(Di-*tert*-butylphosphino)biphenyl gold(I) chloride (200 mg, 0.377 mmol), MeOH (91 μL, 2.26 mmol) and TMSCHN<sub>2</sub> (0.226 mL, 0.452 mmol) were used. Complex **1a** was purified by column chromatography on neutral aluminum oxide using a pentane/CH<sub>2</sub>Cl<sub>2</sub>/acetonitrile (100:10:2) mixture as eluent. Yield: 120 mg (58.5 %) of **1a** as a white solid.

$^1\text{H}$  NMR (400 MHz,  $\text{CD}_2\text{Cl}_2$ )  $\delta$  7.91 – 7.86 (m, 1H,  $\text{H}_{\text{arom}}$ ), 7.52 – 7.44 (m, 2H,  $\text{H}_{\text{arom}}$ ), 7.42 – 7.35 (m, 3H,  $\text{H}_{\text{arom}}$ ), 7.26 – 7.22 (m, 1H,  $\text{H}_{\text{arom}}$ ), 7.18 – 7.14 (m, 2H,  $\text{H}_{\text{arom}}$ ), 2.96 (d,  $J_{\text{H-P}} = 3.6$  Hz, 2H,  $\text{CH}_2\text{Cl}$ ), 1.39 (d,  $J_{\text{H-P}} = 14.5$  Hz, 18H,  $\text{PC}(\text{CH}_3)_3$ ).

$^{31}\text{P}$  NMR (162 MHz,  $\text{CD}_2\text{Cl}_2$ )  $\delta$  68.29 (s).

$^{13}\text{C}$  NMR (101 MHz,  $\text{CD}_2\text{Cl}_2$ )  $\delta$  150.67 (d,  $J_{\text{C-P}} = 16.2$  Hz,  $\text{C}_{\text{arom}}$ ), 143.98 (d,  $J_{\text{C-P}} = 5.6$  Hz,  $\text{C}_{\text{arom}}$ ), 135.58 (s,  $\text{C}_{\text{arom}}$ ), 133.27 (d,  $J_{\text{C-P}} = 7.6$  Hz,  $\text{C}_{\text{arom}}$ ), 130.56 (d,  $J_{\text{C-P}} = 2.2$  Hz,  $\text{C}_{\text{arom}}$ ), 130.08 (s,  $\text{C}_{\text{arom}}$ ), 129.22 (d,  $J_{\text{C-P}} = 33.5$  Hz,  $\text{C}_{\text{arom}}$ ), 128.63 (s,  $\text{C}_{\text{arom}}$ ), 127.43 (s,  $\text{C}_{\text{arom}}$ ), 127.17 (d,  $J_{\text{C-P}} = 5.3$  Hz,  $\text{C}_{\text{arom}}$ ), 53.58 (d,  $J_{\text{C-P}} = 112.6$  Hz,  $\text{AuCH}_2\text{Cl}$ ), 37.63 (d,  $J_{\text{C-P}} = 19.7$  Hz,  $\text{PC}(\text{CH}_3)_3$ ), 31.31 (d,  $J_{\text{C-P}} = 7.0$  Hz,  $\text{PC}(\text{CH}_3)_3$ ).

**HRMS** (ESI+) Calcd. for  $\text{C}_{21}\text{H}_{29}\text{AuPClNa}$   $[\text{M}+\text{Na}]^+$ : 567.1253 Found: 567.1274.

Anal. Calcd. for  $\text{C}_{21}\text{H}_{29}\text{AuClP}$ : C, 46.29; H, 5.37. Found: C, 46.23; H, 5.21.

## 2.2. (Chloromethyl-*d*)(2-(di-*tert*-butylphosphino)biphenyl)gold (**1a-d<sub>1</sub>**)

2-(Di-*tert*-butylphosphino)biphenyl gold(I) chloride (200 mg, 0.377 mmol),  $\text{CD}_3\text{OD}$  (91  $\mu\text{L}$ , 2.26 mmol) and  $\text{TMSCHN}_2$  (0.226 mL, 0.452 mmol) were used. Complex **1a-d<sub>1</sub>** was purified by column chromatography on neutral aluminum oxide using a pentane/ $\text{CH}_2\text{Cl}_2$ /acetonitrile (100:10:2) mixture as eluent. Yield: 113 mg (54.9%) of **1a-d<sub>1</sub>** as a white crystalline solid.

$^1\text{H}$  NMR (400 MHz  $\text{CD}_2\text{Cl}_2$ )  $\delta$  7.91 – 7.85 (m, 1H,  $\text{H}_{\text{arom}}$ ), 7.52 – 7.43 (m, 2H,  $\text{H}_{\text{arom}}$ ), 7.42 – 7.36 (m, 3H,  $\text{H}_{\text{arom}}$ ), 7.26 – 7.22 (m, 1H,  $\text{H}_{\text{arom}}$ ), 7.19 – 7.13 (m, 2H,  $\text{H}_{\text{arom}}$ ), 2.96 (d,  $J_{\text{H-P}} = 3.6$  Hz, 2H,  $\text{AuCH}_2\text{Cl}$ ), 2.94 (dt,  $J_{\text{H-P}} = 3.2$ ,  $J_{\text{H-D}} = 1.4$  Hz, 1H,  $\text{AuCHDCl}$ ), 1.39 (d,  $J_{\text{H-P}} = 14.5$  Hz, 18H,  $\text{PC}(\text{CH}_3)_3$ ).

$^{31}\text{P}$  NMR (162 MHz,  $\text{CD}_2\text{Cl}_2$ )  $\delta$  68.3.

$^{13}\text{C}$  NMR (101 MHz,  $\text{CD}_2\text{Cl}_2$ )  $\delta$  150.1 (d,  $J_{\text{C-P}} = 16.1$  Hz,  $\text{C}_{\text{arom}}$ ), 143.4 (d,  $J_{\text{C-P}} = 5.7$  Hz,  $\text{C}_{\text{arom}}$ ), 135.0, 132.7 (d,  $J_{\text{C-P}} = 7.7$  Hz,  $\text{C}_{\text{arom}}$ ), 130.0 (d,  $J_{\text{C-P}} = 2.2$  Hz,  $\text{C}_{\text{arom}}$ ), 129.5, 128.6 (d,  $J_{\text{C-P}} = 33.6$  Hz,  $\text{C}_{\text{arom}}$ ), 128.0, 126.8, 126.6 (d,  $J_{\text{C-P}} = 5.3$  Hz,  $\text{C}_{\text{arom}}$ ), 53.0 (d,  $J_{\text{C-P}} = 112.7$  Hz,  $\text{AuCH}_2\text{Cl}$ ), 52.9 (dt,  $J_{\text{C-P}} = \text{overlapping}$ ,  $J_{\text{C-D}} = 21.8$  Hz,  $\text{AuCHDCl}$ ) (d,  $J_{\text{C-P}} = 19.6$  Hz,  $\text{C}(\text{CH}_3)_3$ ), 30.7 (d,  $J_{\text{C-P}} = 7.0$  Hz,  $\text{C}(\text{CH}_3)_3$ ).

## 2.3. (Chloromethyl)(2-(di-*tert*-butylphosphino)-2',4',6'-triisopropylbiphenyl)gold (**1b**)

2-(Di-*tert*-butylphosphino)-2',4',6'-triisopropylbiphenyl gold(I) chloride (197 mg, 0.300 mmol),  $\text{MeOH}$  (73  $\mu\text{L}$ , 1.80 mmol) and  $\text{TMSCHN}_2$  (0.500 mL (0.6 M), 0.300 mmol) were used. Complex **1b** was purified by column chromatography on neutral aluminum oxide using a pentane/ $\text{CH}_2\text{Cl}_2$ /acetonitrile (100:10:2) mixture as eluent. Yield: 112 mg (55.9 %) of **1b** as a white solid.

$^1\text{H}$  NMR (400 MHz,  $\text{CD}_2\text{Cl}_2$ )  $\delta$  7.89 (m, 1H,  $\text{H}_{\text{arom}}$ ), 7.51 – 7.42 (m, 2H,  $\text{H}_{\text{arom}}$ ), 7.22 (m, 1H), 7.05 (m, 2H), 3.03 – 2.86 (m, 1H,  $\text{CH}(\text{CH}_3)_2$ ), 2.94 (d,  $J_{\text{H-P}} = 3.8$  Hz, 2H,  $\text{CH}_2\text{Cl}$ ), 2.40 (hept,  $J_{\text{H-H}} = 6.7$  Hz, 2H,  $\text{CH}(\text{CH}_3)_2$ ), 1.41 (d,  $J_{\text{H-P}} = 14.4$  Hz, 18H,  $\text{PC}(\text{CH}_3)_3$ ), 1.33 (d,  $J_{\text{H-H}} = 6.9$  Hz, 6H,  $\text{CH}(\text{CH}_3)_2$ ), 1.27 (d,  $J_{\text{H-H}} = 6.8$  Hz, 6H,  $\text{CH}(\text{CH}_3)_2$ ), 0.90 (d,  $J_{\text{H-H}} = 6.7$  Hz, 6H,  $\text{CH}(\text{CH}_3)_2$ ).

$^{31}\text{P}$  NMR (162 MHz,  $\text{CD}_2\text{Cl}_2$ )  $\delta$  68.85 (s).

$^{13}\text{C}$  NMR (101 MHz,  $\text{CD}_2\text{Cl}_2$ )  $\delta$  149.3 (s,  $\text{C}_{\text{arom}}$ ), 148.7 (d,  $J_{\text{C-P}} = 16.9$  Hz,  $\text{C}_{\text{arom}}$ ), 147.0 (s,  $\text{C}_{\text{arom}}$ ), 138.2 (d,  $J_{\text{C-P}} = 4.3$  Hz,  $\text{C}_{\text{arom}}$ ), 136.5 (s,  $\text{C}_{\text{arom}}$ ), 135.3 (d,  $J_{\text{C-P}} = 8.4$  Hz,  $\text{C}_{\text{arom}}$ ), 131.6 (d,  $J_{\text{C-P}} = 31.2$  Hz,  $\text{C}_{\text{arom}}$ ), 130.3 (d,  $J_{\text{C-P}} = 2.2$  Hz,  $\text{C}_{\text{arom}}$ ), 126.8 (d,  $J_{\text{C-P}} = 5.4$  Hz,  $\text{C}_{\text{arom}}$ ), 121.8 (s,  $\text{C}_{\text{arom}}$ ), 53.9 (d,  $J_{\text{C-P}} = 112.5$  Hz,  $\text{CH}_2\text{Cl}$ ), 38.3 (d,  $J_{\text{C-P}} = 20.1$  Hz,  $\text{PC}(\text{CH}_3)_3$ ), 34.7 (s,  $\text{CH}(\text{CH}_3)_2$ ), 31.8 (d,  $J_{\text{C-P}} = 6.8$  Hz,  $\text{PC}(\text{CH}_3)_3$ ), 31.4 (s,  $\text{CH}(\text{CH}_3)_2$ ), 26.4 (s,  $\text{CH}(\text{CH}_3)_2$ ), 24.6 (s,  $\text{CH}(\text{CH}_3)_2$ ), 23.3 (s,  $\text{CH}(\text{CH}_3)_2$ ).

**HRMS** (ESI+) Calcd. for  $\text{C}_{30}\text{H}_{47}\text{AuPClNa}$  [ $\text{M}+\text{Na}$ ] $^+$ : 693.2662 Found: 693.2688.

Anal. Calcd. for  $\text{C}_{30}\text{H}_{47}\text{AuClP}$ : C, 53.69; H, 7.06. Found: C, 53.69; H, 6.96.

#### 2.4. (Chloromethyl)(1,3-bis(2,6-diisopropylphenyl)imidazole-2-ylidene)gold (**1c**)

1,3-bis(2,6-diisopropylphenyl)imidazole-2-ylidene gold(I) chloride (300 mg, 0.483 mmol), MeOH (117  $\mu\text{L}$ , 2.90 mmol) and  $\text{TMSCHN}_2$  (531  $\mu\text{L}$  (2 M), 1.063 mmol) were used. Complex **3** was purified by column chromatography on neutral aluminum oxide using a pentane/EtOAc/acetonitrile (10:1:0.5) mixture as eluent. Yield: 180 mg (58.7 %) of **1c** as a white solid.

$^1\text{H}$  NMR (300 MHz,  $\text{CD}_2\text{Cl}_2$ )  $\delta$  7.54 (t,  $J_{\text{H-H}} = 7.7$  Hz, 2H,  $\text{H}_{\text{arom}}$ ), 7.34 (d,  $J_{\text{H-H}} = 7.7$  Hz, 4H,  $\text{H}_{\text{arom}}$ ), 7.16 (s, 2H,  $\text{H}_{\text{imid}}$ ), 3.34 (s, 2H,  $\text{CH}_2\text{Cl}$ ), 2.60 (hept,  $J_{\text{H-H}} = 7.0$  Hz, 4H,  $\text{CH}(\text{CH}_3)_2$ ), 1.34 (d,  $J_{\text{H-H}} = 6.9$  Hz, 12H,  $\text{CH}(\text{CH}_3)_2$ ), 1.22 (d,  $J_{\text{H-H}} = 6.9$  Hz, 12H,  $\text{CH}(\text{CH}_3)_2$ ).

$^{13}\text{C}$  NMR (101 MHz,  $\text{CD}_2\text{Cl}_2$ )  $\delta$  195.2 (s, C-Au), 146.5 (s,  $\text{C}_{\text{arom}}$ ), 135.1 (s,  $\text{C}_{\text{arom}}$ ), 130.8 (s,  $\text{C}_{\text{arom}}$ ), 124.5 (s,  $\text{C}_{\text{arom}}$ ), 123.6 (s,  $\text{C}_{\text{imid}}$ ), 47.2 (s,  $\text{CH}_2\text{Cl}$ ), 29.3 (s,  $\text{CH}(\text{CH}_3)_2$ ), 24.7 (s,  $\text{CH}(\text{CH}_3)_2$ ), 24.2 (s,  $\text{CH}(\text{CH}_3)_2$ ).

**HRMS** (ESI+) Calcd. for  $\text{C}_{28}\text{H}_{39}\text{AuClN}_2$  [ $\text{M}+\text{H}$ ] $^+$ : 635.2462 Found: 635.2475.

Anal. Calcd. for  $\text{C}_{28}\text{H}_{38}\text{AuClN}_2$ : C, 52.96; H, 6.03; N, 4.41. Found: C, 52.88; H, 6.09; N, 4.24.

#### 2.5. (Chloromethyl)(tris(2,4-di-*tert*-butylphenyl)phosphite)gold (**1d**)

Tris(2,4-di-*tert*-butylphenyl)phosphite gold(I) chloride (300 mg, 0.341 mmol), MeOH (83  $\mu\text{L}$ , 2.05 mmol) and  $\text{TMSCHN}_2$  (341  $\mu\text{L}$  (2 M), 0.682 mmol) were used. Complex **1d** could not be purified by conventional means as it would immediately decompose in the column. After  $\text{TMSCHN}_2$  was consumed (as evidenced by the disappearance of the yellow color) the solvents were removed under reduced pressure and the residue redissolved in anhydrous  $\text{Et}_2\text{O}$  (2 mL) and filtered through 2 HPLC filters into a Schlenk flask. Anhydrous *n*-hexane (5 mL) were added over the solution and the solvents removed under vacuum. The off-white solid thus obtained was used without further purification.

$^1\text{H}$  NMR (500 MHz,  $\text{CD}_2\text{Cl}_2$ )  $\delta$  7.49 (dd,  $J_{\text{H,H}} = 8.5, 1.5$  Hz, 3 $\text{H}_{\text{arom}}$ ), 7.46 (dd,  $J_{\text{H,H}} = 2.6, 1.1$  Hz, 3 $\text{H}_{\text{arom}}$ ), 7.17 (dd,  $J_{\text{H,H}} = 8.5, 2.6$  Hz, 3 $\text{H}_{\text{arom}}$ ), 3.62 (d,  $J_{\text{H,P}} = 5.7$  Hz, 2H,  $\text{CH}_2\text{Cl}$ ), 1.45 (s, 27H,  $\text{C}(\text{CH}_3)_3$ ), 1.30 (s, 27H,  $\text{C}(\text{CH}_3)_3$ ).

$^{31}\text{P}$  NMR (202 MHz,  $\text{CD}_2\text{Cl}_2$ )  $\delta$  143.2 (s).

$^{13}\text{C}$  NMR (126 MHz,  $\text{CD}_2\text{Cl}_2$ )  $\delta$  148.4 (s,  $\text{C}_{\text{arom}}$ ), 148.1 (d,  $J_{\text{C,P}} = 5.1$  Hz,  $\text{C}_{\text{arom}}$ ), 139.7 (d,  $J_{\text{C,P}} = 5.8$  Hz), 125.9 (s,  $\text{C}_{\text{arom}}$ ), 124.5 (s,  $\text{C}_{\text{arom}}$ ), 119.8 (d,  $J_{\text{C,P}} = 9.5$  Hz,  $\text{C}_{\text{arom}}$ ), 49.1 (d,  $J_{\text{C,P}} = 180.5$  Hz,  $\text{CH}_2\text{Cl}$ ), 35.6 (s,  $\text{C}(\text{CH}_3)_3$ ), 35.1 (s,  $\text{C}(\text{CH}_3)_3$ ), 31.7 (s,  $\text{C}(\text{CH}_3)_3$ ), 30.8 (s,  $\text{C}(\text{CH}_3)_3$ ).

#### 2.6. ((Tetrahydro-1*H*-furan-1-ium-1-yl)methyl)(2-(di-*tert*-butylphosphino)biphenyl)gold hexafluoroantimonate (**8**)

Complex **8** was obtained as the product of an NMR scale experiment as follows: A solution of silver hexafluoroantimonate (16.40 mg, 0.048 mmol) in 0.4 mL of  $\text{CD}_2\text{Cl}_2$  was added to a solution of **1a** (20 mg, 0.037 mmol) and tetrahydrofuran (30.0  $\mu\text{L}$ , 0.367 mmol) in 0.6 mL of  $\text{CD}_2\text{Cl}_2$  contained in an NMR tube at  $-78$  °C. The mixture was well mixed at this temperature and transferred to the NMR instrument. The reaction was monitored by multinuclear NMR as it was warmed up from  $-78$  °C to  $-20$  °C. At this temperature total conversion of **1a** into **8** was observed. Single crystals suitable for X-Ray diffraction were obtained by layering anhydrous *n*-hexane over the previously analyzed sample at  $-20$  °C. After one day crystals suitable for diffraction were found in the NMR tube.

$^1\text{H}$  NMR (500 MHz,  $-20$  °C,  $\text{CD}_2\text{Cl}_2$ )  $\delta$  7.86 (m, 1H,  $\text{H}_{\text{arom}}$ ), 7.55 – 7.48 (m, 2H,  $\text{H}_{\text{arom}}$ ), 7.44 – 7.33 (m, 3H,  $\text{H}_{\text{arom}}$ ), 7.23 (m, 1H,  $\text{H}_{\text{arom}}$ ), 7.19 – 7.13 (m, 2H,  $\text{H}_{\text{arom}}$ ), 4.66 (d,  $J_{\text{H-P}} = 3.5$  Hz, 2H,  $\text{CH}_2(\text{OC}_4\text{H}_8)$ ), 4.34 – 4.26 (m, 4H,  $\text{CH}_2(\text{OC}_4\text{H}_8)$ ), 2.27 – 2.20 (m, 4H,  $\text{CH}_2(\text{OC}_4\text{H}_8)$ ), 1.37 (d,  $J_{\text{H-P}} = 15.0$  Hz, 18H,  $\text{PC}(\text{CH}_3)_3$ ).

$^{31}\text{P}$  NMR (202 MHz,  $-20$  °C,  $\text{CD}_2\text{Cl}_2$ )  $\delta$  64.4 (s).

$^{13}\text{C}$  NMR (126 MHz,  $-20$  °C,  $\text{CD}_2\text{Cl}_2$ )  $\delta$  149.5 (d,  $J_{\text{C-P}} = 15.3$  Hz,  $\text{C}_{\text{arom}}$ ), 143.9 (d,  $J_{\text{C-P}} = 5.8$  Hz,  $\text{C}_{\text{arom}}$ ), 135.1 (s,  $\text{C}_{\text{arom}}$ ), 133.0 (d,  $J_{\text{C-P}} = 7.6$  Hz,  $\text{C}_{\text{arom}}$ ), 130.9 (d,  $J_{\text{C-P}} = 2.3$  Hz,  $\text{C}_{\text{arom}}$ ), 130.0 (s,  $\text{C}_{\text{arom}}$ ), 128.6 (s,  $\text{C}_{\text{arom}}$ ), 127.5 (d,  $J_{\text{C-P}} = 38.8$  Hz,  $\text{C}_{\text{arom}}$ ), 127.5 (d,  $J_{\text{C-P}} = 5.9$  Hz,  $\text{C}_{\text{arom}}$ ), 127.1 (s,  $\text{C}_{\text{arom}}$ ), 116.2 (d,  $J_{\text{C-P}} = 105.0$  Hz,  $\text{CH}_2(\text{OC}_4\text{H}_8)$ ), 87.5 (s,  $\text{CH}_2(\text{OC}_4\text{H}_8)$ ), 37.6 (d,  $J_{\text{C-P}} = 21.6$  Hz,  $\text{PC}(\text{CH}_3)_3$ ), 30.9 (d,  $J_{\text{C-P}} = 6.6$  Hz,  $\text{PC}(\text{CH}_3)_3$ ), 25.0 (s,  $\text{CH}_2(\text{OC}_4\text{H}_8)$ ).

#### 2.7. (Chloro(phenyl)methyl)(2-(di-*tert*-butylphosphino)biphenyl)gold (**9**)

Phenyldiazomethane<sup>[2]</sup> (5 mL solution in benzene, approx. 1.8 mmol) was added directly over 2-(di-*tert*-butylphosphino)biphenyl gold(I) chloride (300 mg, 0.565 mmol) in a 25 mL Schlenk flask under Ar atmosphere (strict exclusion of oxygen and water are essential for the reproducibility of this reaction). The mixture was then stirred at  $35$  °C while reaction progress was monitored by  $^{31}\text{P}$  NMR. Once all the starting material has been consumed the heating was removed and the mixture concentrated to about 1 mL under reduced pressure. (**Attention!** Excess phenyldiazomethane is still present in the mixture, as evidenced by the intense red color, and a risk of explosion exists if all the solvent is removed) Anhydrous *n*-pentane (15 mL) is added over the mixture. The system is cooled down to  $-40$  °C with constant stirring for 30 minutes in order to induce precipitation of the product as a white solid. Filtration of the supernatant is performed with a cannula at  $-40$  °C. The product is washed with two portions of 2.5 mL anhydrous *n*-pentane at  $-40$  °C. The combined supernatant is treated with 1M HCl in MeOH until all the red color of the remaining phenyldiazomethane has faded and then safely discarded. The obtained white solid is dried on the high vacuum overnight at  $0$  °C. Crystals suitable for X-Ray measurement were obtained by storing a solution of complex **9** in a mixture of toluene and pentane in a ratio of about 1:10 in the

freezer (-35 °C) for several days. Due to the handling and final characteristics of the product an accurate determination of the reaction yield is not possible, however conversion is complete as evidenced by  $^{31}\text{P}$  NMR evaluation during the synthesis.

$^1\text{H}$  NMR (400 MHz,  $\text{CD}_2\text{Cl}_2$ )  $\delta$  7.90 – 7.85 (m, 1H,  $\text{H}_{\text{arom}}$ ), 7.57 – 7.36 (m, 4H,  $\text{H}_{\text{arom}}$ ), 7.25 – 7.19 (m, 3H,  $\text{H}_{\text{arom}}$ ), 7.16 (s, 2H,  $\text{H}_{\text{arom}}$ ), 7.15 (s, 2H,  $\text{H}_{\text{arom}}$ ), 7.09 – 7.05 (m, 1H,  $\text{H}_{\text{arom}}$ ), 6.96 (m, 1H,  $\text{H}_{\text{arom}}$ ), 4.04 (d,  $J_{\text{H-P}} = 5.5$  Hz, 1H,  $\text{CHClPh}$ ), 1.42 (d,  $J_{\text{H-P}} = 14.7$  Hz, 9H,  $\text{PC}(\text{CH}_3)_3$ ), 1.30 (d,  $J_{\text{H-P}} = 14.6$  Hz, 9H,  $\text{PC}(\text{CH}_3)_3$ ).

$^{31}\text{P}$  NMR (162 MHz,  $\text{CD}_2\text{Cl}_2$ )  $\delta$  66.38 (s).

$^{13}\text{C}$  NMR (100 MHz,  $\text{CD}_2\text{Cl}_2$ )  $\delta$  151.9 (d,  $J_{\text{C-P}} = 2.6$  Hz,  $\text{C}_{\text{arom}}$ ), 150.7 (d,  $J_{\text{C-P}} = 16.3$  Hz,  $\text{C}_{\text{arom}}$ ), 143.7 (d,  $J_{\text{C-P}} = 5.7$  Hz,  $\text{C}_{\text{arom}}$ ), 135.4 (s,  $\text{C}_{\text{arom}}$ ), 133.3 (d,  $J_{\text{C-P}} = 7.5$  Hz,  $\text{C}_{\text{arom}}$ ), 130.6 (d,  $J_{\text{C-P}} = 2.2$  Hz), 130.1 (s,  $\text{C}_{\text{arom}}$ ), 130.0 (s,  $\text{C}_{\text{arom}}$ ), 128.8 (s,  $\text{C}_{\text{arom}}$ ), 128.7 (d,  $J_{\text{C-P}} = 33.6$  Hz,  $\text{C}_{\text{arom}}$ ), 128.6 (s,  $\text{C}_{\text{arom}}$ ), 128.2 (d,  $J_{\text{C-P}} = 2.4$  Hz,  $\text{C}_{\text{arom}}$ ), 128.0 (s,  $\text{C}_{\text{arom}}$ ), 127.6 (s,  $\text{C}_{\text{arom}}$ ), 127.2 (d,  $J_{\text{C-P}} = 5.3$  Hz,  $\text{C}_{\text{arom}}$ ), 124.3 (s,  $\text{C}_{\text{arom}}$ ), 76.0 (d,  $J_{\text{C-P}} = 105.0$  Hz,  $\text{CHClPh}$ ), 37.6 (d,  $J_{\text{C-P}} = 19.8$  Hz,  $\text{PC}(\text{CH}_3)_3$ ), 37.5 (d,  $J_{\text{C-P}} = 20.0$  Hz,  $\text{PC}(\text{CH}_3)_3$ ), 31.3 (d,  $J_{\text{C-P}} = 7.0$  Hz,  $\text{PC}(\text{CH}_3)_3$ ), 31.1 (d,  $J_{\text{C-P}} = 7.0$  Hz,  $\text{PC}(\text{CH}_3)_3$ ).

### 3. Activation of carbenoid complexes with chloride scavengers

#### 3.1. Formation of ethylene

In a glovebox, 0.018 mmol of carbenoid complex (either 10 mg **1a** or **1a-d<sub>1</sub>**) was dissolved in 0.5 mL toluene- $d_8$  and transferred to a NMR tube capped with a rubber septum. Separately, TMSOTf (0.044 mmol, 8  $\mu\text{L}$ ) was taken in a microsyringe and protected from air. Outside the glovebox TMSOTf was added over the mixture in the NMR tube and the sample transferred to the NMR instrument.

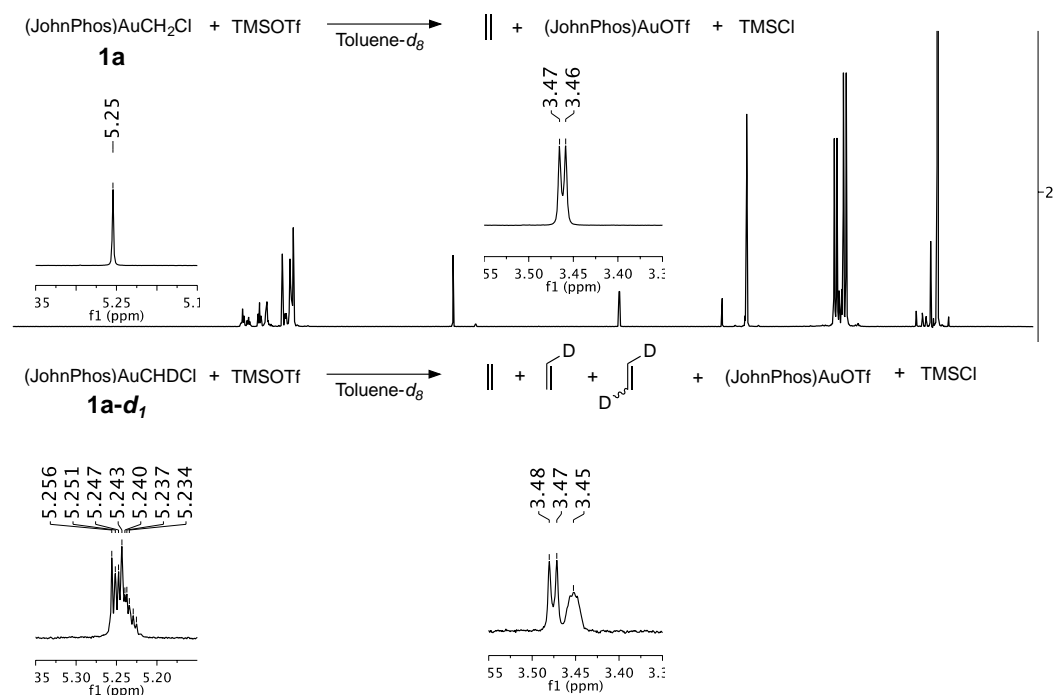

**Figure S1.**  $^1\text{H}$  NMR spectra obtained after activation of complexes **1a** (top) and **1a-d<sub>1</sub>** (bottom) with TMSOTf in toluene- $d_8$ . The inserts show the signals corresponding to the starting carbenoid (around 3.45 ppm) and the formed ethylene (around 5.25 ppm).

### 3.2. Quantification of ethylene

Ethylene formation was quantified using a ManontheMoonTech X102 Gas Evolution device that monitors the gas evolution by measuring the pressure change versus time in closed reaction systems.

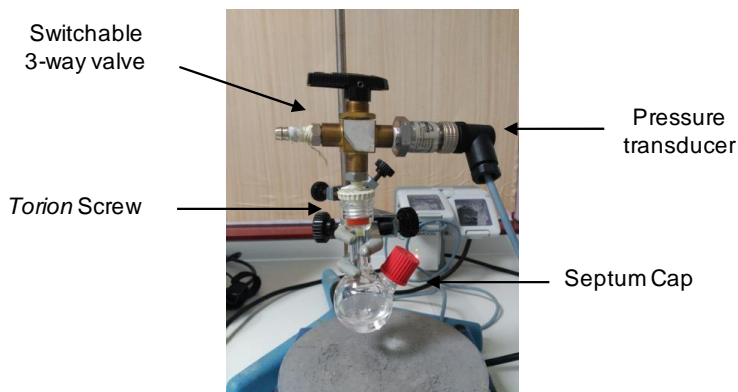

**Figure S2.** ManontheMoonTech X102 reaction flask.

#### Calibration Method

In a glass ampule, toluene was saturated in ethylene by bubbling the gas through anhydrous toluene for 15 minutes. The reaction flask was connected to the switchable 3-way valve via the *Torion* screw and capped with the septum cap. The closed reaction flask was filled with ethylene gas and 5.0 ml of the previously saturated toluene. The reaction flask was connected to the pressure transducer and controlled until the pressure reading stabilized at 0.390-0.400 bar. Separately, a high pressure reactor was charged with 1 bar of ethylene (total pressure = 1 bar + atmospheric pressure) and a known volume of gas was withdrawn using a Hamilton® SampleLock syringe. Ethylene was then injected through the septum cap and the change in pressure was determined. Applying the gas ideal equation SE1, the molar amount  $n$  of added ethylene was calculated which was then correlated to the observed change in pressure  $\Delta P$  (bar).

$$PV = nRT \rightarrow n = \frac{PV}{RT}$$

**Equation SE1.** Ideal gas equation, where:  $P$  = pressure of the gas,  $V$  = volume of the gas,  $n$  = moles of the gas,  $R$  = the ideal gas constant,  $T$  = the absolute temperature of the gas.

**Table S1.** Calibration of the pressure response to ethylene.

| Entry                                  | V <sub>ethylene</sub> (ml) | T (K) | P <sub>ethylene</sub> (bar) | n <sub>ethylene</sub> (mmol) | $\Delta P$ (bar) |
|----------------------------------------|----------------------------|-------|-----------------------------|------------------------------|------------------|
| 1                                      | 2.50                       | 298   | 2                           | 0.2                          | 0.128            |
| 2                                      | 2.50                       | 298   | 2                           | 0.2                          | 0.123            |
| Average: $\Delta P_{0.2 \text{ mmol}}$ |                            |       |                             |                              | 0.125            |
| 3                                      | 1.25                       | 298   | 2                           | 0.1                          | 0.071            |
| 4                                      | 1.25                       | 298   | 2                           | 0.1                          | 0.077            |
| Average: $\Delta P_{0.1 \text{ mmol}}$ |                            |       |                             |                              | 0.074            |



## Ethylene quantification

The reaction flask was filled with toluene (5.0 mL, anhydrous and saturated in ethylene), **1a** and ethylene gas. Then, it was connected to the pressure transducer and controlled until the pressure reading stabilized at 0.390-0.400 bar. TMSOTf (2 equiv) was injected through the septum cap and the pressure change measured over time. The yield of ethylene at any time was calculated using equation SE2.

$$\text{Yield (\%)} = \frac{\Delta P_t}{\Delta P_{\max}} * 100$$

**Equation SE2.** Where:  $\Delta P_t$  = pressure difference along the reaction.  $\Delta P_{\max}$  = maximum pressure change expected given the amount of **1a** used (see calibration).

*Conditions A:* **1a** (0.2 mmol, 109 mg), TMSOTf (0.4 mmol, 72  $\mu$ L),  $\Delta P_{\max}$  = 0.074 bar.

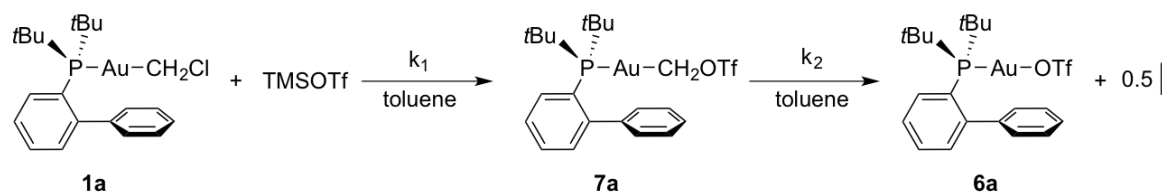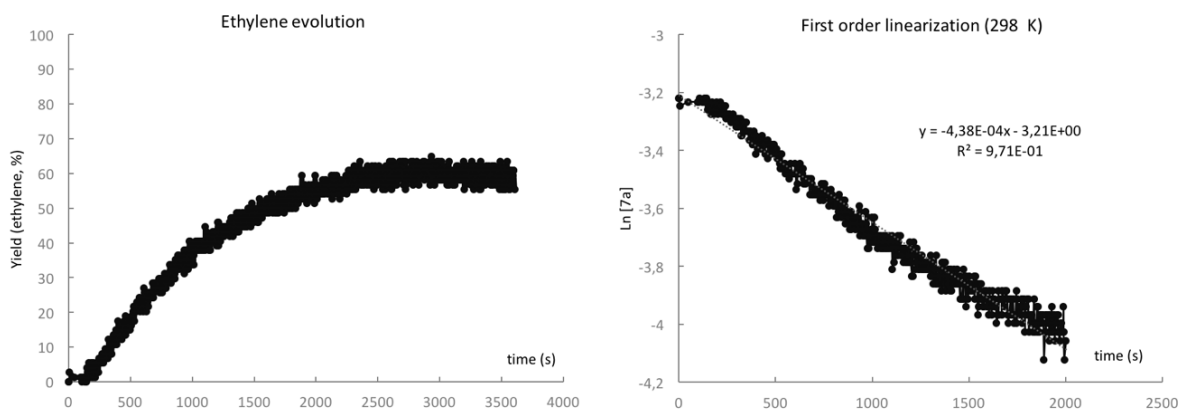

**Figure S3.** Left: yield profile measured for the reaction of **1a** (0.2 mmol) with TMSOTf. Right: corresponding first order linearization plot for the change of concentration of **7a** over time.

Conditions B: **1a** (0.4 mmol, 218 mg), TMSOTf (0.8 mmol, 144  $\mu$ L),  $\Delta P_{\max} = 0.125$  bar.

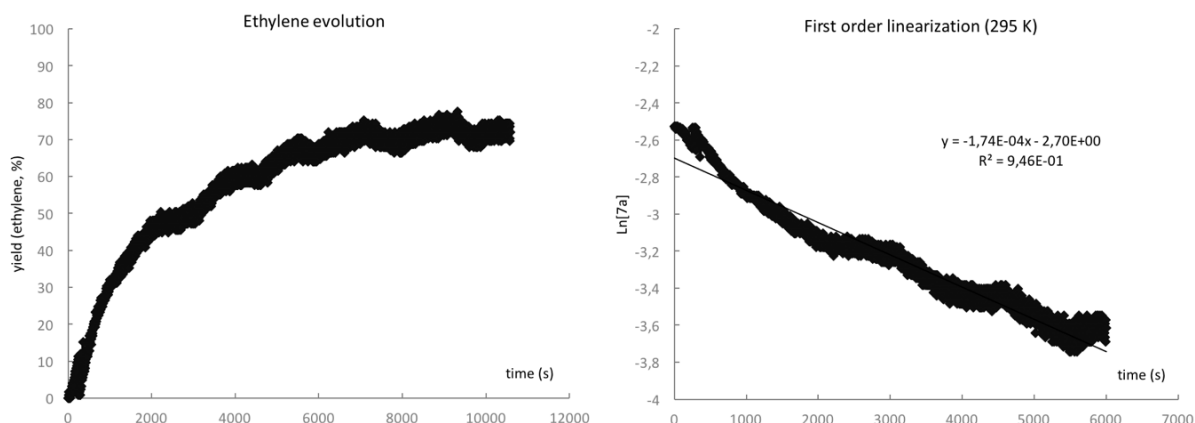

**Figure S4.** Left: yield profile measured for the reaction of **1a** (0.4 mmol) with TMSOTf. Right: corresponding first order linearization plot for the change of concentration of **7a** over time.

#### Gas phase analysis

In a closed reaction flask under argon, carbenoid **1a** (0.03 mmol, 16 mg) was dissolved in 0.5 mL of anhydrous toluene. In a glovebox, TMSOTf (0.06 mmol, 11  $\mu$ L) was taken in a microsyringe and protected from air. Outside the glovebox TMSOTf was added over the solution. The mixture was then stirred at 25°C for 30 minutes. A Hamilton® SampleLock syringe was filled with 250  $\mu$ L of gas from the gas phase of the reaction. The gas was injected in a GC-MS instrument.

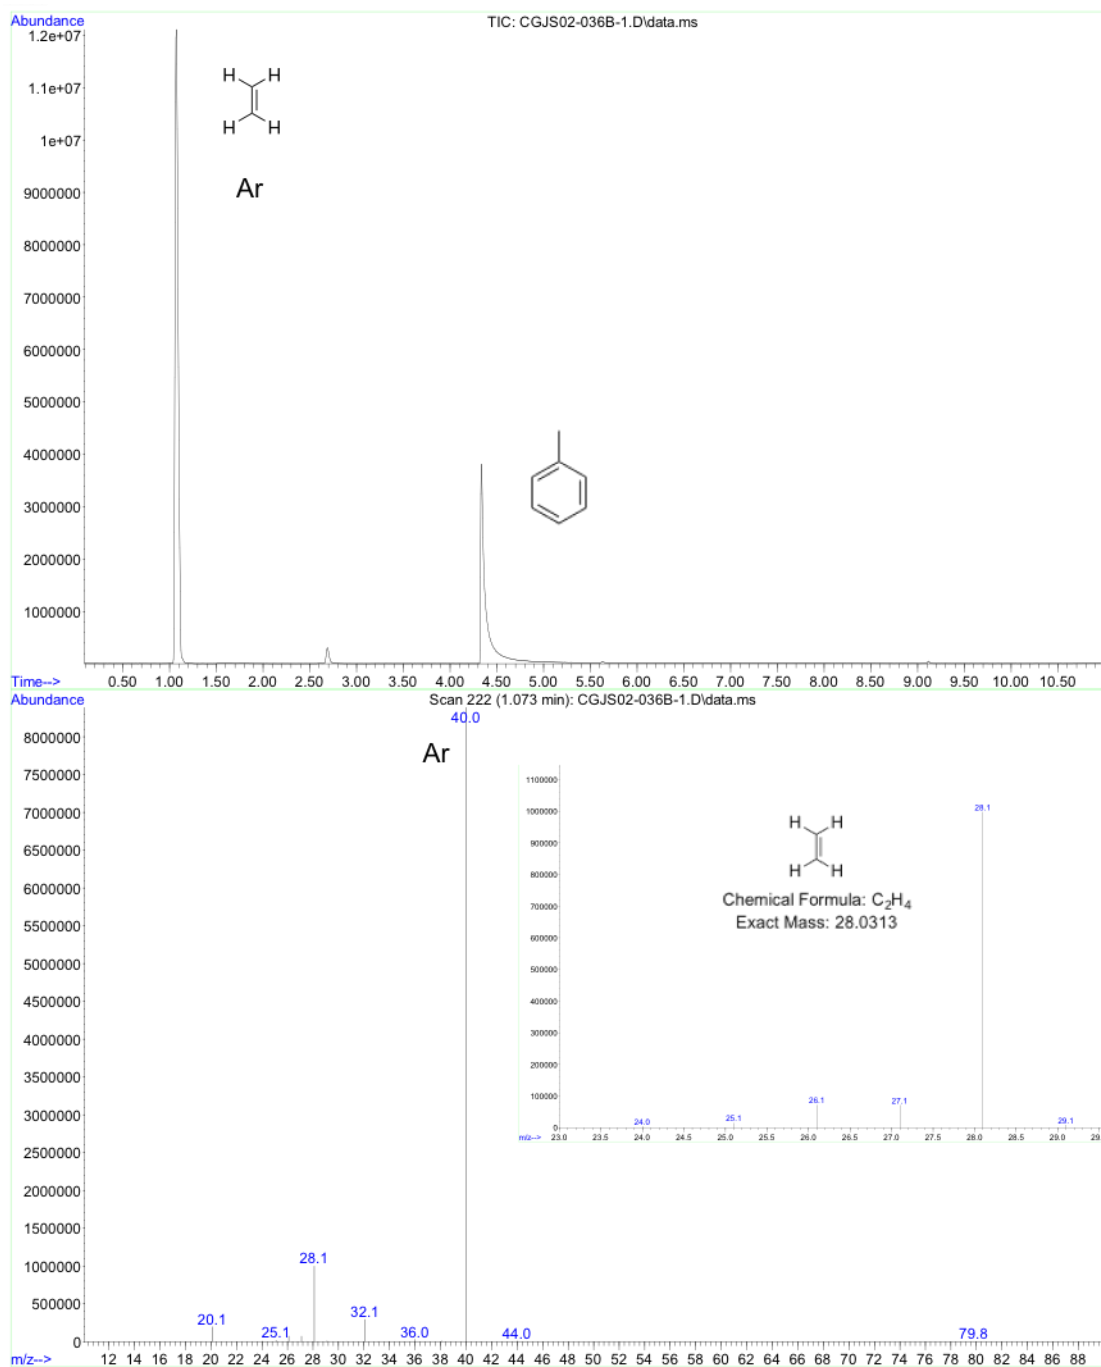

**Figure S5.** GC-MS trace and MS spectrum from the gas phase during the activation of **1a** with TMSOTf.

### 3.3. Effect of the anion in the decomposition of gold carbenoids

In a glovebox, carbenoid complex (0.018 mmol, 10 mg **1a** or 11 mg **1c**) was dissolved in 0.5 mL toluene- $d_8$  and transferred to a NMR tube capped with a rubber septum. Separately, 0.037 mmol of TMS-X compound (either 6.6  $\mu\text{L}$  TMSOTf, 7.7  $\mu\text{L}$  TMSO $_2$ CCF $_3$ , 8.4  $\mu\text{L}$  TMSNTf $_2$ , or 5.7  $\mu\text{L}$  TMSOSO $_2$ CH $_3$ ) was taken in a microsyringe and protected from air. Outside the glovebox TMSOTf was added over the mixture in the NMR tube at room temperature for **1a** or at 273 K for **1c** and the sample transferred to the NMR instrument.

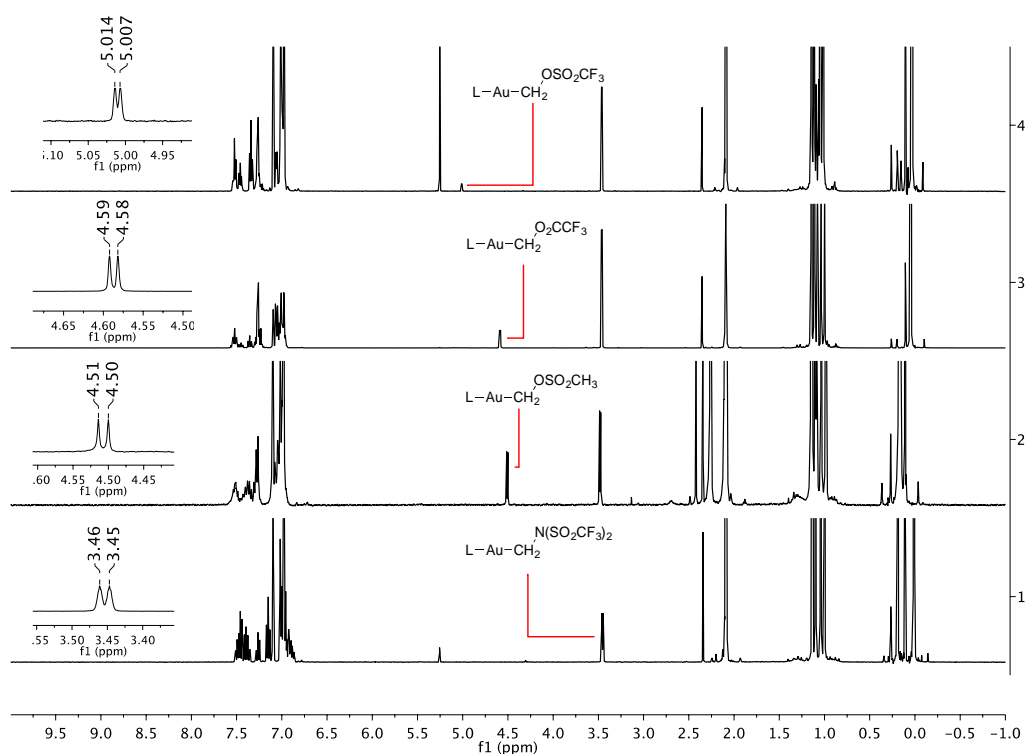

**Figure S6.** Observable intermediates of the type (JohnPhos)AuCH $_2$ X after the activation of complex **1a** with 1) TMSNTf $_2$ , 2) TMSOSO $_2$ CH $_3$ , 3) TMSOCCF $_3$  and 4) TMSOTf in toluene- $d_8$  at room temperature.

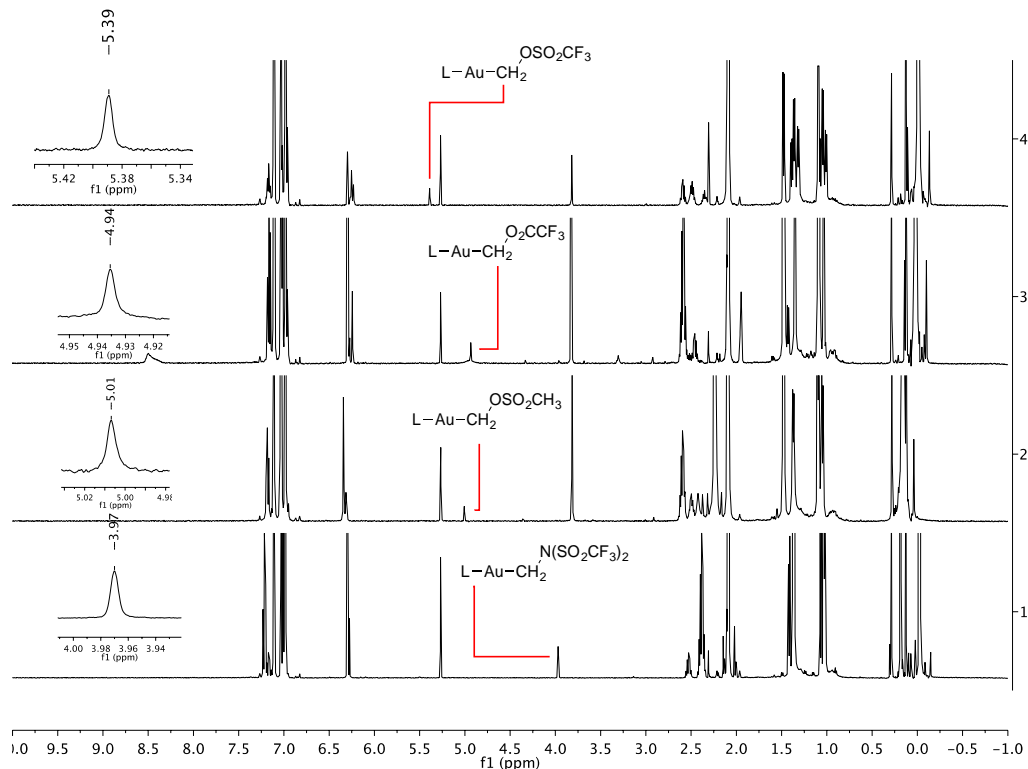

**Figure S7.** Observable intermediates of the type (IPr)AuCH<sub>2</sub>X after the activation of complex **1c** with 1) TMSNTf<sub>2</sub>, 2) TMSOSO<sub>2</sub>CH<sub>3</sub>, 3) TMSOOCF<sub>3</sub> and 4) TMSOTf in toluene-*d*<sub>8</sub> at 273 K.

### 3.4. In presence of olefins, formation of cyclopropanes

General Procedure A, using silver salts:

In a glovebox, 0.017 mmol of carbenoid complex (either 9.3 mg **1a**, 10.5 mg **1c** or 15.2 mg **1d**) was put into a glass vial together with the corresponding olefin (20 equivalents, 0.340 mmol, 34.4  $\mu$ L cyclohexene or 31.1 mg norbornene) and the internal standard 0.018 mmol, 3.0  $\mu$ L diphenylmethane. The mixture was dissolved in 0.5 mL CD<sub>2</sub>Cl<sub>2</sub> and transferred to a NMR tube capped with a rubber septum. Separately 0.020 mmol, 7.9 mg of AgNTf<sub>2</sub> was dissolved in 0.2 mL of toluene-*d*<sub>8</sub> and kept in a 1 mL plastic syringe protected from air. Outside the glovebox in a cooling bath kept at -40 °C the silver solution was added over the mixture in the NMR tube. The tube was shaken and left warming up to room temperature. The yield was calculated by integration of the <sup>1</sup>H NMR signals of the cyclopropanes and the internal standard using equation SE1.

General Procedure B, using TMS compounds:

In a glovebox, 0.017 mmol of carbenoid complex (either 9.3 mg **1a**, 10.5 mg **1c** or 15.2 mg **1d**) was put into a glass vial together with the corresponding olefin (20 equivalents, 0.340 mmol, 34.4  $\mu$ L cyclohexene or 31.1 mg norbornene) and the internal standard 0.018 mmol, 3.0  $\mu$ L diphenylmethane. The mixture was dissolved in 0.5 mL CD<sub>2</sub>Cl<sub>2</sub> and transferred to a NMR tube capped with a rubber septum. Separately 0.035 mmol, 8  $\mu$ L of TMSNTf<sub>2</sub> were taken in a microsyringe protected from air. Outside the glovebox in a cooling bath kept at -80 °C the TMSNTf<sub>2</sub> was added over the mixture in the NMR tube. The tube was shaken and immediately transferred to the NMR instrument where <sup>1</sup>H NMR spectra were measured at temperatures ranging -80 to 25 °C. The yield was calculated by integration of the <sup>1</sup>H NMR

signals of the cyclopropanes and the internal standard at the temperature of maximum yield using equation SE3.

Chemical shifts of the formed cyclopropanes were in agreement to previously reported data.<sup>[3]</sup> Mass spectra obtained from CGMS analysis of the reaction mixtures confirmed formation of the expected products.

$$Yield(\%) = \frac{\left( \frac{N_{I.S.}^H * n_{I.S.} * I_{prod}}{I_{I.S.} * N_{prod.}^H} \right)}{n_{carbenoid}} * 100$$

**Equation SE3.** Where:  $N_{I.S.}^H$  = number of protons corresponding to the integrated signal of the internal standard (for diphenylmethane  $N_{I.S.}^H = 2$ ),  $n_{I.S.}$  = amount of internal standard used (0.017 mmol),  $I_{prod}$  = Measured integral of the product,  $I_{I.S.}$  = Measured integral of the internal standard,  $N_{prod.}^H$  = number of protons corresponding to the integrated signal of the products (for cyclopropanes  $N_{prod.}^H = 1$ , for cycloheptatrienes  $N_{prod.}^H = 2$ ),  $n_{carbenoid}$  = amount of starting carbenoid complex (0.018 mmol).

#### Representative analytical data

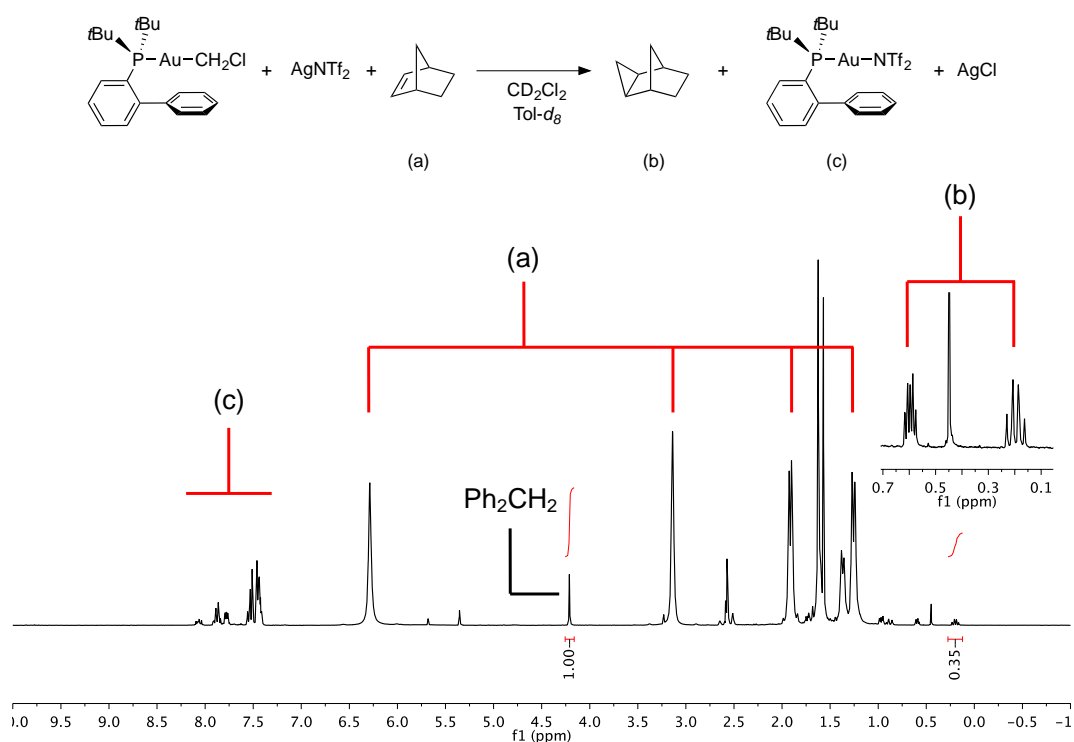

**Figure S8.** Typical <sup>1</sup>H NMR spectrum obtained during the cyclopropanation of norbornene with complex **1a** and AgNTf<sub>2</sub>. Diphenylmethane as internal standard.

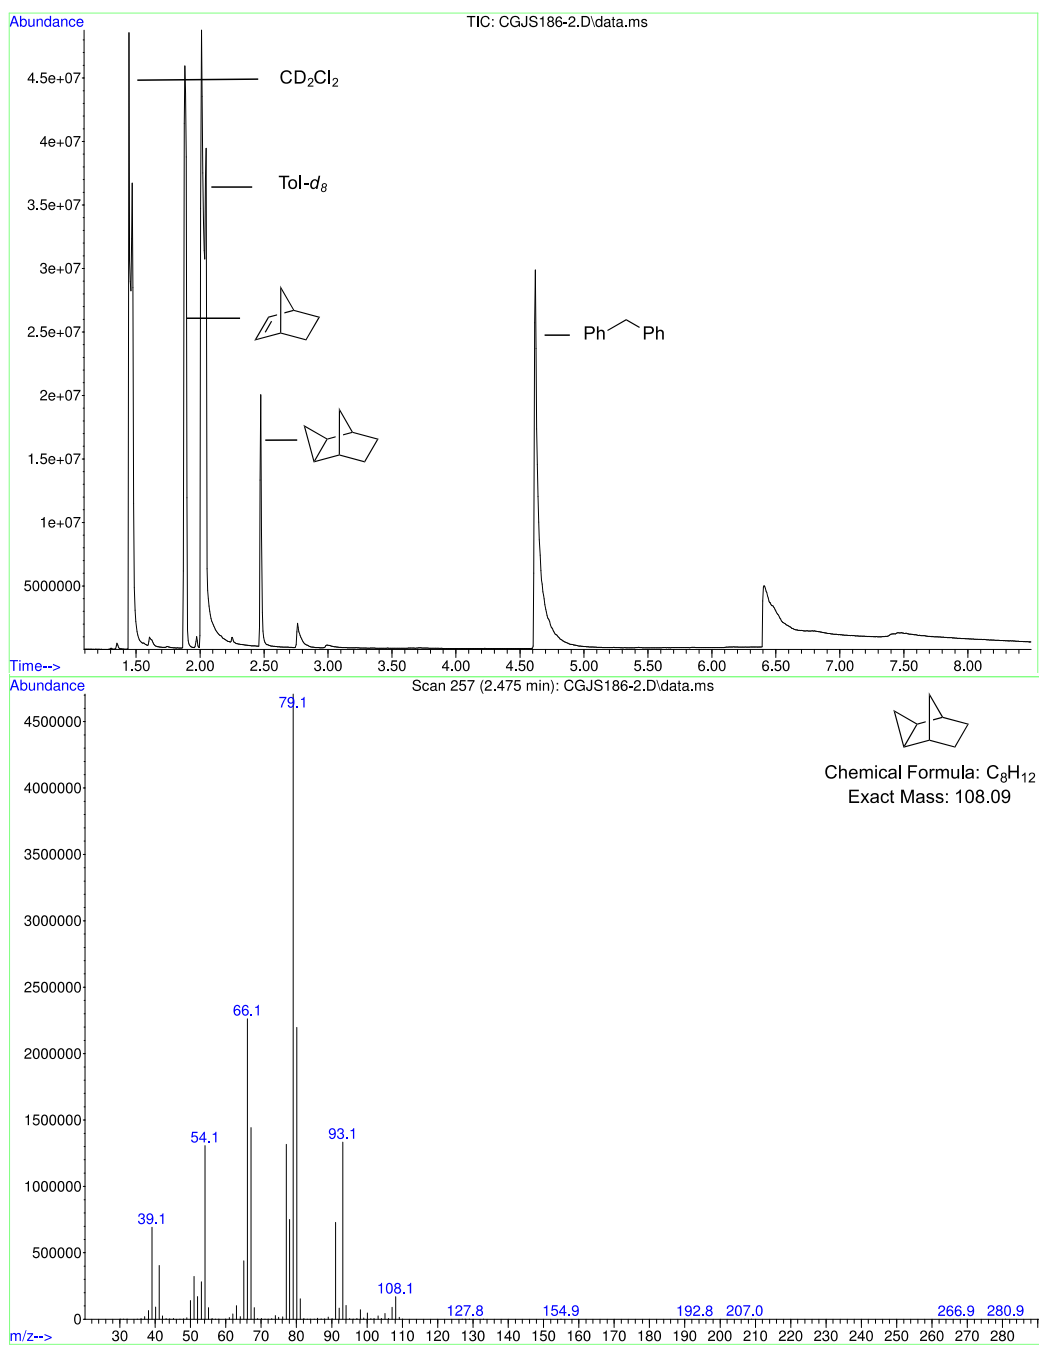

**Figure S9.** GC-MS trace and MS spectrum obtained during the cyclopropanation of norbornene with complex **1a** and AgNTf<sub>2</sub>.

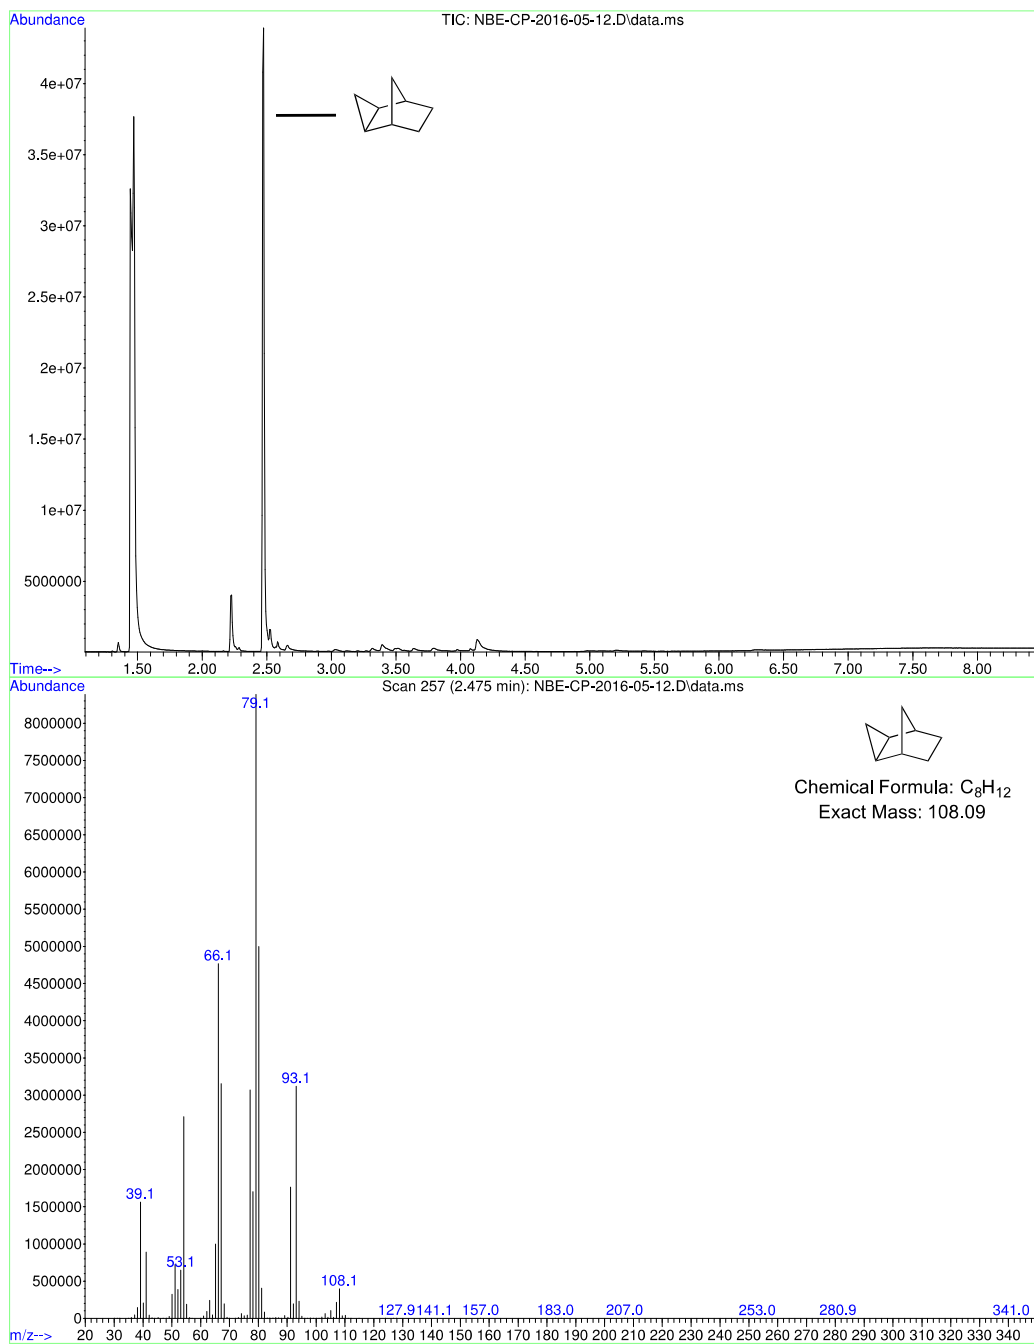

**Figure S10.** GC-MS trace and MS spectrum of an authentic sample of exo-tricyclo[3.2.1.0<sup>2,4</sup>]octane.



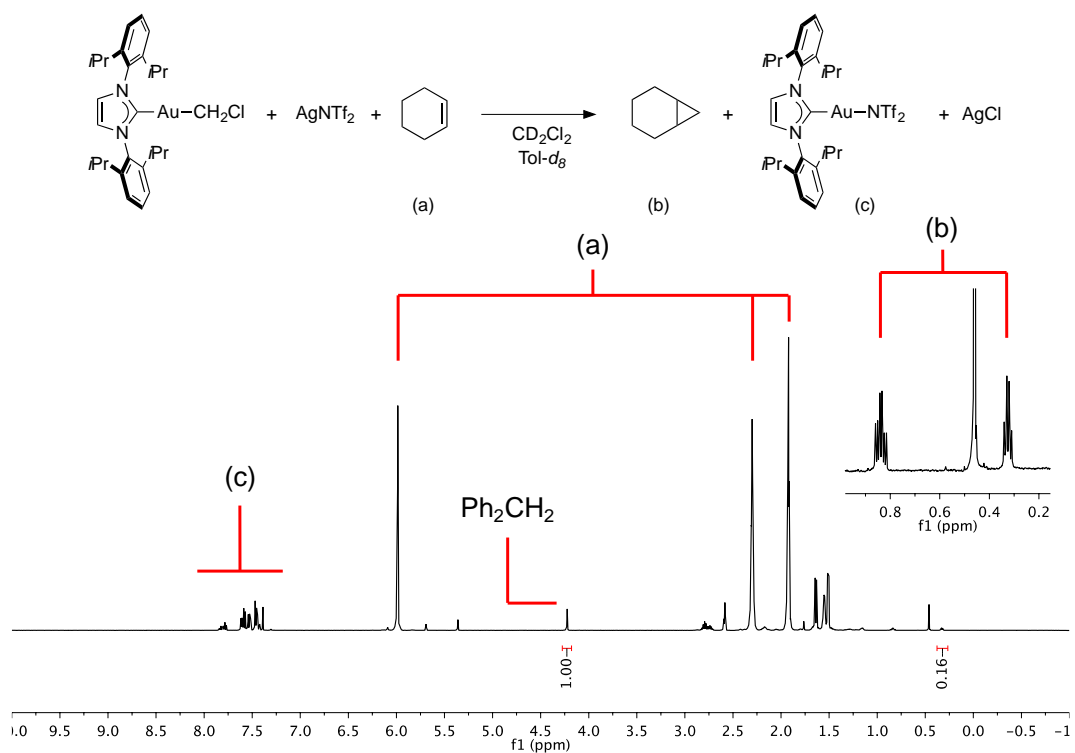

**Figure S11.** Typical <sup>1</sup>H NMR spectrum obtained during the cyclopropanation of cyclohexene with complex **1c** and AgNTf<sub>2</sub>. Diphenylmethane as internal standard.

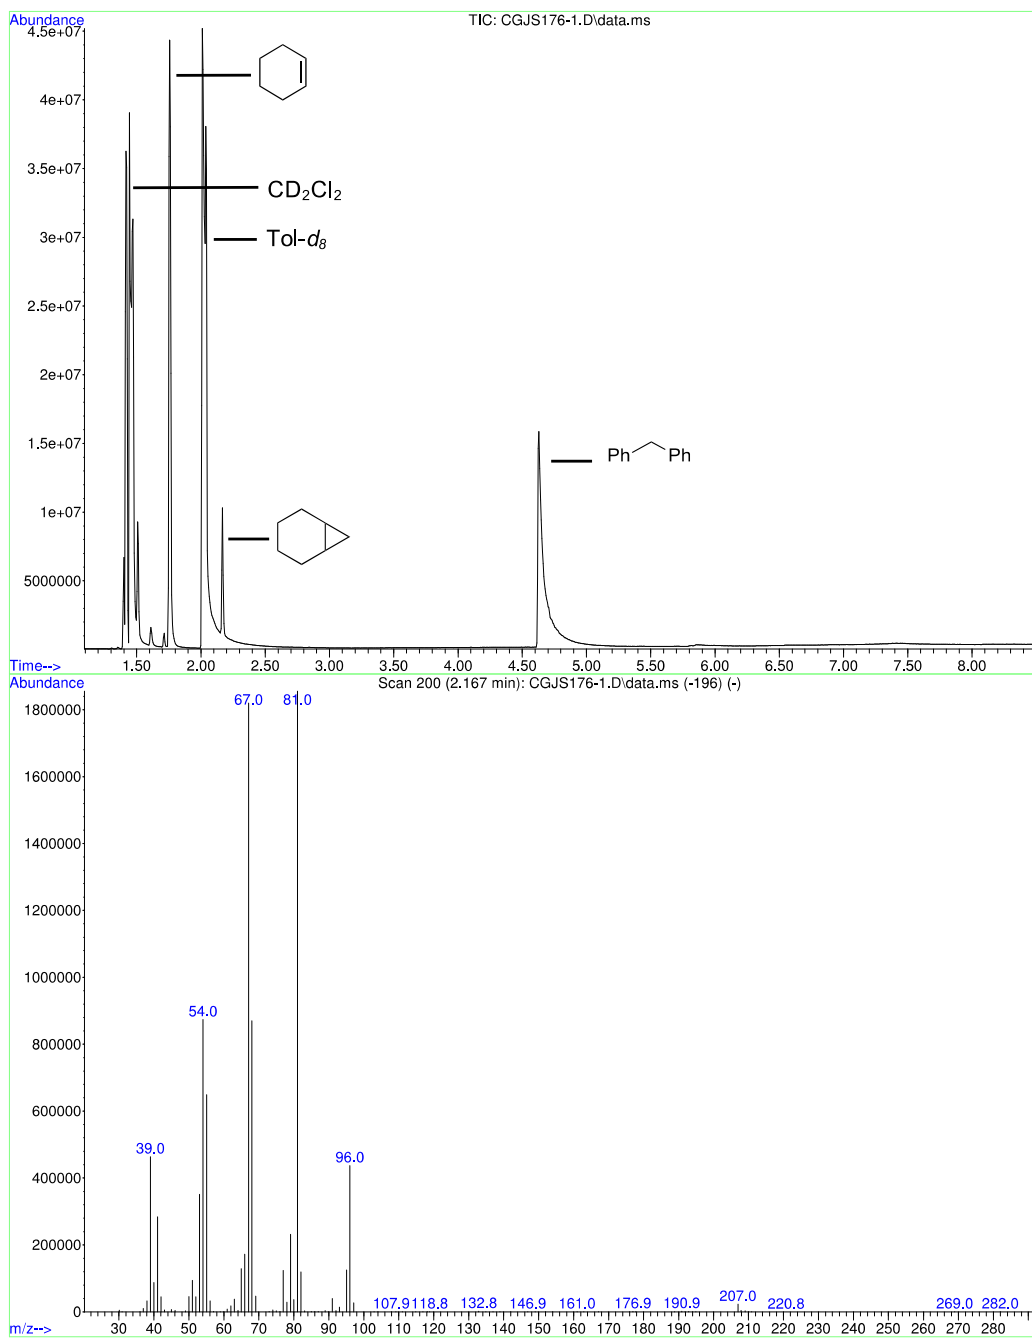

**Figure S12.** GC-MS trace and MS spectrum obtained during the cyclopropanation of cyclohexene with complex **1c** and AgNTf<sub>2</sub>.

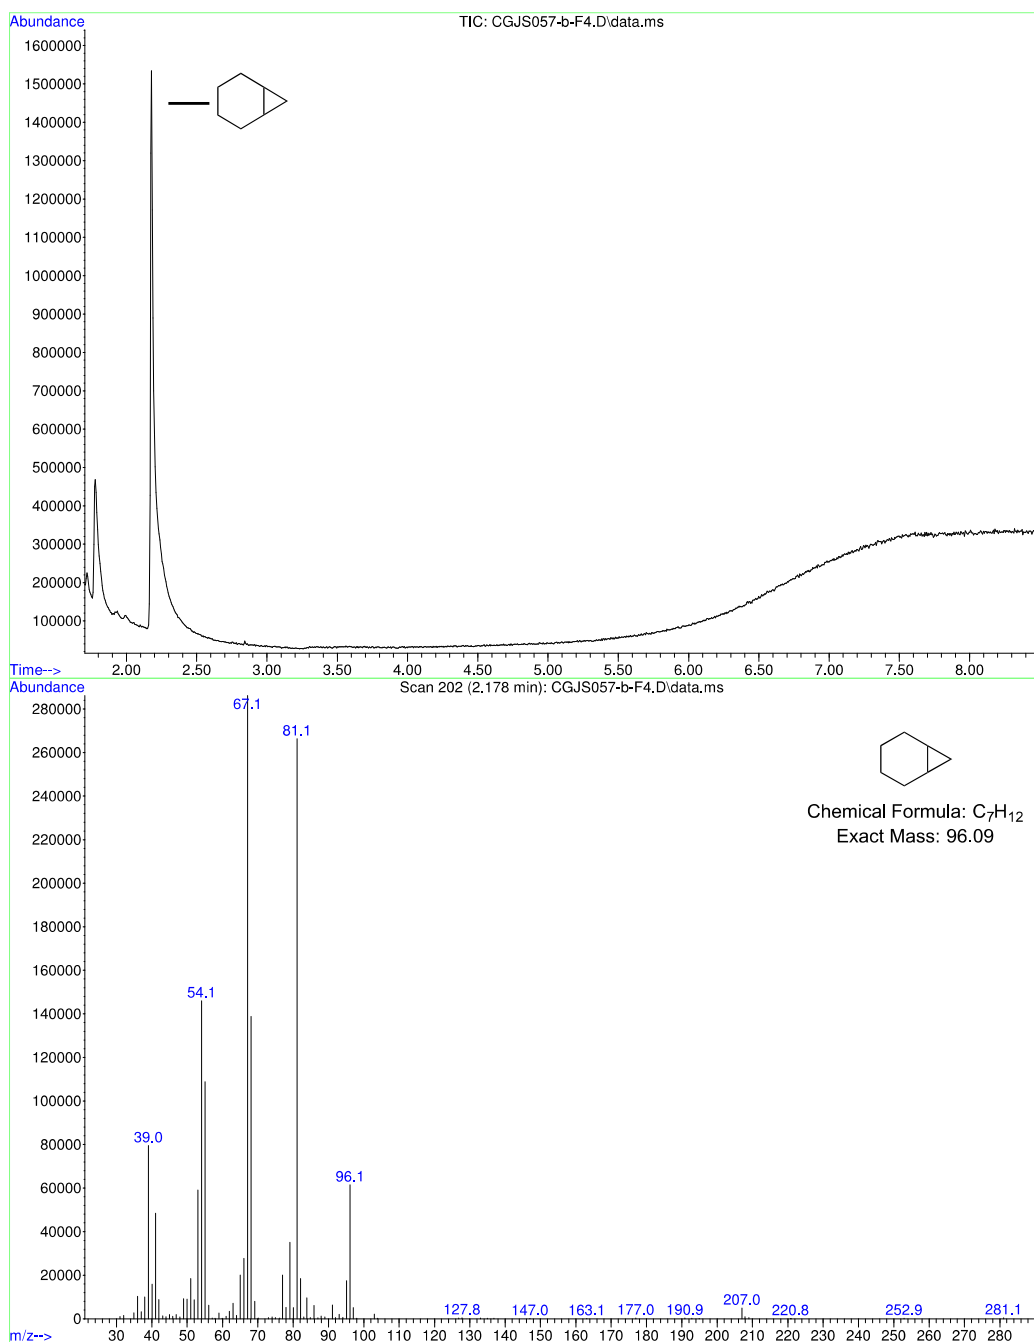

**Figure S13.** GC-MS trace and MS spectrum of an authentic sample of bicyclo[4.1.0]heptane.

**Table S2.** Yields for cyclopropanation of cyclohexene and norbornene with complexes **1a**, **1c** and **1d**. Procedure A.

| Entry   | Complex   | Olefin      | Integral I.S. | Integral Cyclop. | Yield (%) |
|---------|-----------|-------------|---------------|------------------|-----------|
| 1       | <b>1a</b> | Cyclohexene | 1145.05       | 280.25           | 51.82     |
| 2       | <b>1a</b> | Cyclohexene | 1107.57       | 355.89           | 68.04     |
| Average |           |             |               |                  | 59.93     |
| 3       | <b>1a</b> | Norbornene  | 791.24        | 294.48           | 78.81     |
| 4       | <b>1a</b> | Norbornene  | 2181.91       | 712.04           | 69.11     |
| Average |           |             |               |                  | 73.96     |
| 5       | <b>1c</b> | Cyclohexene | 1164.31       | 231.19           | 39.71     |

|         |           |             |                   |        |       |
|---------|-----------|-------------|-------------------|--------|-------|
| 6       | <b>1c</b> | Cyclohexene | 950.15            | 225.84 | 50.33 |
| Average |           |             |                   |        | 45.02 |
| 7       | <b>1c</b> | Norbornene  | 935.02            | 183.28 | 41.51 |
| 8       | <b>1c</b> | Norbornene  | 2045.81           | 583.02 | 60.34 |
| Average |           |             |                   |        | 50.92 |
| 9       | <b>1d</b> | Cyclohexene | 989.72            | 38.91  | 8.28  |
| 10      | <b>1d</b> | Cyclohexene | 1000 <sup>†</sup> | 0      | 0     |
| Average |           |             |                   |        | 4.14  |
| 11      | <b>1d</b> | Norbornene  | 1000 <sup>†</sup> | 0      | 0     |
| 12      | <b>1d</b> | Norbornene  | 1000 <sup>†</sup> | 0      | 0     |
| Average |           |             |                   |        | 0     |

<sup>†</sup>Arbitrary integral assigned when no product could be detected.

**Table S3.** Yields for cyclopropanation of cyclohexene and norbornene with complexes **1a**, **1c** and **1d**. Procedure B.

| Entry   | Complex   | Olefin      | Integral I.S.     | Integral Cyclop. | Yield (%) |
|---------|-----------|-------------|-------------------|------------------|-----------|
| 1       | <b>1a</b> | Cyclohexene | 1551.35           | 367.39           | 50.15     |
| 2       | <b>1a</b> | Cyclohexene | 1101.78           | 270.75           | 52.04     |
| Average |           |             |                   |                  | 51.10     |
| 3       | <b>1a</b> | Norbornene  | 1174.46           | 550.38           | 99.23     |
| 4       | <b>1a</b> | Norbornene  | 1012.27           | 454.01           | 94.97     |
| Average |           |             |                   |                  | 97.10     |
| 5       | <b>1c</b> | Cyclohexene | 1310.17           | 462.89           | 74.81     |
| 6       | <b>1c</b> | Cyclohexene | 1787.82           | 496.93           | 58.86     |
| Average |           |             |                   |                  | 66.84     |
| 7       | <b>1c</b> | Norbornene  | 1409.69           | 428.74           | 64.40     |
| 8       | <b>1c</b> | Norbornene  | 1399.73           | 570.28           | 86.27     |
| Average |           |             |                   |                  | 75.34     |
| 9       | <b>1d</b> | Cyclohexene | 1000 <sup>†</sup> | 0                | 0         |
| 10      | <b>1d</b> | Cyclohexene | 1000 <sup>†</sup> | 0                | 0         |
| Average |           |             |                   |                  | 0         |
| 11      | <b>1d</b> | Norbornene  | 1000 <sup>†</sup> | 0                | 0         |
| 12      | <b>1d</b> | Norbornene  | 1000 <sup>†</sup> | 0                | 0         |
| Average |           |             |                   |                  | 0         |

<sup>†</sup>Arbitrary integral assigned when no product could be detected.

### 3.5. In benzene, formation of cycloheptatriene

#### General Procedure A:

In a glovebox, 0.017 mmol of carbenoid complex (either 9.3 mg **1a**, 10.5 mg **1c** or 15.2 mg **1d**) was put into a glass vial together with the internal standard 0.018 mmol, 3.0  $\mu$ L diphenylmethane. The mixture was dissolved in 0.5 mL benzene-*d*<sub>6</sub> and transferred to a NMR tube capped with a rubber septum. Separately 0.020 mmol, 7.9 mg of AgNTf<sub>2</sub> was dissolved in 0.2 mL of benzene-*d*<sub>6</sub> and kept in a 1 mL plastic syringe protected from air. Outside the glovebox the silver solution was added over the mixture in the NMR tube at room temperature. The conversion was calculated by integration of the <sup>1</sup>H NMR signals of the cycloheptatriene and the internal standard.

## General Procedure B:

In a glovebox, 0.017 mmol of carbenoid complex (either 9.3 mg **1a**, 10.5 mg **1c** or 15.2 mg **1d**) was put into a glass vial together with the internal standard 0.018 mmol, 3.0  $\mu\text{L}$  diphenylmethane. The mixture was dissolved in 0.5 mL benzene- $d_6$  and transferred to a NMR tube capped with a rubber septum. Separately, 0.035 mmol, 8  $\mu\text{L}$  of TMSNTf<sub>2</sub> was taken in a microsyringe and protected from air. Outside the glovebox at room temperature TMSNTf<sub>2</sub> was added over the mixture in the NMR tube. The conversion was calculated by integration of the <sup>1</sup>H NMR signals of the cycloheptatriene and the internal standard using equation SE1.

Chemical shift of the formed cyclopropanes were in agreement to previously reported data.<sup>[4]</sup> In order to confirm the identity of the product, the reaction was repeated in non-deuterated benzene and its proton spectrum acquired using an external C<sub>6</sub>D<sub>6</sub> reference.

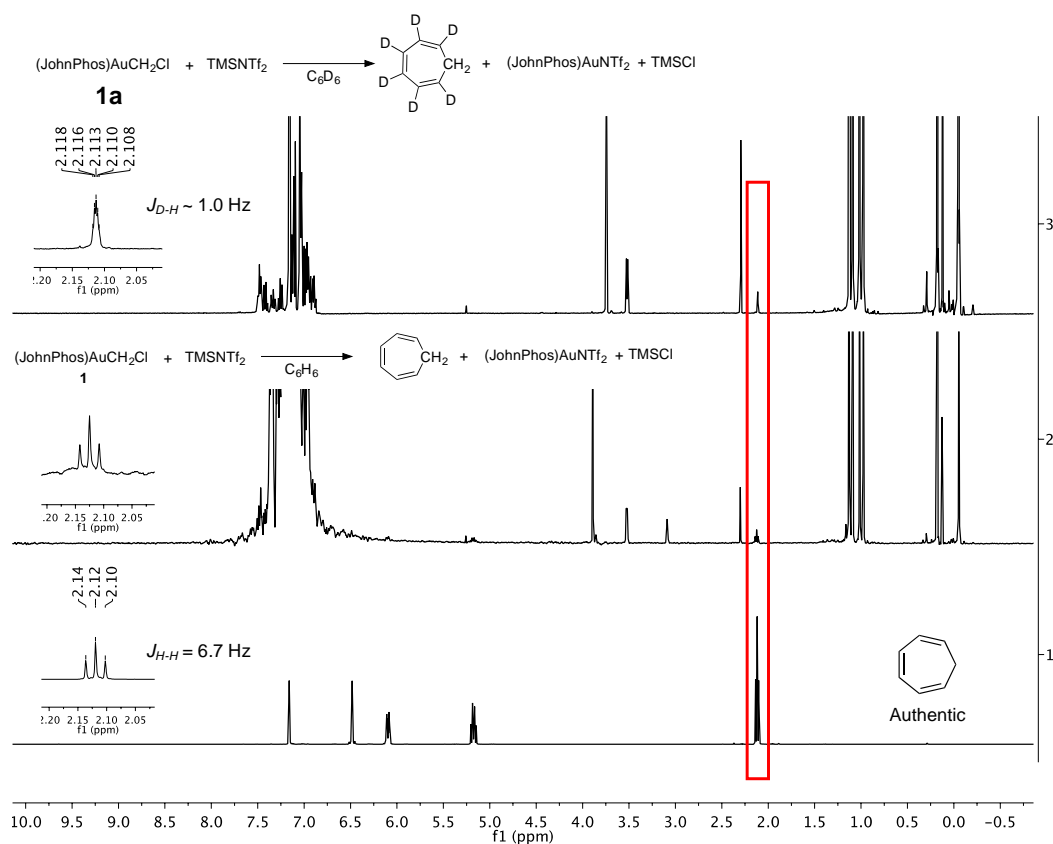

**Figure S14.** Comparison of <sup>1</sup>H NMR spectra of the reaction mixtures during ring expansion of C<sub>6</sub>D<sub>6</sub> (top), C<sub>6</sub>H<sub>6</sub> (middle) under conditions B and authentic cycloheptatriene (bottom).

**Table S4.** Yields for the ring expansion of C<sub>6</sub>D<sub>6</sub> complexes **1**, **3** and **4**.

| Entry   | Complex   | Procedure | Integral I.S. | Integral CHT | Yield (%) |
|---------|-----------|-----------|---------------|--------------|-----------|
| 1       | <b>1a</b> | A         | 3062.93       | 229.33       | 7.93      |
| 2       | <b>1a</b> | A         | 2036.54       | 106.18       | 5.52      |
| Average |           |           |               |              | 6.72      |
| 3       | <b>1a</b> | B         | 3231.52       | 360.02       | 11.79     |
| 4       | <b>1a</b> | B         | 3411.11       | 404.24       | 12.54     |
| Average |           |           |               |              | 12.16     |
| 5       | <b>1c</b> | A         | 2456.09       | 322.26       | 13.89     |

|         |           |   |                   |        |       |
|---------|-----------|---|-------------------|--------|-------|
| 6       | <b>1c</b> | A | 7337.91           | 675.81 | 9.75  |
| Average |           |   |                   |        | 11.82 |
| 7       | <b>1c</b> | B | 3050.78           | 795.20 | 27.60 |
| 8       | <b>1c</b> | B | 3006.99           | 780.7  | 27.49 |
| Average |           |   |                   |        | 27.56 |
| 9       | <b>1d</b> | A | 2331.99           | 32.99  | 1.41  |
| 10      | <b>1d</b> | A | 1000 <sup>†</sup> | 0      | 0     |
| Average |           |   |                   |        | 0.70  |
| 11      | <b>1d</b> | B | 2432.51           | 102.76 | 4.47  |
| 12      | <b>1d</b> | B | 1000 <sup>†</sup> | 0      | 0     |
| Average |           |   |                   |        | 2.23  |

<sup>†</sup>Arbitrary integral assigned when no product could be detected.

### 3.6. Kinetic measurements

Reaction of gold carbenoid **1a** with AgOTf in toluene-*d*<sub>8</sub> was monitored by <sup>1</sup>H NMR at various temperatures. The rate determined constants allowed the calculation of the activation parameters  $\Delta H^\ddagger$  and  $\Delta S^\ddagger$  for the initial exchange of chloride for triflate (**1a** to **7a**) and the subsequent decay of **7a** into **9a** and ethylene. In a typical experiment, inside the glovebox, 0.70 mL of a stock solution containing carbenoid complex **1a** (0.0262 mmol/mL) and diphenylmethane as internal standard (0.0262 mmol/mL) was put in a NMR tube and capped with a rubber septum. A syringe was loaded with 0.30 mL of a stock solution of AgOTf (0.613 mmol/mL) and protected from air. Outside the glovebox, either at room temperature (for runs at or above room temperature) or at 253 K (for all other cases), the solution of AgOTf was added over the mixture in the NMR tube and immediately transferred to the NMR instrument. <sup>1</sup>H NMR spectra were acquired every 3 minutes after the temperature of the sample had stabilized.

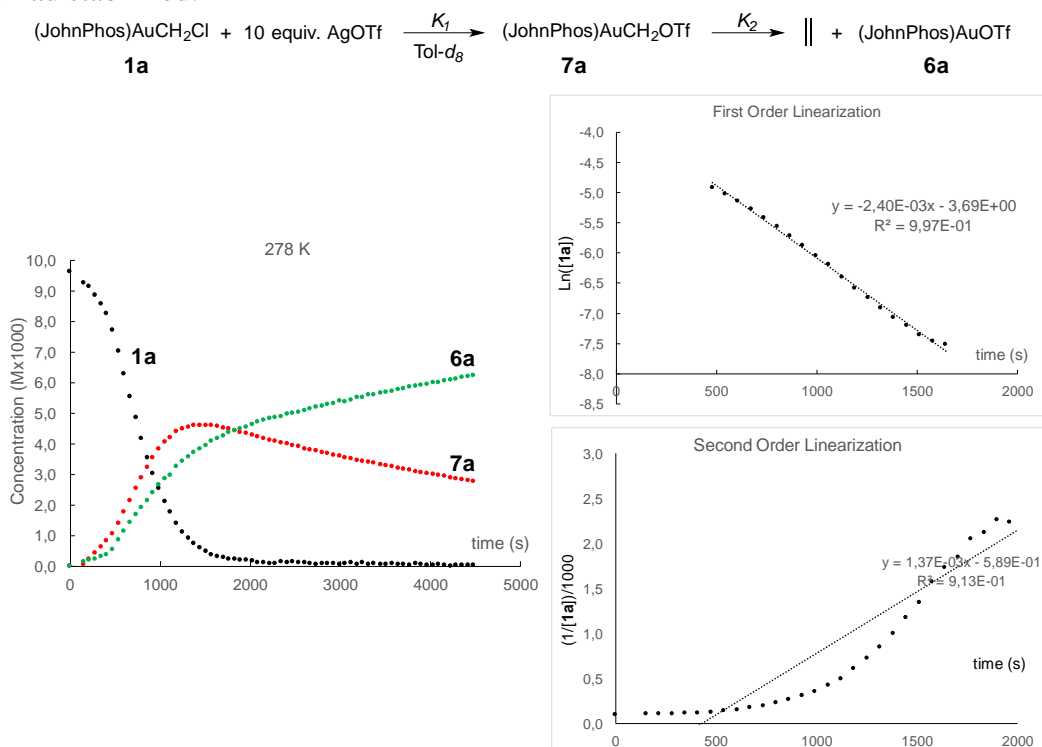

**Figure S15.** Left: typical concentration profiles measured for the reaction of **1a** with AgOTf at temperatures lower than room temperature. Right: corresponding first and second order linearization plots for the change of concentration of **1a** over time.

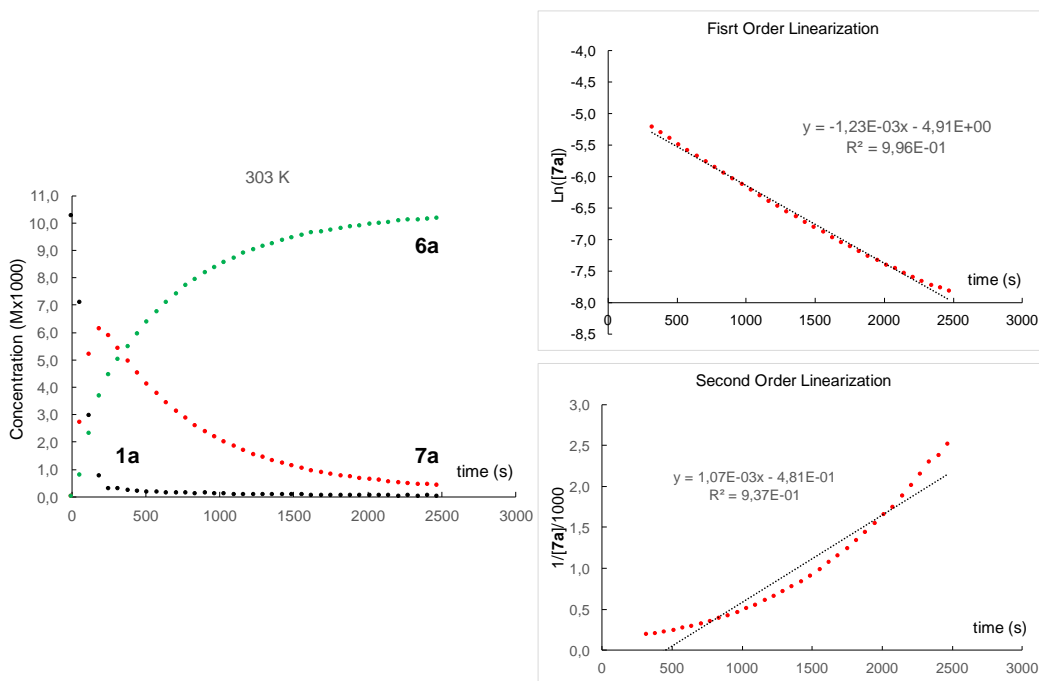

**Figure S16.** Left: typical concentration profiles measured for the reaction of **1a** with AgOTf at temperatures higher than room temperature. Right: corresponding first and second order linearization plots for the change of concentration of **7a** over time.

**Table S5.** Measured rate constants (average of two measurements).

| T (K) | $k_{obs}(s^{-1})$ | $k_1 (M^{-1}s^{-1})^*$ | T (K) | $k_2 (s^{-1})$ |
|-------|-------------------|------------------------|-------|----------------|
| 263   | 5.44E-04          | 5.85E-03               | 288   | 3.13E-04       |
| 268   | 9.71E-04          | 1.04E-02               | 293   | 4.77E-04       |
| 273   | 1.29E-03          | 1.38E-02               | 296   | 7.47E-04       |
| 278   | 2.33E-03          | 2.50E-02               | 303   | 1.19E-03       |

\*Under pseudofirst order conditions  $k_1 = k_{obs}/[AgOTf]_0$  where  $[AgOTf]_0 = 0.09302$  M

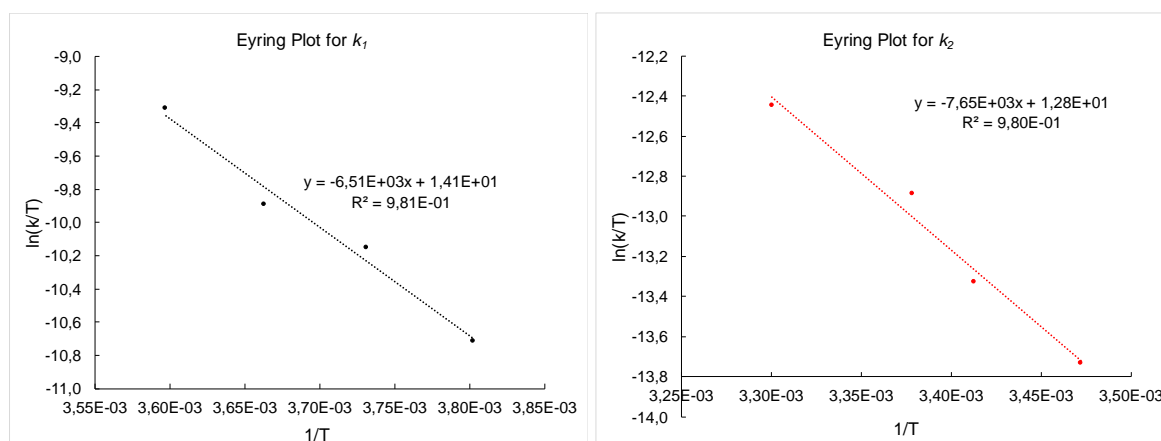

**Figure S17.** Eyring plots constructed with data from table S4.

Using the linearized Eyring equation<sup>[5]</sup>  $\ln\left(\frac{k}{T}\right) = \frac{-\Delta H^\ddagger}{R} \cdot \frac{1}{T} + \ln\left(\frac{k_B}{h}\right) + \ln\left(\frac{\Delta S^\ddagger}{R}\right)$  the activation parameters for the first ( $k_1$ :  $\Delta H^\ddagger = 12.9 \pm 0.5$  kcal $\cdot$ mol $^{-1}$  and  $\Delta S^\ddagger = -19.2 \pm 2$  cal $\cdot$ mol $^{-1}$ K $^{-1}$ ) and

second ( $k_2$ :  $\Delta H^\ddagger = 15.0 \pm 0.7 \text{ kcal}\cdot\text{mol}^{-1}$  and  $\Delta S^\ddagger = -21.5 \pm 2 \text{ cal}\cdot\text{mol}^{-1}\text{K}^{-1}$ ) processes were calculated.

### 3.7. Activation of complex **9**

In a glovebox, complex **9** (0.016 mmol, 10.0 mg) was put into a glass vial together with the internal standard (diphenylmethane, 0.02 mmol, 3.4  $\mu\text{L}$ ), dissolved in 0.5 mL  $\text{CD}_2\text{Cl}_2$  and transferred to a NMR tube capped with a rubber septum. Separately, TMSOTf (0.022 mmol, 4  $\mu\text{L}$ ) was taken in a microsyringe and protected from air. Outside the glovebox at room temperature TMSOTf was added over the mixture in the NMR tube. After NMR monitoring was finished, the mixture was filtered through a small pad of silica gel and rinsed with two portions of 0.5 mL  $\text{CH}_2\text{Cl}_2$ . The resulting solution was analyzed by GC-MS. The yield was calculated by integration of the GC-FID signals of the *cis*-stilbene, *trans*-stilbene, 1,2,3-triphenylcyclopropane and internal standard using equation SE4, the areas were correlated to the data obtained in an equimolar mixture of the products and the internal standard (0.02 mmol of every compound).

$$\text{Yield}(\%) = \frac{\left( \frac{A_{\text{prod}} * n_{\text{I.S.}} * A_{\text{I.S.}}^{\text{eq.mix.}}}{A_{\text{I.S.}} * A_{\text{prod}}^{\text{eq.mix.}}} \right)}{n_{\text{prod}}^{\text{max}}} * 100$$

**Equation SE4.** Where:  $A_{\text{prod}}$  = area corresponding to the integrated signal of the product,  $n_{\text{I.S.}}$  = amount of internal standard used (0.02 mmol),  $A_{\text{I.S.}}^{\text{eq.mix.}}$  = area corresponding to the integrated signal of the internal standard in the equimolar mixture used for the calibration,  $A_{\text{I.S.}}$  = area corresponding to the integrated signal of the internal standard,  $A_{\text{prod}}^{\text{eq.mix.}}$  = area corresponding to the integrated signal of the product in the equimolar mixture used for the calibration,  $n_{\text{prod}}^{\text{max}}$  = maximum amount of product, 0.008 mmol for *cis* and *trans*-stilbene, 0.005 mmol for 1,2,3-triphenylcyclopropane.

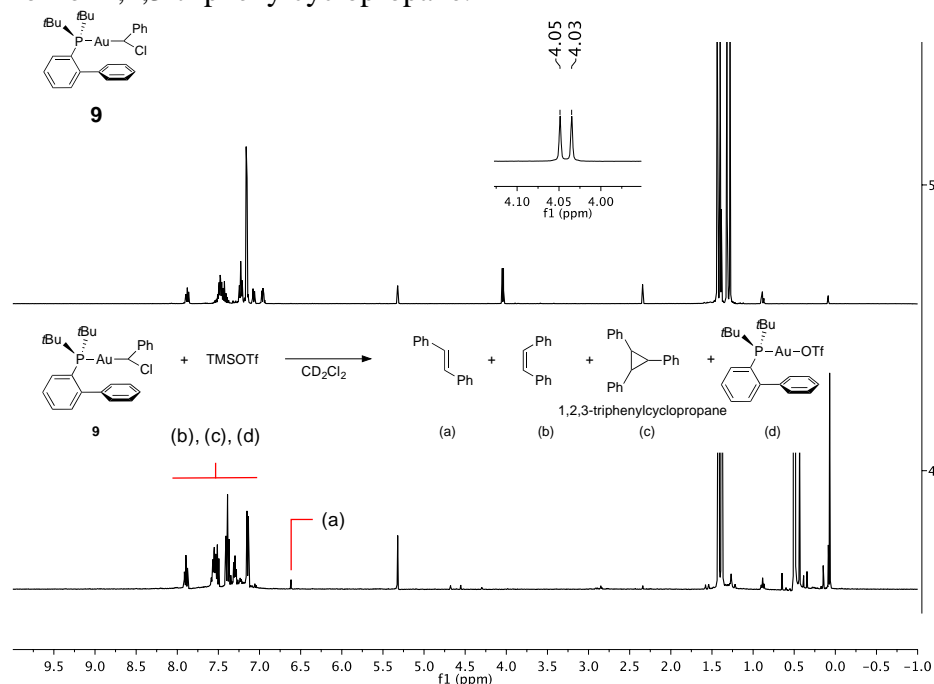

**Figure S18.** Comparison of  $^1\text{H}$  NMR spectra of **9** before (top) and after activation with TMSOTf (bottom). Signal corresponding to *cis*-stilbene is clearly visible at 6.62 ppm. Other products were more reliably detected by GC-MS and GC-FID.



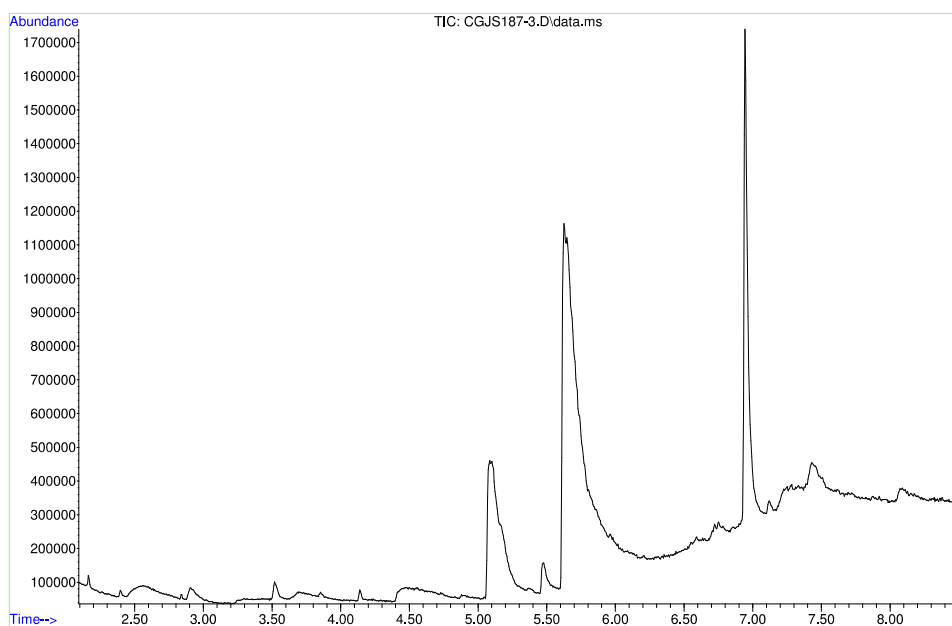

**Figure S19.** GC-MS chromatogram obtained after the activation of **9** with TMSOTf.

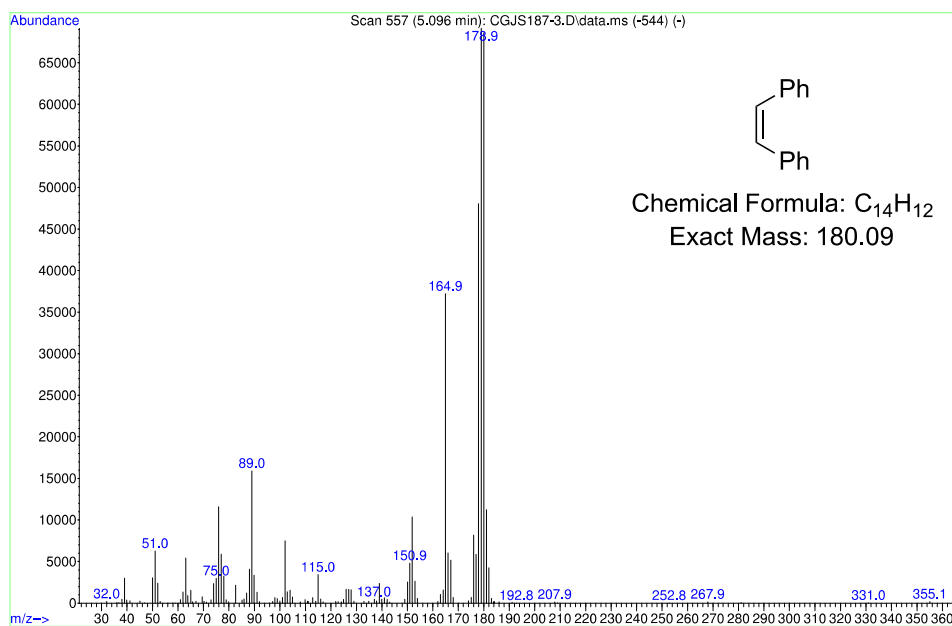

**Figure S20.** MS spectrum of peak at 5.096 min.

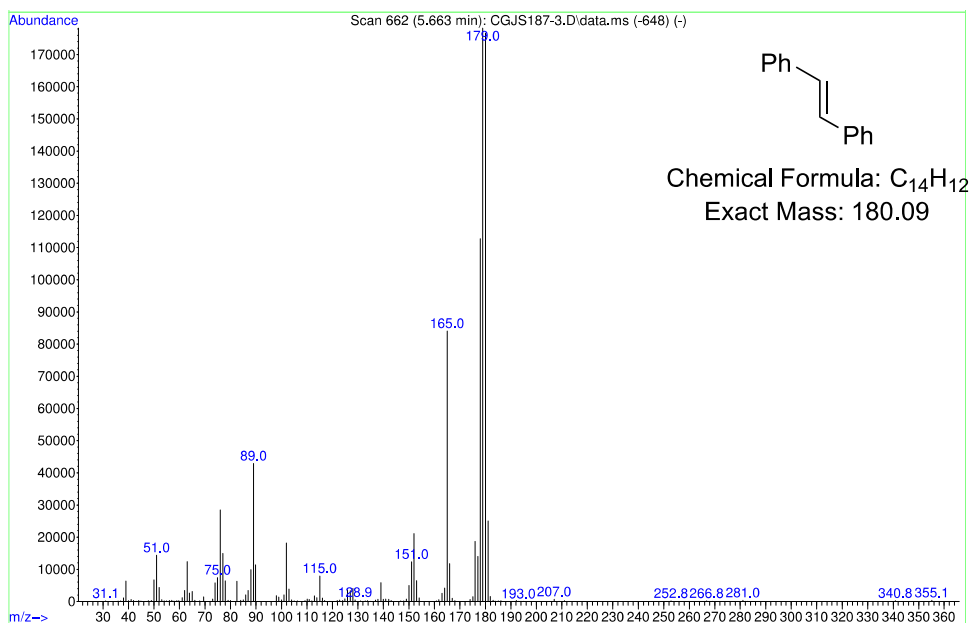

**Figure S21.** MS spectrum of peak at 5.663 min.

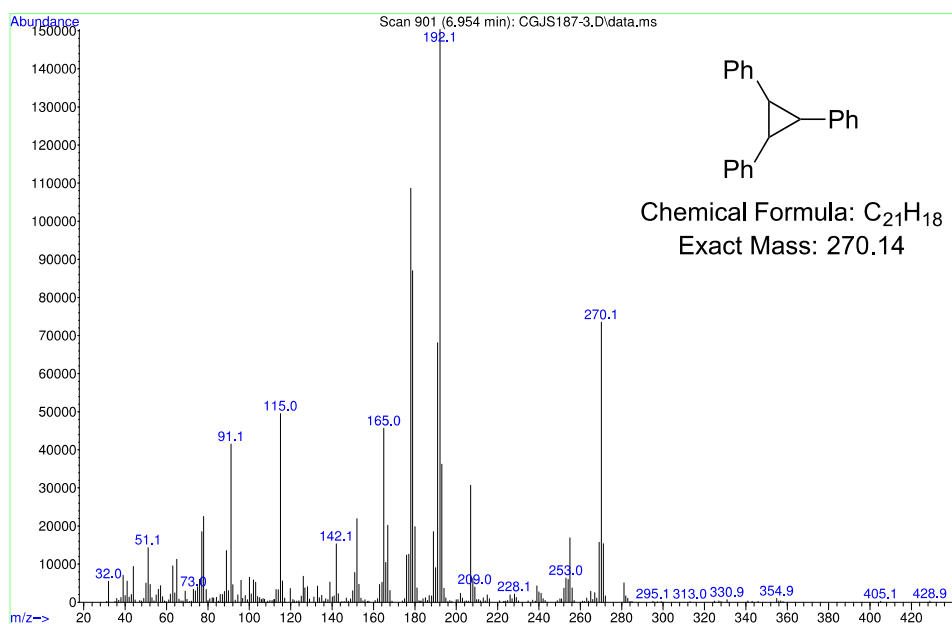

**Figure S22.** MS spectrum of peak at 6.954 min.

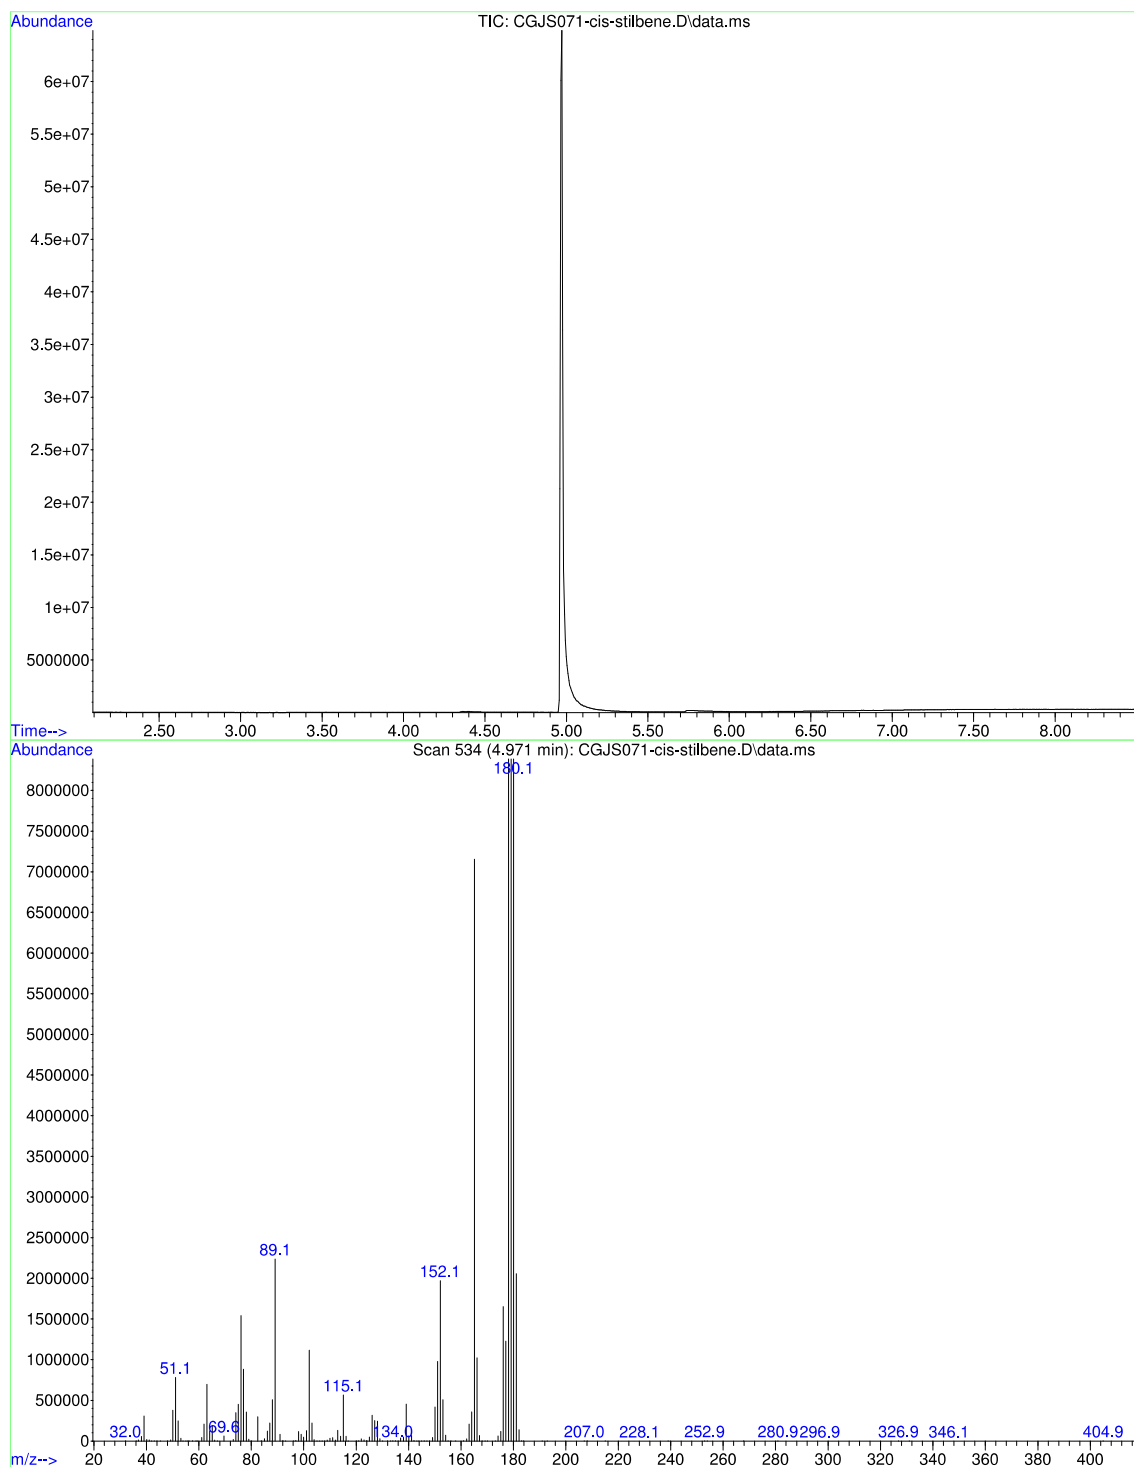

**Figure S23.** GC-MS trace and MS spectrum of authentic *cis*-stilbene.

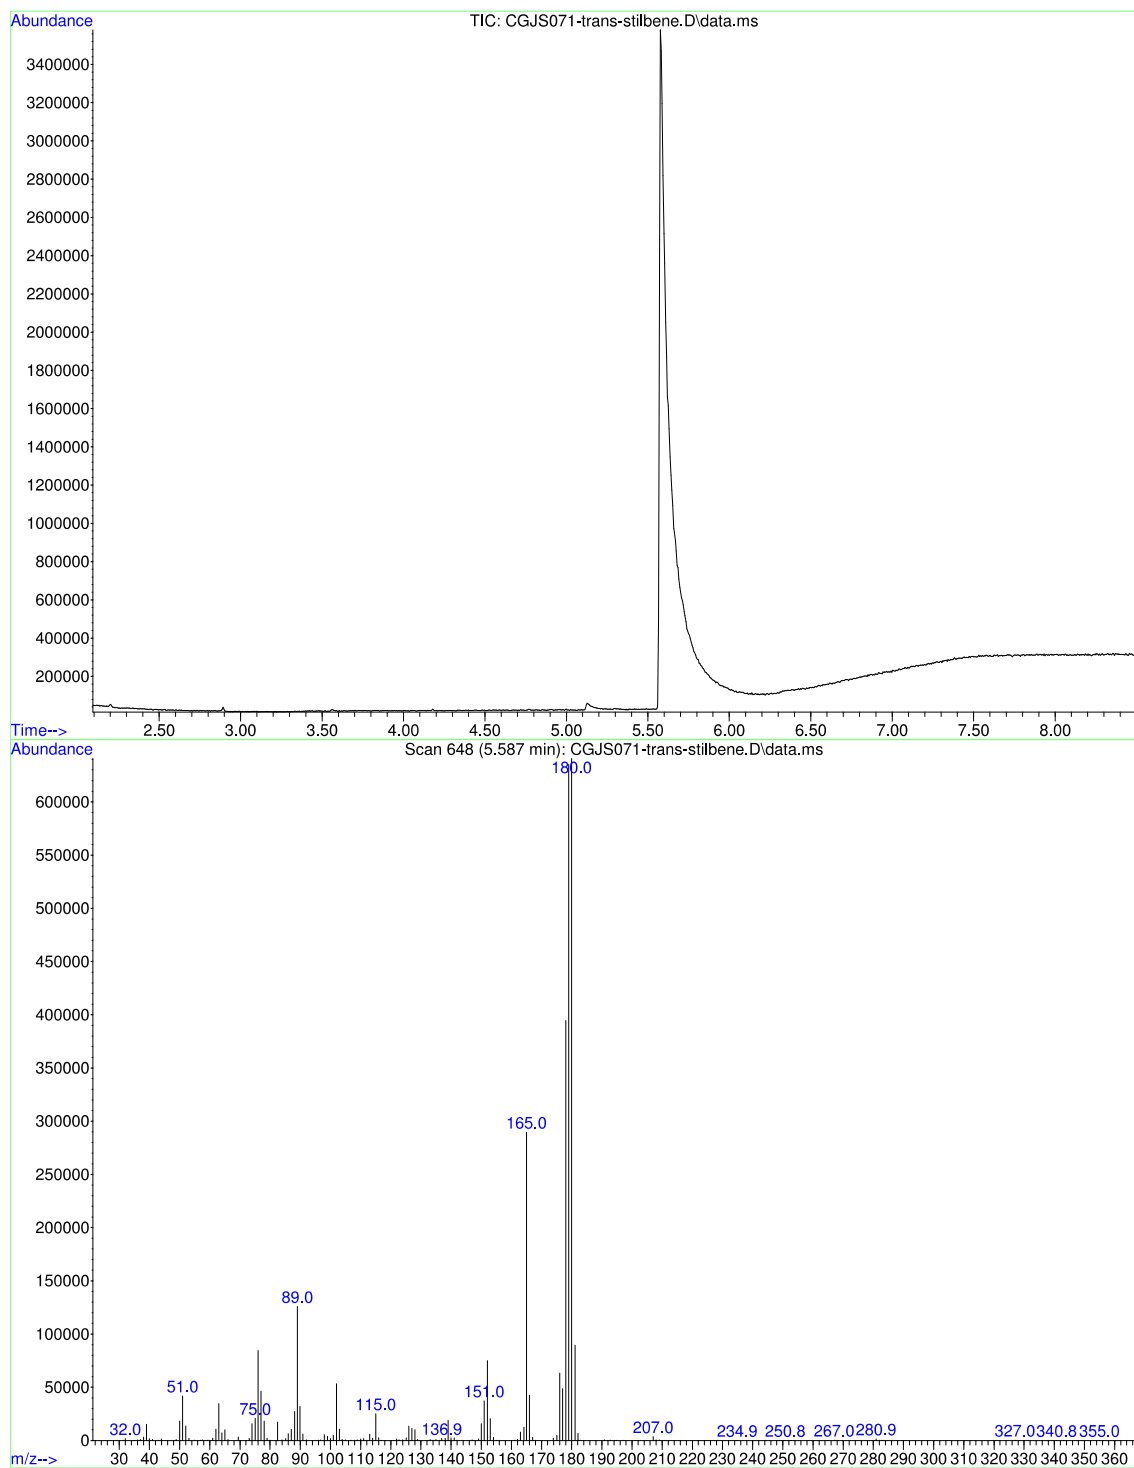

**Figure S24.** GC-MS trace and MS spectrum of authentic *trans*-stilbene.

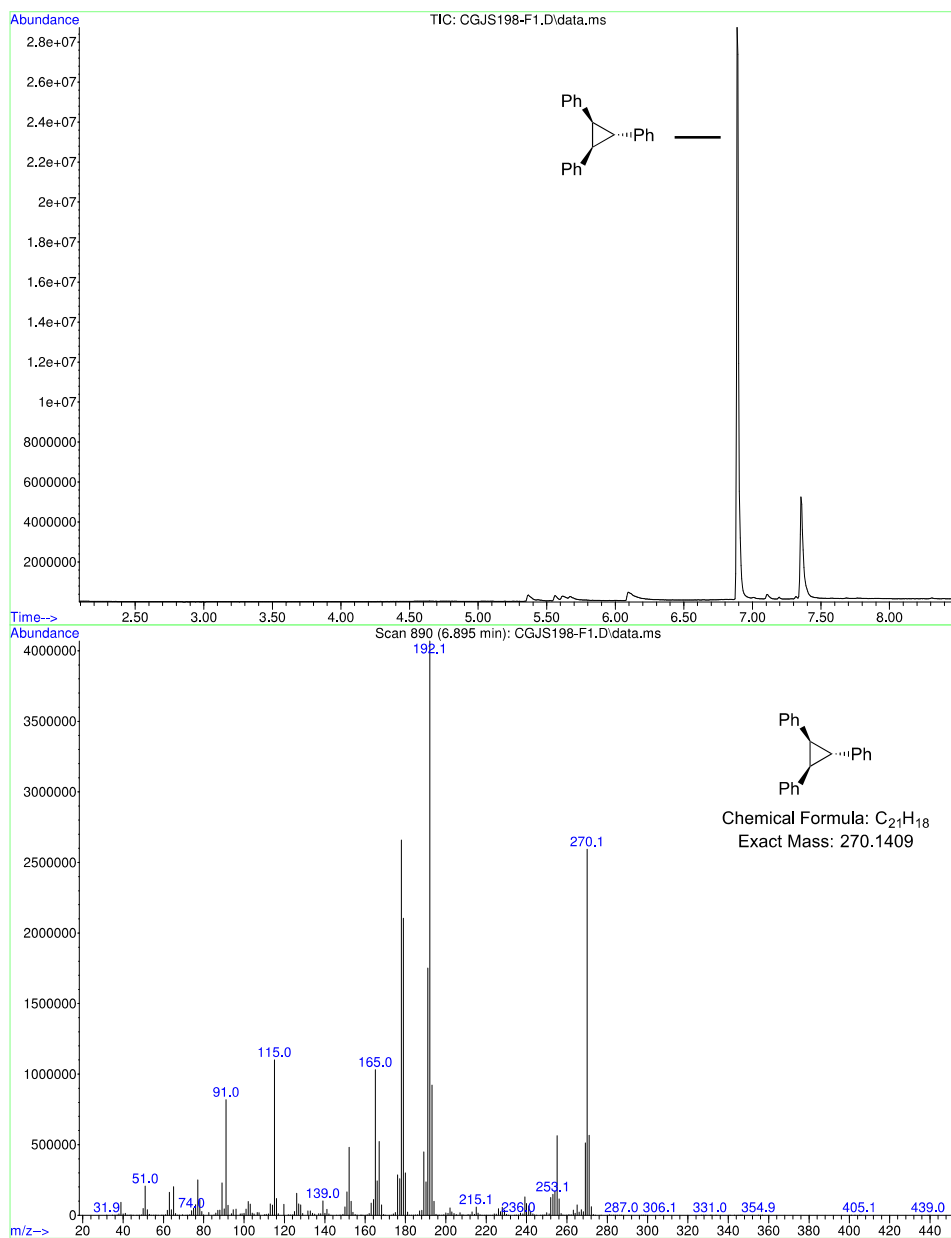

**Figure S25.** GC-MS trace and MS spectrum of authentic 1,2,3-triphenylcyclopropane.

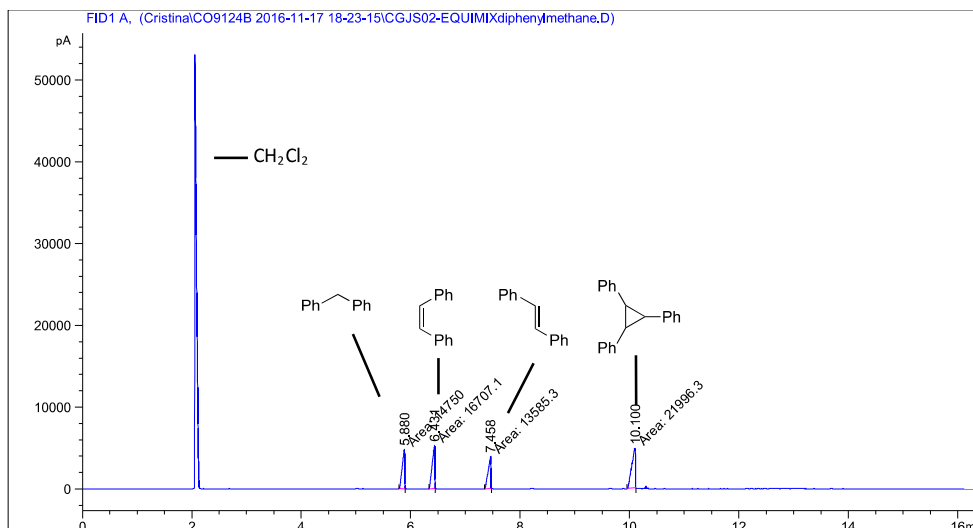

**Figure S26.** GC-FID chromatogram of the equimolar mixture of *cis*-stilbene, *trans*-stilbene, 1,2,3-triphenylcyclopropane and diphenylmethane.

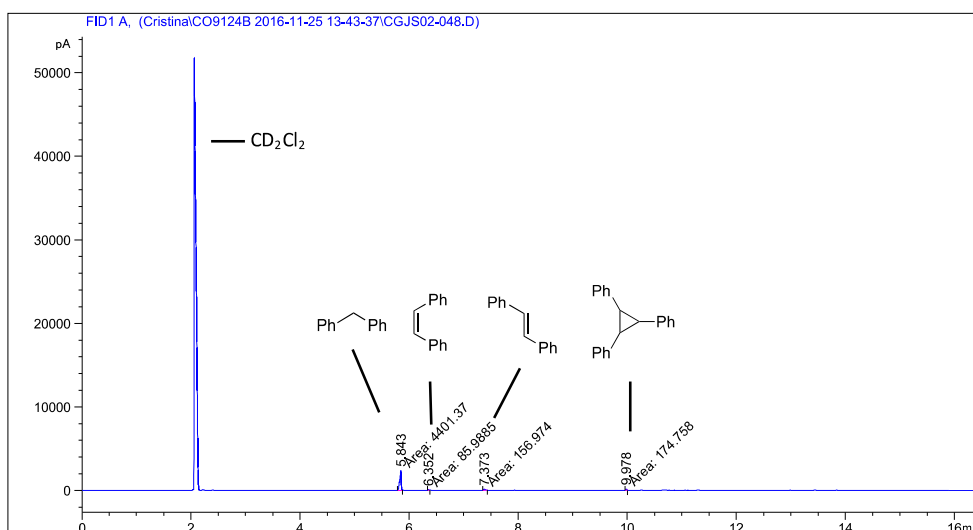

**Figure S27.** GC-FID chromatogram obtained after the activation of **9** with TMSOTf.

**Table S6.** Yields for *cis*-stilbene, *trans*-stilbene and 1,2,3-triphenylcyclopropane obtained after activation of **9** with TMSOTf.

| Entry   | Compound                           | Area I.S. | Area compound | Yield (%) |
|---------|------------------------------------|-----------|---------------|-----------|
| 1       | <b><i>cis</i>-stilbene</b>         | 5206.00   | 88.48         | 4.06      |
| 2       |                                    | 4401.37   | 85.99         | 4.31      |
| Average |                                    |           |               | 4.19      |
| 3       | <b><i>trans</i>-stilbene</b>       | 5206.00   | 197.12        | 11.11     |
| 4       |                                    | 4401.37   | 156.97        | 9.70      |
| Average |                                    |           |               | 10.4      |
| 5       | <b>1,2,3-triphenylcyclopropane</b> | 5206.00   | 138.48        | 7.13      |
| 6       |                                    | 4401.37   | 174.76        | 9.70      |
| Average |                                    |           |               | 8.41      |

## 4. X-Ray crystallography

### 4.1. Analysis of previously reported structures featuring a [MCH<sub>2</sub>Cl] motif as per May 2016.

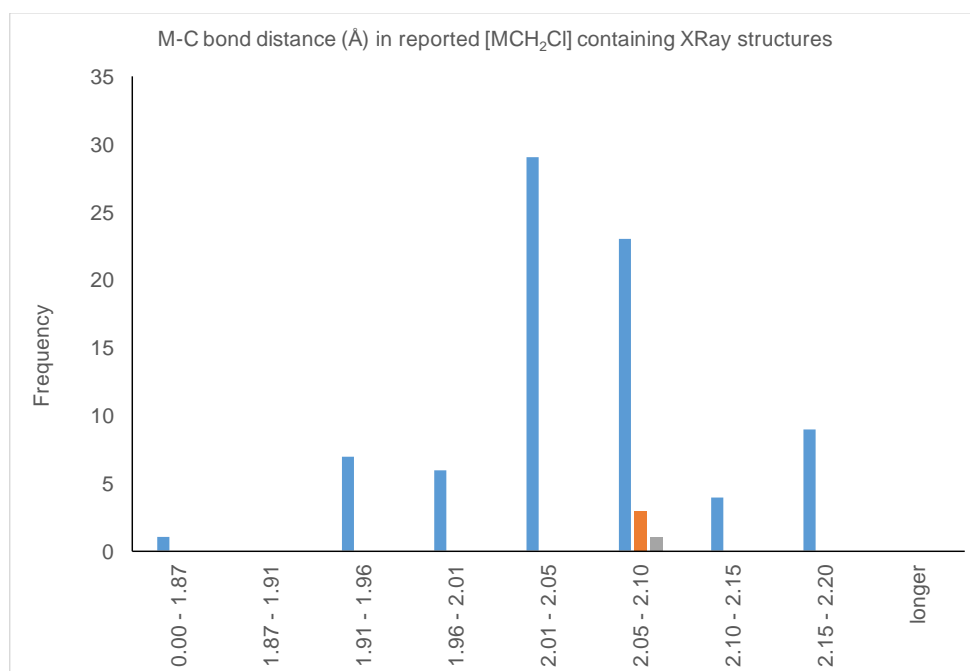

**Figure S28.** Histogram showing the distribution of M–C bond distances found in all currently published crystal structures featuring a [MCH<sub>2</sub>Cl] (blue), new chloromethyl complexes **1a**, **1b** and **1c** (orange) and chloro(phenyl)methyl complex **9** (grey).

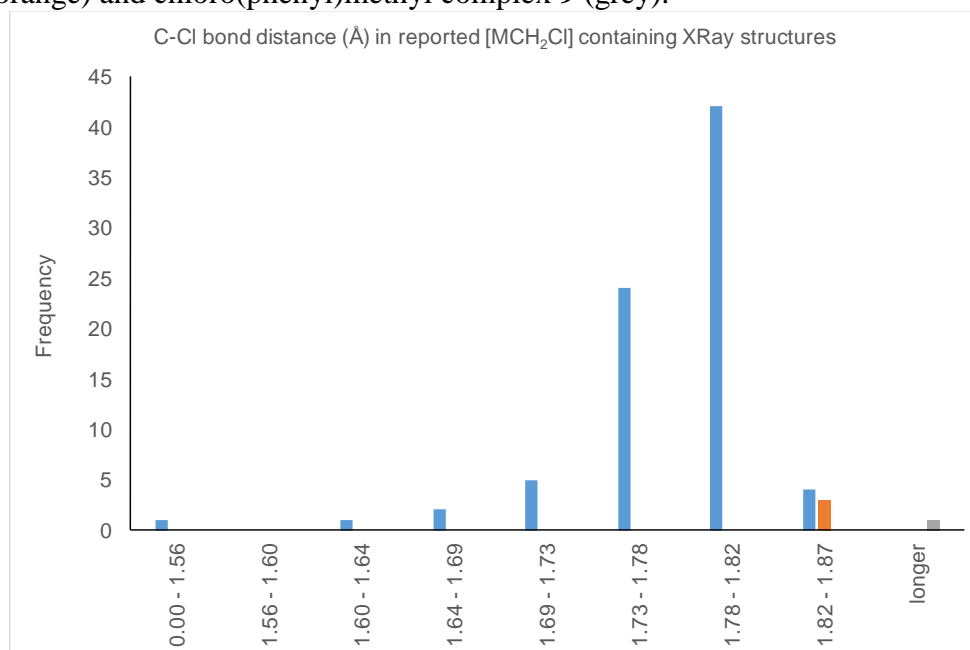

**Figure S29.** Histogram showing the distribution of C–Cl bond distances found in all currently published crystal structures featuring a [MCH<sub>2</sub>Cl] (blue), new chloromethyl complexes **1a**, **1b** and **1c** (orange) and chloro(phenyl)methyl complex **9** (grey).

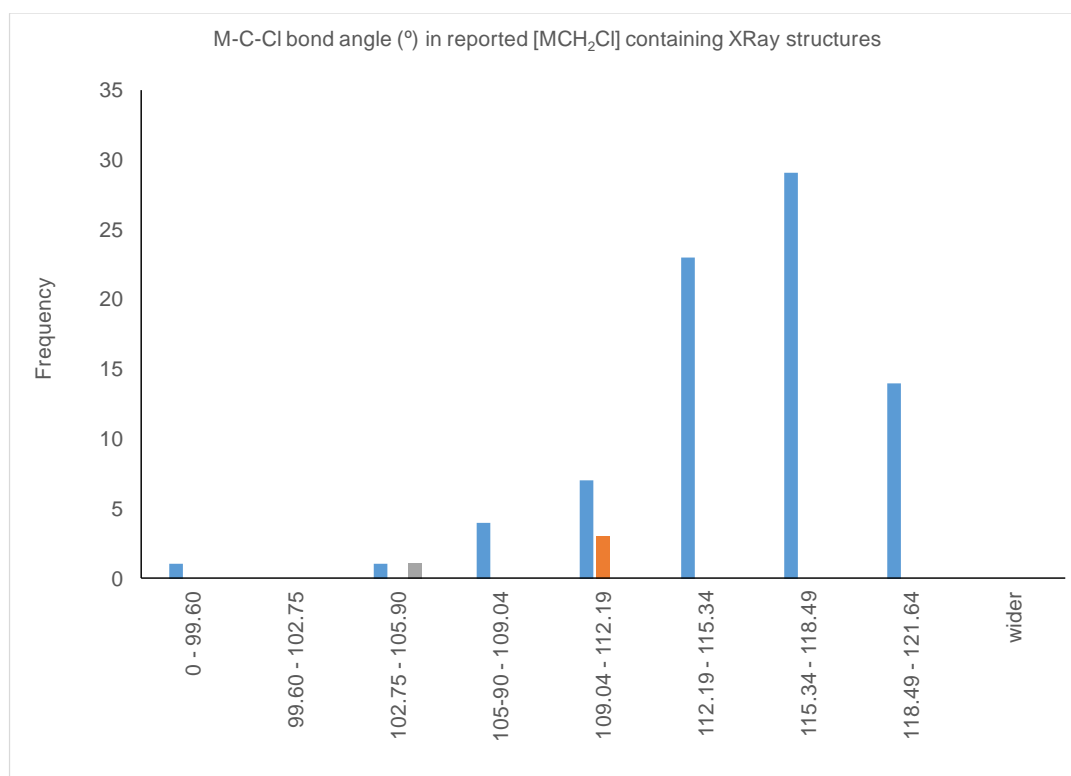

**Figure S30.** Histogram showing the distribution of M–C–Cl bond angles found in all currently published crystal structures featuring a [MCH<sub>2</sub>Cl] (blue), new chloromethyl complexes **1a**, **1b** and **1c** (orange) and chloro(phenyl)methyl complex **9** (grey).



## 4.2. Crystal data and structure refinement for complex **1a**

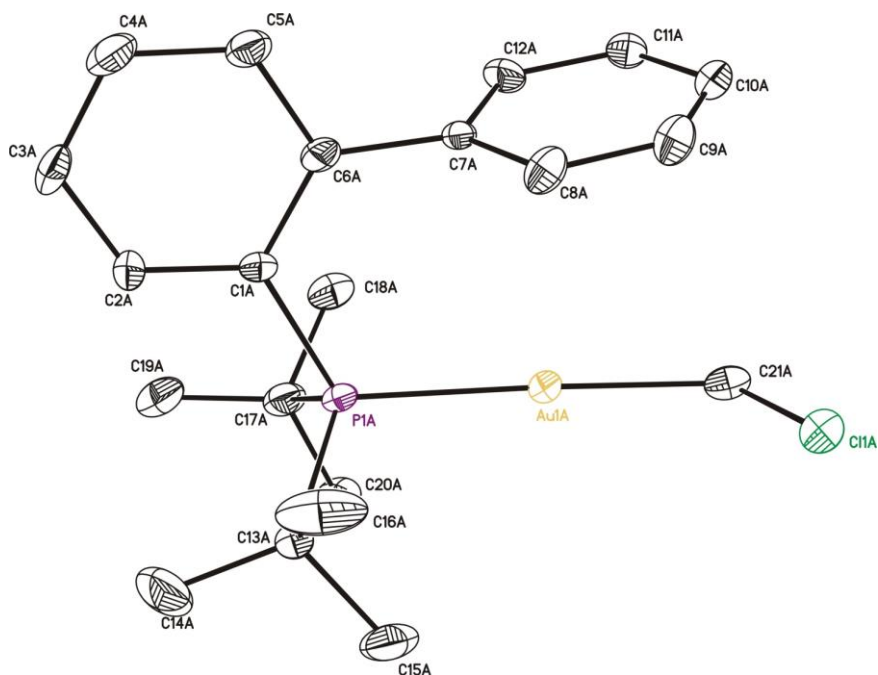

|                                   |                                                                                |                            |
|-----------------------------------|--------------------------------------------------------------------------------|----------------------------|
| Empirical formula                 | C <sub>42</sub> H <sub>58</sub> Au <sub>2</sub> Cl <sub>2</sub> P <sub>2</sub> |                            |
| Formula weight                    | 1089.66                                                                        |                            |
| Temperature                       | 100(2) K                                                                       |                            |
| Wavelength                        | 0.71073 Å                                                                      |                            |
| Crystal system                    | Triclinic                                                                      |                            |
| Space group                       | P-1                                                                            |                            |
| Unit cell dimensions              | a = 10.4982(6) Å                                                               | $\alpha = 72.868(3)^\circ$ |
|                                   | b = 13.6572(7) Å                                                               | $\beta = 89.459(3)^\circ$  |
|                                   | c = 15.1002(9) Å                                                               | $\gamma = 88.404(3)^\circ$ |
| Volume                            | 2068.1(2) Å <sup>3</sup>                                                       |                            |
| Z                                 | 2                                                                              |                            |
| Density (calculated)              | 1.750 Mg/m <sup>3</sup>                                                        |                            |
| Absorption coefficient            | 7.320 mm <sup>-1</sup>                                                         |                            |
| F(000)                            | 1064                                                                           |                            |
| Crystal size                      | 0.20 x 0.20 x 0.10 mm <sup>3</sup>                                             |                            |
| Theta range for data collection   | 1.56 to 1.56 °                                                                 |                            |
| Index ranges                      | -16 ≤ h ≤ 16, -19 ≤ k ≤ 21, 0 ≤ l ≤ 23                                         |                            |
| Reflections collected             | 15820                                                                          |                            |
| Independent reflections           | 13265 [R(int) = 0.0000]                                                        |                            |
| Completeness to theta = 33.32 °   | 0.989 %                                                                        |                            |
| Absorption correction             | Empirical (TWINABS)                                                            |                            |
| Max. and min. transmission        | 0.5281 and 0.3222                                                              |                            |
| Refinement method                 | Full-matrix least-squares on F <sup>2</sup>                                    |                            |
| Data / restraints / parameters    | 15820 / 0 / 446                                                                |                            |
| Goodness-of-fit on F <sup>2</sup> | 1.032                                                                          |                            |
| Final R indices [I > 2σ(I)]       | R1 = 0.0729, wR2 = 0.1911                                                      |                            |
| R indices (all data)              | R1 = 0.0863, wR2 = 0.2084                                                      |                            |
| Largest diff. peak and hole       | 11.419 and -6.610 e.Å <sup>-3</sup>                                            |                            |

### 4.3. Crystal data and structure refinement for complex **1b**

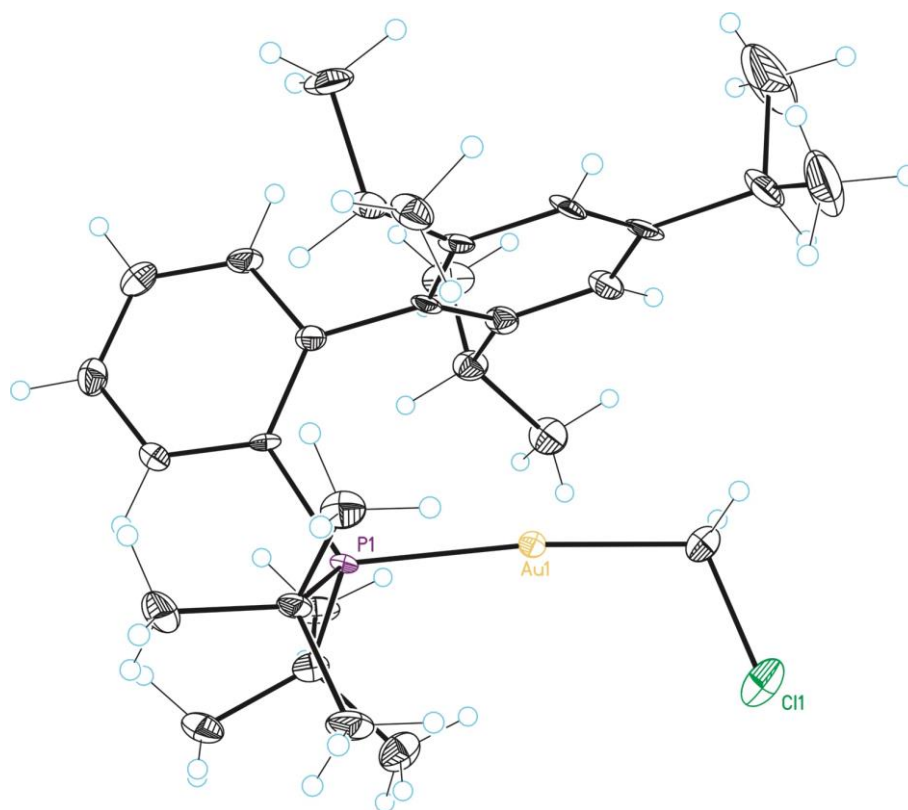

|                                   |                                                |                              |
|-----------------------------------|------------------------------------------------|------------------------------|
| Empirical formula                 | C <sub>30</sub> H <sub>47</sub> Au Cl P        |                              |
| Formula weight                    | 671.06                                         |                              |
| Temperature                       | 100(2) K                                       |                              |
| Wavelength                        | 0.71073 Å                                      |                              |
| Crystal system                    | Monoclinic                                     |                              |
| Space group                       | P2(1)/c                                        |                              |
| Unit cell dimensions              | a = 20.5365(8) Å                               | $\alpha = 90.00^\circ$       |
|                                   | b = 8.9497(4) Å                                | $\beta = 104.0760(10)^\circ$ |
|                                   | c = 16.4737(6) Å                               | $\gamma = 90.00^\circ$       |
| Volume                            | 2936.9(2) Å <sup>3</sup>                       |                              |
| Z                                 | 4                                              |                              |
| Density (calculated)              | 1.518 Mg/m <sup>3</sup>                        |                              |
| Absorption coefficient            | 5.170 mm <sup>-1</sup>                         |                              |
| F(000)                            | 1352                                           |                              |
| Crystal size                      | 0.30 x 0.30 x 0.30 mm <sup>3</sup>             |                              |
| Theta range for data collection   | 1.02 to 29.95 °                                |                              |
| Index ranges                      | -25 <= h <= 26, -12 <= k <= 11, -22 <= l <= 16 |                              |
| Reflections collected             | 30282                                          |                              |
| Independent reflections           | 7571 [R(int) = 0.0611 ]                        |                              |
| Completeness to theta = 29.95 °   | 0.888 %                                        |                              |
| Absorption correction             | Empirical                                      |                              |
| Max. and min. transmission        | 0.224 and 0.212                                |                              |
| Refinement method                 | Full-matrix least-squares on F <sup>2</sup>    |                              |
| Data / restraints / parameters    | 7571 / 0 / 310                                 |                              |
| Goodness-of-fit on F <sup>2</sup> | 1.071                                          |                              |
| Final R indices [I > 2sigma(I)]   | R1 = 0.0512, wR2 = 0.1431                      |                              |
| R indices (all data)              | R1 = 0.0570, wR2 = 0.1493                      |                              |
| Largest diff. peak and hole       | 5.340 and -3.785 e.Å <sup>-3</sup>             |                              |

#### 4.4. Crystal data and structure refinement for complex **1c**

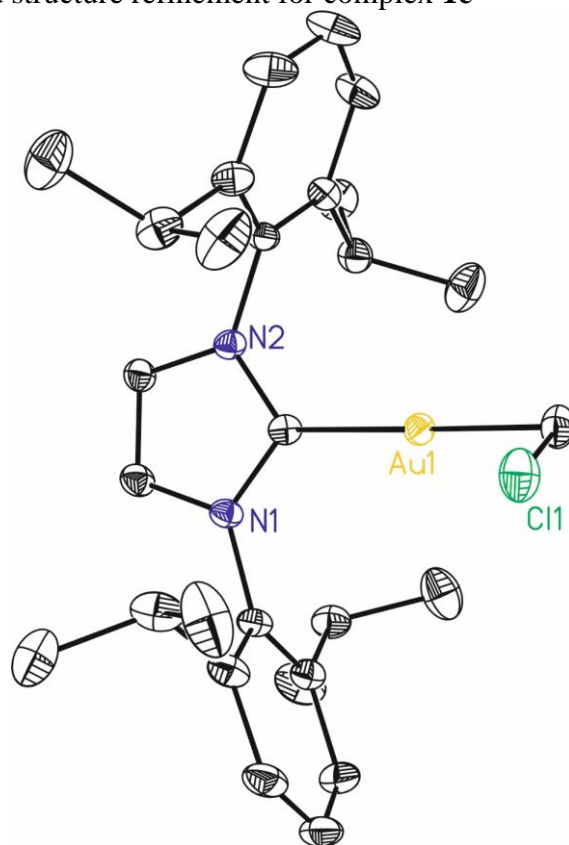

|                                   |                                                      |                            |
|-----------------------------------|------------------------------------------------------|----------------------------|
| Empirical formula                 | C <sub>28</sub> H <sub>38</sub> Au Cl N <sub>2</sub> |                            |
| Formula weight                    | 635.02                                               |                            |
| Temperature                       | 100(2) K                                             |                            |
| Wavelength                        | 0.71073 Å                                            |                            |
| Crystal system                    | Triclinic                                            |                            |
| Space group                       | P-1                                                  |                            |
| Unit cell dimensions              | a = 9.8883(11) Å                                     | $\alpha = 88.838(3)^\circ$ |
|                                   | b = 11.5073(13) Å                                    | $\beta = 88.638(3)^\circ$  |
|                                   | c = 12.2747(14) Å                                    | $\gamma = 83.728(3)^\circ$ |
| Volume                            | 1387.7(3) Å <sup>3</sup>                             |                            |
| Z                                 | 2                                                    |                            |
| Density (calculated)              | 1.520 Mg/m <sup>3</sup>                              |                            |
| Absorption coefficient            | 5.414 mm <sup>-1</sup>                               |                            |
| F(000)                            | 632                                                  |                            |
| Crystal size                      | 0.30 x 0.20 x 0.20 mm <sup>3</sup>                   |                            |
| Theta range for data collection   | 2.072 to 35.077°                                     |                            |
| Index ranges                      | -15 ≤ h ≤ 12, -14 ≤ k ≤ 18, -19 ≤ l ≤ 19             |                            |
| Reflections collected             | 23948                                                |                            |
| Independent reflections           | 11088 [R(int) = 0.0177]                              |                            |
| Completeness to theta = 35.077°   | 90.3%                                                |                            |
| Absorption correction             | Multi-scan                                           |                            |
| Max. and min. transmission        | 0.411 and 0.337                                      |                            |
| Refinement method                 | Full-matrix least-squares on F <sup>2</sup>          |                            |
| Data / restraints / parameters    | 11088 / 0 / 297                                      |                            |
| Goodness-of-fit on F <sup>2</sup> | 1.073                                                |                            |
| Final R indices [I > 2σ(I)]       | R1 = 0.0190, wR2 = 0.0454                            |                            |
| R indices (all data)              | R1 = 0.0216, wR2 = 0.0462                            |                            |
| Largest diff. peak and hole       | 2.151 and -1.303 e.Å <sup>-3</sup>                   |                            |

#### 4.5. Crystal data and structure refinement for complex **8**

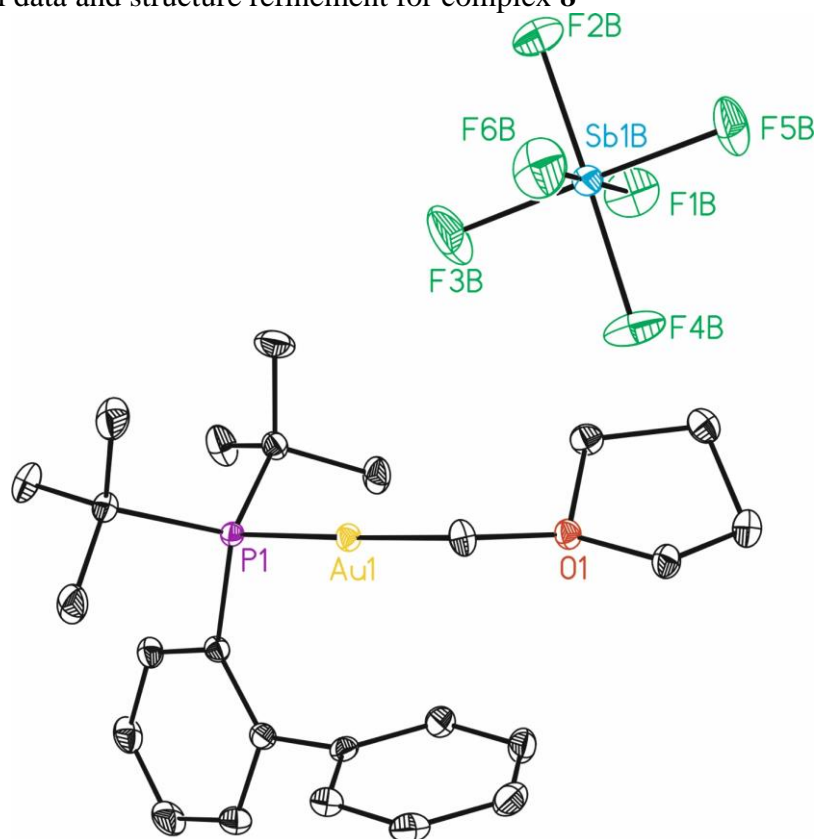

|                                   |                                                          |                                |
|-----------------------------------|----------------------------------------------------------|--------------------------------|
| Empirical formula                 | C <sub>25</sub> H <sub>37</sub> Au F <sub>6</sub> O P Sb |                                |
| Formula weight                    | 817.23                                                   |                                |
| Temperature                       | 100(2) K                                                 |                                |
| Wavelength                        | 0.71073 Å                                                |                                |
| Crystal system                    | Monoclinic                                               |                                |
| Space group                       | P2(1)/n                                                  |                                |
| Unit cell dimensions              | a = 13.6064(7) Å                                         | $\alpha = 90^\circ$ .          |
|                                   | b = 9.3096(5) Å                                          | $\beta = 105.7134(12)^\circ$ . |
|                                   | c = 23.0909(12) Å                                        | $\gamma = 90^\circ$ .          |
| Volume                            | 2815.6(3) Å <sup>3</sup>                                 |                                |
| Z                                 | 4                                                        |                                |
| Density (calculated)              | 1.928 Mg/m <sup>3</sup>                                  |                                |
| Absorption coefficient            | 6.277 mm <sup>-1</sup>                                   |                                |
| F(000)                            | 1576                                                     |                                |
| Crystal size                      | 0.30 x 0.01 x 0.01 mm <sup>3</sup>                       |                                |
| Theta range for data collection   | 1.832 to 34.453°.                                        |                                |
| Index ranges                      | -20 ≤ h ≤ 21, -11 ≤ k ≤ 14, -28 ≤ l ≤ 36                 |                                |
| Reflections collected             | 42197                                                    |                                |
| Independent reflections           | 11560 [R(int) = 0.0276]                                  |                                |
| Completeness to theta = 34.453°   | 97.2%                                                    |                                |
| Absorption correction             | Multi-scan                                               |                                |
| Max. and min. transmission        | 0.940 and 0.647                                          |                                |
| Refinement method                 | Full-matrix least-squares on F <sup>2</sup>              |                                |
| Data / restraints / parameters    | 11560 / 0 / 322                                          |                                |
| Goodness-of-fit on F <sup>2</sup> | 1.032                                                    |                                |
| Final R indices [I > 2σ(I)]       | R1 = 0.0216, wR2 = 0.0432                                |                                |
| R indices (all data)              | R1 = 0.0307, wR2 = 0.0456                                |                                |
| Largest diff. peak and hole       | 1.766 and -0.676 e.Å <sup>-3</sup>                       |                                |

#### 4.6. Crystal data and structure refinement for complex **9**

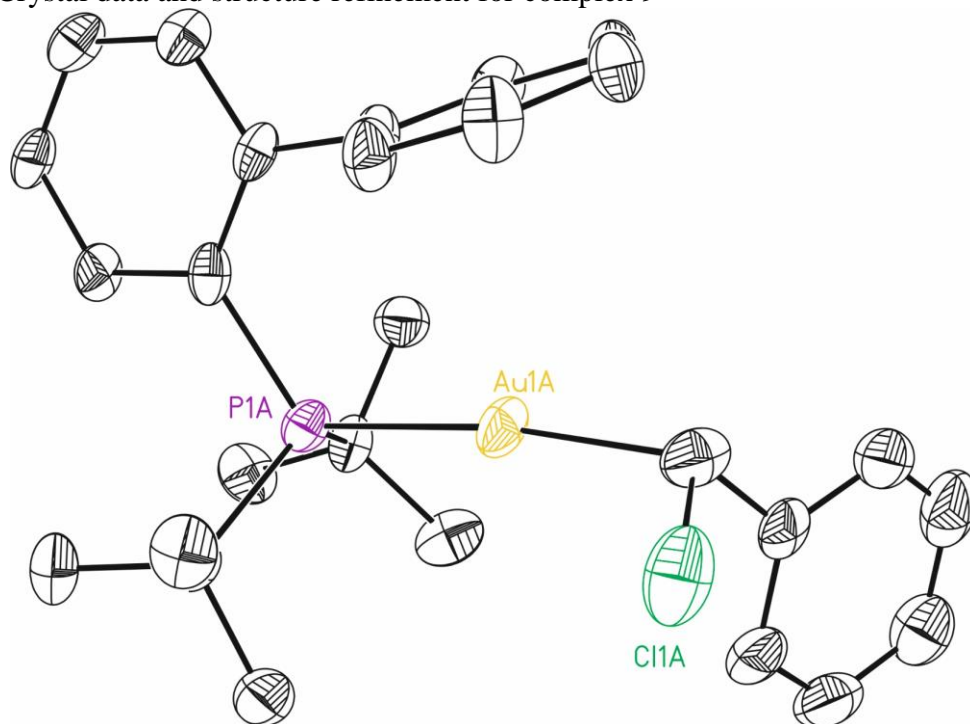

|                                   |                                                                                      |                  |
|-----------------------------------|--------------------------------------------------------------------------------------|------------------|
| Empirical formula                 | C <sub>56.33</sub> H <sub>68.67</sub> Au <sub>2</sub> Cl <sub>2</sub> P <sub>2</sub> |                  |
| Formula weight                    | 1272.55                                                                              |                  |
| Temperature                       | 100(2) K                                                                             |                  |
| Wavelength                        | 0.71073 Å                                                                            |                  |
| Crystal system                    | Monoclinic                                                                           |                  |
| Space group                       | P2(1)/n                                                                              |                  |
| Unit cell dimensions              | a = 20.8103(14) Å                                                                    | α = 90°.         |
|                                   | b = 10.4355(6) Å                                                                     | β = 103.897(2)°. |
|                                   | c = 36.623(3) Å                                                                      | γ = 90°.         |
| Volume                            | 7720.6(9) Å <sup>3</sup>                                                             |                  |
| Z                                 | 6                                                                                    |                  |
| Density (calculated)              | 1.642 Mg/m <sup>3</sup>                                                              |                  |
| Absorption coefficient            | 5.896 mm <sup>-1</sup>                                                               |                  |
| F(000)                            | 3772                                                                                 |                  |
| Crystal size                      | 0.20 x 0.12 x 0.03 mm <sup>3</sup>                                                   |                  |
| Theta range for data collection   | 1.033 to 27.349°.                                                                    |                  |
| Index ranges                      | -20 ≤ h ≤ 26, -12 ≤ k ≤ 13, -47 ≤ l ≤ 40                                             |                  |
| Reflections collected             | 53754                                                                                |                  |
| Independent reflections           | 17186 [R(int) = 0.0812]                                                              |                  |
| Completeness to theta = 27.349°   | 98.299995%                                                                           |                  |
| Absorption correction             | Multi-scan                                                                           |                  |
| Max. and min. transmission        | 0.843 and 0.385                                                                      |                  |
| Refinement method                 | Full-matrix least-squares on F <sup>2</sup>                                          |                  |
| Data / restraints / parameters    | 17186 / 120 / 893                                                                    |                  |
| Goodness-of-fit on F <sup>2</sup> | 0.941                                                                                |                  |
| Final R indices [I > 2σ(I)]       | R1 = 0.0598, wR2 = 0.1542                                                            |                  |
| R indices (all data)              | R1 = 0.0883, wR2 = 0.1702                                                            |                  |
| Largest diff. peak and hole       | 5.522 and -2.700 e.Å <sup>-3</sup>                                                   |                  |

## 5. DFT calculations

All density functional calculations were performed using the Gaussian09 suite.<sup>[6]</sup> The functional B3LYP was used in conjunction with Grimme's D3 dispersion correction using a 6-31G(p,d) + SDD(f,g) for Au basis set. Additionally, the Polarizable Continuum Model (PCM) was used to simulate toluene as solvent throughout all calculations. All structures were fully optimized prior frequency analysis. No imaginary frequencies for minima and a single imaginary frequency corresponding to the reaction coordinate in the case of the transition states were found.

### 5.1. Fully dissociative mechanism

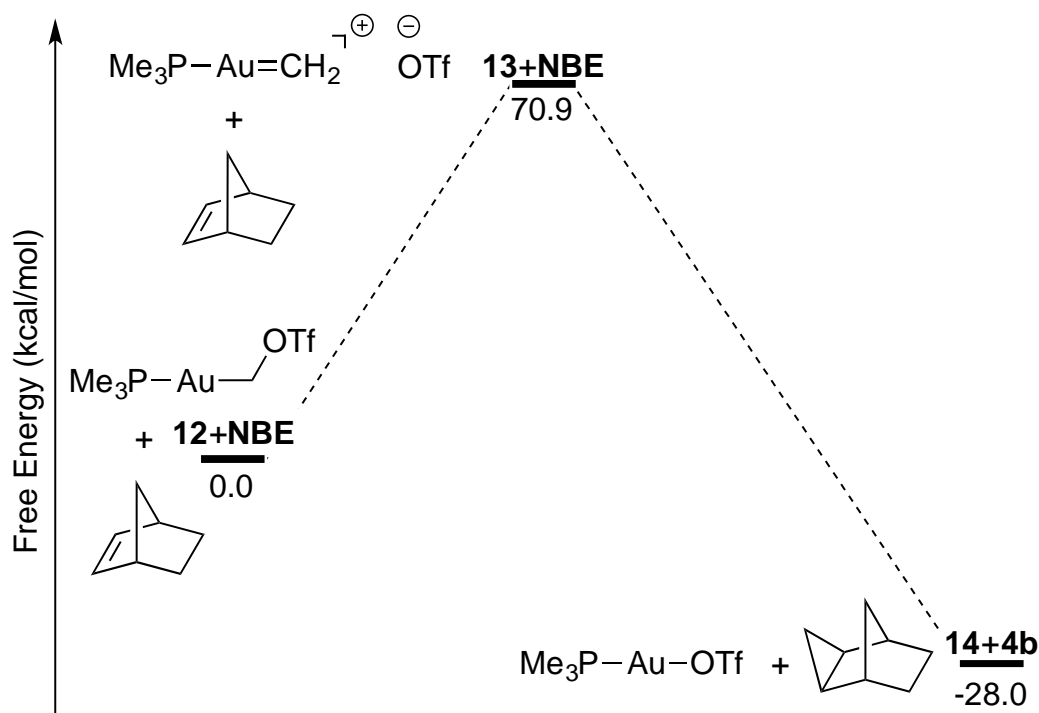

**Figure S31.** Fully dissociative mechanism for the cyclopropanation of norbornene.

**12**

$G_{298K} = -1597.560721$  Ha

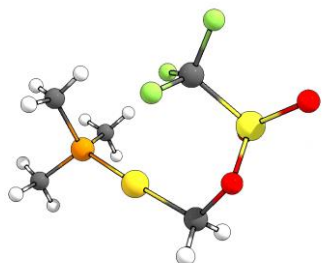

|   |             |              |              |
|---|-------------|--------------|--------------|
| P | 2.539235000 | 0.631858000  | 0.143403000  |
| C | 4.165844000 | 0.063351000  | -0.496817000 |
| H | 4.452748000 | -0.860303000 | 0.011875000  |
| H | 4.082269000 | -0.141405000 | -1.567041000 |
| H | 4.935134000 | 0.823679000  | -0.330777000 |
| C | 2.272070000 | 2.250771000  | -0.686319000 |
| H | 2.191184000 | 2.092388000  | -1.764691000 |
| H | 1.332564000 | 2.679126000  | -0.330270000 |
| H | 3.096311000 | 2.939538000  | -0.478789000 |
| C | 2.881695000 | 1.083071000  | 1.892001000  |
| H | 1.979100000 | 1.512304000  | 2.333830000  |
| H | 3.145736000 | 0.183187000  | 2.453054000  |
| H | 3.700420000 | 1.806261000  | 1.955371000  |

|    |              |              |              |
|----|--------------|--------------|--------------|
| Au | 0.720979000  | -0.814220000 | -0.123211000 |
| C  | -0.962303000 | -2.030384000 | -0.331049000 |
| H  | -0.933198000 | -2.655755000 | -1.225887000 |
| H  | -1.135817000 | -2.675583000 | 0.534923000  |
| O  | -2.268736000 | -1.304856000 | -0.555383000 |
| S  | -2.724038000 | -0.162895000 | 0.449669000  |
| C  | -1.965522000 | 1.401727000  | -0.322176000 |
| F  | -0.971726000 | 1.862193000  | 0.451257000  |
| F  | -1.486535000 | 1.148858000  | -1.543354000 |
| F  | -2.909983000 | 2.335618000  | -0.406762000 |
| O  | -4.161925000 | -0.006624000 | 0.282926000  |
| O  | -2.112372000 | -0.311373000 | 1.766485000  |

**NBE (Norbornene)**

$G_{298K} = -272.624595$  Ha

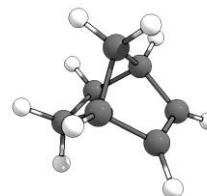

|   |             |             |              |
|---|-------------|-------------|--------------|
| C | 1.279703000 | 0.670622000 | -0.506109000 |
| C | 0.087338000 | 1.128372000 | 0.323826000  |

|   |              |              |              |
|---|--------------|--------------|--------------|
| C | 0.087819000  | -1.128290000 | 0.324015000  |
| C | 1.280193000  | -0.670254000 | -0.505730000 |
| H | 1.919352000  | 1.328980000  | -1.084701000 |
| H | 1.919226000  | -1.328390000 | -1.085253000 |
| C | 0.037184000  | 0.000113000  | 1.381419000  |
| H | -0.884190000 | -0.000037000 | 1.975943000  |
| H | 0.904543000  | 0.000348000  | 2.048100000  |
| C | -1.189701000 | 0.780848000  | -0.518893000 |
| H | -2.086811000 | 1.176791000  | -0.031203000 |
| H | -1.141814000 | 1.207261000  | -1.524461000 |
| C | -1.189254000 | -0.781347000 | -0.518934000 |
| H | -2.086230000 | -1.177785000 | -0.031403000 |
| H | -1.141001000 | -1.207692000 | -1.524513000 |
| H | 0.118270000  | 2.156855000  | 0.689794000  |
| H | 0.119014000  | -2.156709000 | 0.690136000  |

### 13 (PMe<sub>3</sub>AuCH<sub>2</sub>)

G<sub>298K</sub> = -635.899159 Ha

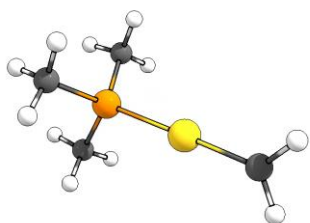

|    |              |              |              |
|----|--------------|--------------|--------------|
| P  | 1.580538000  | 0.003347000  | 0.002855000  |
| C  | 2.314033000  | -0.996481000 | -1.346168000 |
| H  | 1.979713000  | -2.032560000 | -1.257326000 |
| H  | 1.997217000  | -0.601924000 | -2.314196000 |
| H  | 3.405082000  | -0.958584000 | -1.277579000 |
| C  | 2.312704000  | 1.673861000  | -0.161017000 |
| H  | 1.999277000  | 2.120503000  | -1.107507000 |
| H  | 1.968559000  | 2.306392000  | 0.660812000  |
| H  | 3.403915000  | 1.605315000  | -0.135174000 |
| C  | 2.270782000  | -0.687758000 | 1.553621000  |
| H  | 1.940279000  | -0.085135000 | 2.402602000  |
| H  | 1.920093000  | -1.713632000 | 1.687392000  |
| H  | 3.363411000  | -0.678915000 | 1.504847000  |
| Au | -0.806141000 | 0.000180000  | -0.010961000 |
| C  | -2.767685000 | 0.003961000  | 0.041115000  |
| H  | -3.387210000 | 0.908212000  | 0.046865000  |
| H  | -3.392303000 | -0.895602000 | 0.087069000  |

### 13 (OTf)

G<sub>298K</sub> = -961.548587 Ha

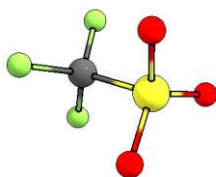

|   |              |              |              |
|---|--------------|--------------|--------------|
| O | 1.242651000  | 1.296023000  | -0.639995000 |
| S | 0.916521000  | 0.000114000  | 0.000117000  |
| C | -0.944517000 | 0.000551000  | 0.000453000  |
| F | -1.438711000 | 1.074203000  | 0.650698000  |
| F | -1.435651000 | 0.026545000  | -1.255498000 |
| F | -1.436099000 | -1.100633000 | 0.604879000  |
| O | 1.238902000  | -1.202490000 | -0.802977000 |
| O | 1.243061000  | -0.094305000 | 1.442309000  |

### 14

G<sub>298K</sub> = -1558.321249 Ha

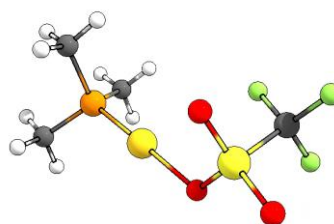

|    |              |              |              |
|----|--------------|--------------|--------------|
| P  | -2.772206000 | 0.318137000  | 0.179152000  |
| C  | -3.083326000 | 0.596984000  | 1.963664000  |
| H  | -2.903710000 | -0.331322000 | 2.510650000  |
| H  | -2.394959000 | 1.359090000  | 2.336015000  |
| H  | -4.115298000 | 0.923818000  | 2.121898000  |
| C  | -3.227174000 | 1.895581000  | -0.636393000 |
| H  | -2.539740000 | 2.680882000  | -0.313767000 |
| H  | -3.142950000 | 1.780204000  | -1.719432000 |
| H  | -4.252448000 | 2.174790000  | -0.376047000 |
| C  | -4.060029000 | -0.874941000 | -0.348064000 |
| H  | -3.984831000 | -1.036956000 | -1.425754000 |
| H  | -3.900594000 | -1.827940000 | 0.161514000  |
| H  | -5.054589000 | -0.489884000 | -0.103947000 |
| Au | -0.667928000 | -0.352044000 | -0.252034000 |
| O  | 1.279194000  | -0.997315000 | -0.705400000 |
| S  | 2.412621000  | -0.746837000 | 0.312991000  |
| C  | 2.823471000  | 1.032614000  | -0.064549000 |
| F  | 3.176135000  | 1.170772000  | -1.346159000 |
| F  | 1.748598000  | 1.811686000  | 0.167765000  |
| F  | 3.825897000  | 1.446033000  | 0.715221000  |
| O  | 1.933355000  | -0.738580000 | 1.701854000  |
| O  | 3.607864000  | -1.514318000 | -0.033330000 |

### 4b

G<sub>298K</sub> = -311.908741 Ha

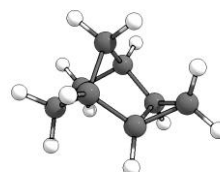

|   |              |              |              |
|---|--------------|--------------|--------------|
| C | 2.120119000  | 0.000072000  | 0.015055000  |
| H | 2.331188000  | -0.001037000 | 1.080337000  |
| H | 3.016114000  | -0.000411000 | -0.599445000 |
| C | 0.945609000  | 0.762156000  | -0.551365000 |
| C | -0.244419000 | 1.135453000  | 0.339681000  |
| C | -0.244119000 | -1.135653000 | 0.339188000  |
| C | 0.945588000  | -0.761477000 | -0.551979000 |
| H | 1.081472000  | 1.323274000  | -1.472542000 |
| H | 1.081761000  | -1.322258000 | -1.473303000 |
| C | -0.275372000 | -0.000303000 | 1.385620000  |
| H | -1.201519000 | -0.000641000 | 1.969561000  |
| H | 0.562769000  | -0.000090000 | 2.085451000  |
| C | -1.511270000 | 0.784942000  | -0.491157000 |
| H | -2.412935000 | 1.180568000  | -0.011413000 |
| H | -1.465704000 | 1.204681000  | -1.501196000 |
| C | -1.511206000 | -0.784916000 | -0.491183000 |
| H | -2.412724000 | -1.180683000 | -0.011286000 |
| H | -1.465846000 | -1.204598000 | -1.501246000 |
| H | -0.232318000 | 2.154513000  | 0.736504000  |
| H | -0.231834000 | -2.154978000 | 0.735423000  |

## 5.2. Concerted cyclopropanation (Simmons-Smith's type TS)

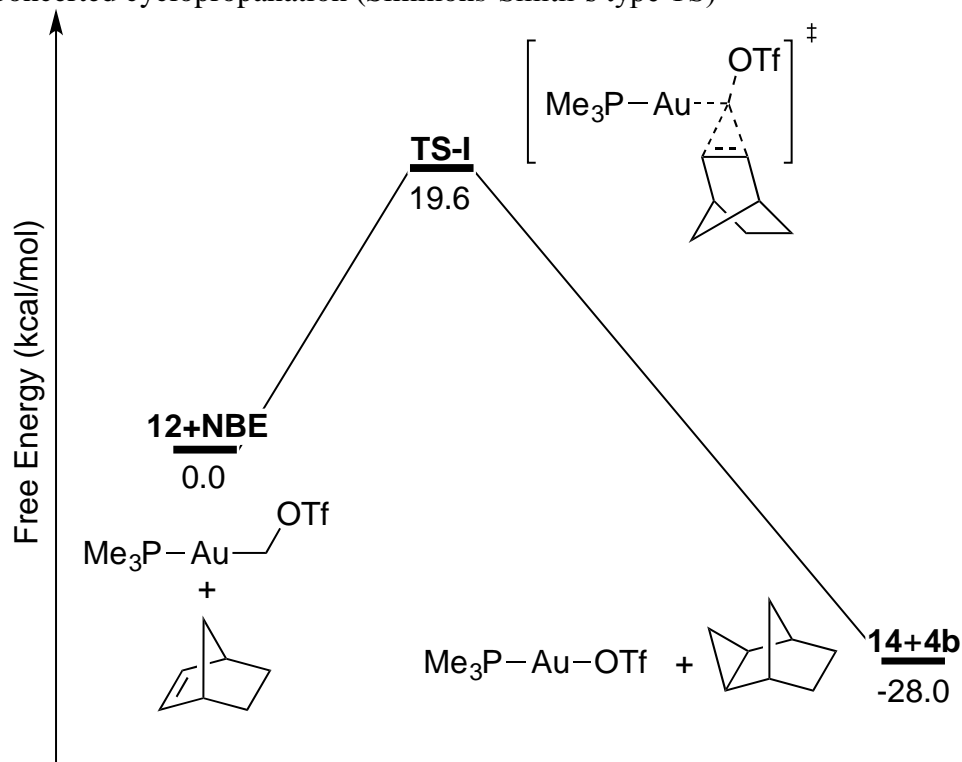

**Figure S32.** Concerted Simmons-Smith type TS for the cyclopropanation of norbornene.

### TS-I

$G_{298\text{K}} = -1870.154079 \text{ Ha}$

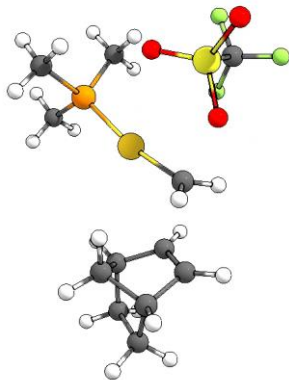

|    |              |              |              |
|----|--------------|--------------|--------------|
| C  | -0.795882000 | -1.432025000 | 0.090397000  |
| H  | -0.671164000 | -2.143990000 | -0.719769000 |
| H  | -1.195881000 | -1.888841000 | 0.990973000  |
| Au | -0.232271000 | 0.524986000  | -0.011542000 |
| P  | 0.855121000  | 2.579968000  | 0.046505000  |
| C  | 1.373721000  | 3.005433000  | 1.753469000  |
| H  | 1.944270000  | 2.159047000  | 2.142397000  |
| H  | 0.492262000  | 3.158562000  | 2.380840000  |
| H  | 1.989745000  | 3.909738000  | 1.757889000  |
| C  | 2.435105000  | 2.505931000  | -0.884255000 |
| H  | 2.999241000  | 3.435303000  | -0.761387000 |
| H  | 3.013952000  | 1.663544000  | -0.499303000 |
| H  | 2.230620000  | 2.338524000  | -1.944498000 |

|   |              |              |              |
|---|--------------|--------------|--------------|
| C | 0.002119000  | 4.080903000  | -0.583020000 |
| H | -0.920069000 | 4.239090000  | -0.018019000 |
| H | 0.644368000  | 4.960993000  | -0.481694000 |
| H | -0.254066000 | 3.939288000  | -1.636083000 |
| S | 2.423154000  | -1.601118000 | 0.883556000  |
| O | 1.071359000  | -2.264203000 | 0.781106000  |
| O | 2.391200000  | -0.186711000 | 1.321394000  |
| O | 3.437375000  | -2.461521000 | 1.506299000  |
| C | 2.956825000  | -1.484034000 | -0.901492000 |
| F | 1.987951000  | -0.936417000 | -1.670534000 |
| F | 4.046904000  | -0.706360000 | -1.007509000 |
| F | 3.239654000  | -2.693666000 | -1.395589000 |
| C | -3.000375000 | -0.868963000 | -1.037314000 |
| C | -3.783137000 | 0.258496000  | -0.383976000 |
| C | -4.241759000 | -1.633680000 | 0.766986000  |
| C | -3.284831000 | -2.004931000 | -0.352051000 |
| H | -2.509287000 | -0.800021000 | -2.000847000 |
| H | -3.045028000 | -3.019656000 | -0.648703000 |
| C | -3.772465000 | -0.196431000 | 1.092846000  |
| H | -4.484517000 | 0.353489000  | 1.716773000  |
| H | -2.780396000 | -0.150406000 | 1.548031000  |
| C | -5.282951000 | -0.019877000 | -0.753553000 |
| H | -5.909186000 | 0.813354000  | -0.420333000 |
| H | -5.426705000 | -0.132978000 | -1.831416000 |
| C | -5.602003000 | -1.324891000 | 0.043932000  |
| H | -6.386723000 | -1.156237000 | 0.787823000  |
| H | -5.923028000 | -2.149958000 | -0.597341000 |
| H | -3.434845000 | 1.268924000  | -0.601105000 |
| H | -4.317675000 | -2.341391000 | 1.593612000  |





|   |              |              |              |
|---|--------------|--------------|--------------|
| F | 4.065930000  | 0.550193000  | -1.311044000 |
| F | 5.400179000  | -1.080232000 | -0.756311000 |
| O | 4.070336000  | 0.399762000  | 1.637768000  |
| O | 3.450756000  | -2.064763000 | 1.396250000  |
| C | -3.045499000 | 0.033026000  | -0.806951000 |
| C | -4.112464000 | 0.257707000  | 0.267402000  |
| C | -3.498649000 | -1.917260000 | 0.448984000  |
| C | -2.664820000 | -1.341531000 | -0.696078000 |
| H | -3.135925000 | 0.541631000  | -1.765045000 |
| H | -2.430773000 | -1.968157000 | -1.553811000 |
| C | -3.651087000 | -0.700434000 | 1.388537000  |
| H | -4.417330000 | -0.853155000 | 2.155784000  |
| H | -2.716186000 | -0.399643000 | 1.872199000  |
| C | -5.375723000 | -0.505260000 | -0.245811000 |
| H | -6.239244000 | -0.285457000 | 0.390881000  |
| H | -5.638616000 | -0.219695000 | -1.268734000 |
| C | -4.950959000 | -2.007061000 | -0.123856000 |
| H | -5.599696000 | -2.546959000 | 0.573670000  |
| H | -4.982024000 | -2.537209000 | -1.080325000 |
| H | -4.294306000 | 1.297323000  | 0.548978000  |
| H | -3.126472000 | -2.842845000 | 0.891938000  |

19

G<sub>298K</sub>: -1870.210985 Ha

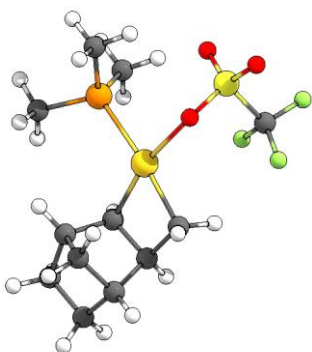

|    |              |              |              |
|----|--------------|--------------|--------------|
| P  | -0.122508000 | 2.403609000  | 0.195684000  |
| C  | 1.389638000  | 3.447315000  | 0.275743000  |
| H  | 2.062934000  | 3.058241000  | 1.043837000  |
| H  | 1.906299000  | 3.421832000  | -0.687045000 |
| H  | 1.129781000  | 4.482547000  | 0.516105000  |
| C  | -1.178160000 | 3.218516000  | -1.061334000 |
| H  | -0.720905000 | 3.110028000  | -2.047918000 |
| H  | -2.148737000 | 2.720479000  | -1.059001000 |
| H  | -1.302130000 | 4.280565000  | -0.829174000 |
| C  | -0.961021000 | 2.712629000  | 1.797720000  |
| H  | -1.917322000 | 2.187109000  | 1.782640000  |
| H  | -0.344230000 | 2.321671000  | 2.611424000  |
| H  | -1.124626000 | 3.784041000  | 1.948205000  |
| Au | 0.330128000  | 0.030601000  | -0.174224000 |
| C  | 0.962200000  | -1.959219000 | -0.269872000 |
| H  | 1.013484000  | -2.270869000 | -1.315858000 |
| H  | 0.235752000  | -2.554707000 | 0.283913000  |
| O  | -1.622442000 | -0.247100000 | -1.267018000 |
| S  | -2.983995000 | -0.235114000 | -0.587658000 |
| C  | -2.806398000 | -1.595992000 | 0.678654000  |
| F  | -2.359714000 | -2.722096000 | 0.105324000  |
| F  | -1.922512000 | -1.235572000 | 1.635196000  |
| F  | -3.981818000 | -1.839824000 | 1.262780000  |
| O  | -3.215400000 | 0.974327000  | 0.226063000  |
| O  | -4.054941000 | -0.679446000 | -1.482517000 |
| C  | 2.215688000  | -0.240568000 | 0.671164000  |
| C  | 3.380516000  | 0.350123000  | -0.134433000 |
| C  | 3.573483000  | -1.890245000 | -0.457105000 |
| C  | 2.316678000  | -1.770045000 | 0.429770000  |
| H  | 2.138967000  | 0.095923000  | 1.707378000  |
| H  | 2.407423000  | -2.365020000 | 1.344137000  |
| C  | 3.491153000  | -0.618344000 | -1.332924000 |
| H  | 4.397111000  | -0.453030000 | -1.924815000 |
| H  | 2.626390000  | -0.588474000 | -2.001910000 |
| C  | 4.663396000  | -0.019061000 | 0.665061000  |
| H  | 5.523043000  | 0.527452000  | 0.263698000  |
| H  | 4.579197000  | 0.239943000  | 1.725415000  |
| C  | 4.800899000  | -1.560906000 | 0.426277000  |
| H  | 5.730346000  | -1.794752000 | -0.102016000 |
| H  | 4.801659000  | -2.132482000 | 1.359807000  |
| H  | 3.296336000  | 1.411552000  | -0.370789000 |
| H  | 3.640865000  | -2.841910000 | -0.991323000 |

TS-V

G<sub>298K</sub>: -1870.199314 Ha

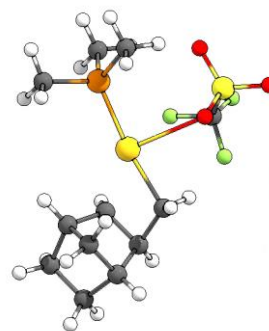

|    |              |              |              |
|----|--------------|--------------|--------------|
| P  | -0.627877000 | 2.491353000  | 0.033559000  |
| C  | 0.528297000  | 3.917634000  | 0.140961000  |
| H  | 1.190376000  | 3.787763000  | 1.000871000  |
| H  | 1.137335000  | 3.961340000  | -0.765519000 |
| H  | -0.026776000 | 4.854408000  | 0.249824000  |
| C  | -1.748449000 | 2.899046000  | -1.356320000 |
| H  | -1.186543000 | 2.893872000  | -2.293383000 |
| H  | -2.523090000 | 2.130997000  | -1.390692000 |
| C  | -2.200349000 | 3.883617000  | -1.201798000 |
| C  | -1.670196000 | 2.621746000  | 1.534785000  |
| H  | -2.453198000 | 1.864748000  | 1.461350000  |
| H  | -1.060389000 | 2.435905000  | 2.422392000  |
| H  | -2.117953000 | 3.618189000  | 1.599078000  |
| Au | 0.464868000  | 0.403088000  | -0.208956000 |
| C  | 1.273681000  | -1.559876000 | -0.747207000 |
| H  | 1.323199000  | -1.378027000 | -1.820863000 |
| H  | 0.413839000  | -2.139308000 | -0.421687000 |
| O  | -1.728040000 | -0.609890000 | -1.352716000 |
| S  | -2.981539000 | -0.792582000 | -0.556878000 |
| C  | -2.365806000 | -1.602914000 | 1.011217000  |
| F  | -1.577020000 | -2.662018000 | 0.733829000  |
| F  | -1.628522000 | -0.739917000 | 1.754904000  |
| F  | -3.384493000 | -2.023023000 | 1.767050000  |
| O  | -3.567068000 | 0.474431000  | -0.057723000 |
| O  | -3.919913000 | -1.781492000 | -1.108888000 |
| C  | 2.321514000  | -0.557205000 | 0.642472000  |
| C  | 3.512787000  | 0.321459000  | 0.263202000  |
| C  | 3.893777000  | -1.651840000 | -0.797771000 |
| C  | 2.567671000  | -1.877617000 | -0.047750000 |
| H  | 1.952996000  | -0.575244000 | 1.666252000  |
| H  | 2.546214000  | -2.777208000 | 0.567981000  |
| C  | 3.828484000  | -0.152447000 | -1.170407000 |
| H  | 4.786623000  | 0.228677000  | -1.535331000 |
| C  | 3.052662000  | 0.108697000  | -1.894679000 |
| H  | 4.708632000  | -0.295253000 | 1.053853000  |
| H  | 5.563231000  | 0.387069000  | 1.012665000  |
| H  | 4.468949000  | -0.453016000 | 2.109939000  |
| C  | 4.996037000  | -1.632193000 | 0.289719000  |
| H  | 5.989063000  | -1.618074000 | -0.168922000 |
| H  | 4.947642000  | -2.508511000 | 0.943211000  |
| H  | 3.373539000  | 1.392279000  | 0.413531000  |
| H  | 4.069406000  | -2.350585000 | -1.618869000 |

20 (cation)

G<sub>298K</sub>: -908.530086 Ha

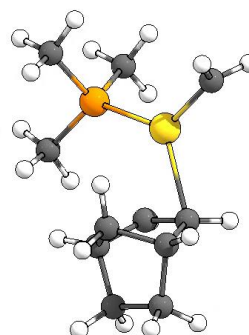

|   |             |             |              |
|---|-------------|-------------|--------------|
| P | 1.901968000 | 1.080296000 | 0.028835000  |
| C | 1.306773000 | 2.802611000 | -0.170868000 |
| H | 0.782339000 | 2.916055000 | -1.121947000 |
| H | 0.627205000 | 3.055679000 | 0.644708000  |
| H | 2.160659000 | 3.486222000 | -0.147831000 |

|    |              |              |              |   |              |              |              |
|----|--------------|--------------|--------------|---|--------------|--------------|--------------|
| C  | 2.779384000  | 1.089866000  | 1.638902000  | H | -1.884622000 | -1.282986000 | -1.587074000 |
| H  | 2.055406000  | 1.228802000  | 2.445824000  | C | -2.268816000 | 0.430645000  | 1.357493000  |
| H  | 3.284842000  | 0.132240000  | 1.780511000  | H | -2.987504000 | 0.754606000  | 2.114813000  |
| H  | 3.512588000  | 1.901475000  | 1.666015000  | H | -1.358291000 | 0.084019000  | 1.858312000  |
| C  | 3.205443000  | 0.895717000  | -1.247936000 | C | -3.472185000 | 1.683300000  | -0.284273000 |
| H  | 3.691782000  | -0.075612000 | -1.133832000 | H | -4.027803000 | 2.369854000  | 0.360224000  |
| H  | 2.752319000  | 0.948902000  | -2.241144000 | H | -3.477091000 | 2.099504000  | -1.294898000 |
| H  | 3.947852000  | 1.692762000  | -1.146397000 | C | -4.057569000 | 0.238026000  | -0.216372000 |
| Au | 0.417206000  | -0.811896000 | -0.067727000 | H | -4.908247000 | 0.180595000  | 0.467952000  |
| C  | 0.901270000  | -2.644759000 | 0.319148000  | H | -4.387917000 | -0.138194000 | -1.187812000 |
| H  | 0.871953000  | -3.095117000 | 1.316124000  | H | -1.538092000 | 2.429144000  | 0.582672000  |
| H  | 1.318517000  | -3.343555000 | -0.412467000 | H | -3.141244000 | -1.578298000 | 0.763268000  |
| C  | -1.306636000 | 0.693316000  | -0.805210000 |   |              |              |              |
| C  | -2.018241000 | 1.501911000  | 0.274342000  |   |              |              |              |
| C  | -2.865565000 | -0.599385000 | 0.373043000  |   |              |              |              |
| C  | -1.850818000 | -0.586533000 | -0.755163000 |   |              |              |              |
| H  | -0.901690000 | 1.140952000  | -1.707730000 |   |              |              |              |

5.4. Ethylene formation involving a neutral, three-coordinated carbene species.

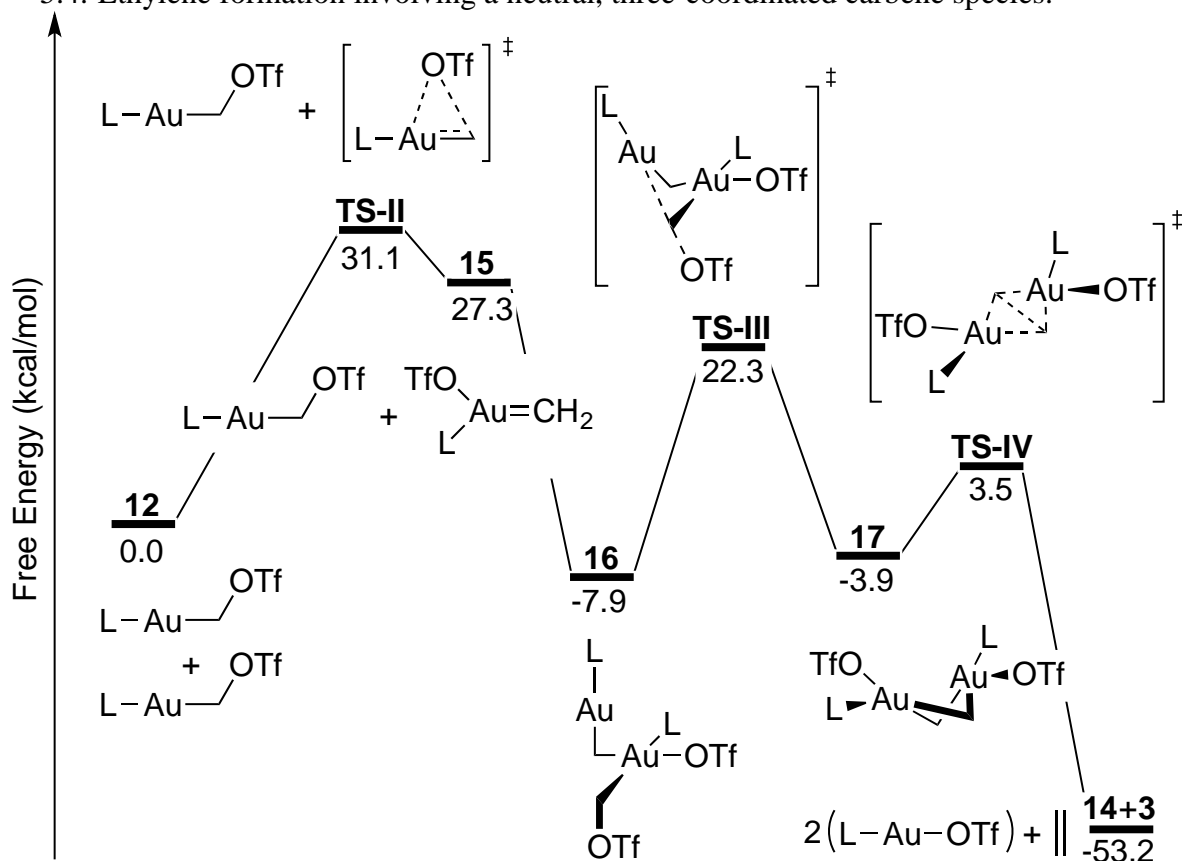

Figure S34. Ethylene formation via a neutral, three-coordinated carbene species.

16

G<sub>298K</sub>: -3195.133997 Ha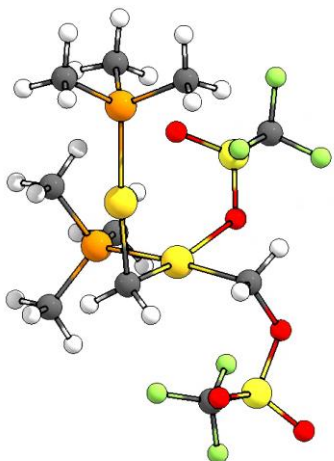

|    |              |              |              |
|----|--------------|--------------|--------------|
| P  | -0.455392000 | 0.089431000  | 2.646474000  |
| C  | -0.993029000 | 1.656393000  | 3.429203000  |
| H  | -0.320067000 | 2.451385000  | 3.107414000  |
| H  | -2.007935000 | 1.898430000  | 3.106171000  |
| H  | -0.963997000 | 1.562052000  | 4.518771000  |
| C  | -1.419773000 | -1.208920000 | 3.516337000  |
| H  | -2.474450000 | -1.114818000 | 3.248022000  |
| H  | -1.071807000 | -2.197606000 | 3.208307000  |
| H  | -1.305178000 | -1.109803000 | 4.599645000  |
| C  | 1.273198000  | -0.154292000 | 3.198007000  |
| H  | 1.631603000  | -1.120255000 | 2.833688000  |
| H  | 1.875811000  | 0.641556000  | 2.758252000  |
| H  | 1.339180000  | -0.120295000 | 4.289633000  |
| Au | -0.797394000 | 0.047107000  | 0.255519000  |
| C  | -1.284250000 | 0.031249000  | -1.778758000 |
| H  | -0.815614000 | 0.894422000  | -2.247383000 |
| H  | -1.011001000 | -0.887526000 | -2.298408000 |
| O  | -2.719285000 | 0.296459000  | -2.018228000 |
| S  | -3.793998000 | -0.851730000 | -1.717164000 |
| C  | -4.251500000 | -0.528637000 | 0.095236000  |
| F  | -3.589120000 | -1.369923000 | 0.899024000  |
| F  | -3.957878000 | 0.728265000  | 0.439488000  |
| F  | -5.557623000 | -0.733425000 | 0.234960000  |
| O  | -4.984718000 | -0.509250000 | -2.477067000 |
| O  | -3.185276000 | -2.175949000 | -1.767409000 |
| P  | 3.949428000  | -0.858689000 | -0.468167000 |
| C  | 5.321563000  | -2.030261000 | -0.115619000 |
| H  | 5.258125000  | -2.881130000 | -0.798698000 |
| H  | 5.229646000  | -2.399949000 | 0.908819000  |
| H  | 6.290958000  | -1.537655000 | -0.238216000 |
| C  | 4.283176000  | 0.576972000  | 0.630471000  |
| H  | 4.229743000  | 0.251349000  | 1.672514000  |
| H  | 3.515213000  | 1.338253000  | 0.472921000  |
| H  | 5.274193000  | 0.996522000  | 0.432176000  |
| C  | 4.332841000  | -0.218558000 | -2.147985000 |
| H  | 3.636312000  | 0.588480000  | -2.382429000 |
| H  | 4.208559000  | -1.016717000 | -2.883787000 |
| H  | 5.358697000  | 0.159919000  | -2.188974000 |
| Au | 1.755503000  | -1.618602000 | -0.195956000 |
| C  | -0.277299000 | -1.974021000 | 0.101205000  |
| H  | -0.574099000 | -2.465259000 | 1.031411000  |
| H  | -0.848287000 | -2.408997000 | -0.720334000 |
| O  | 1.373364000  | 2.447890000  | 1.235367000  |
| S  | 0.433262000  | 3.078602000  | 0.283196000  |
| C  | 1.234710000  | 2.761405000  | -1.373569000 |
| F  | 1.536222000  | 1.447518000  | -1.512811000 |
| F  | 2.374064000  | 3.452885000  | -1.474175000 |
| F  | 0.417392000  | 3.102865000  | -2.375433000 |
| O  | 0.264754000  | 4.531624000  | 0.346822000  |
| O  | -0.887630000 | 2.335861000  | 0.168921000  |

TS-III

G<sub>298K</sub>: -3195.085890 Ha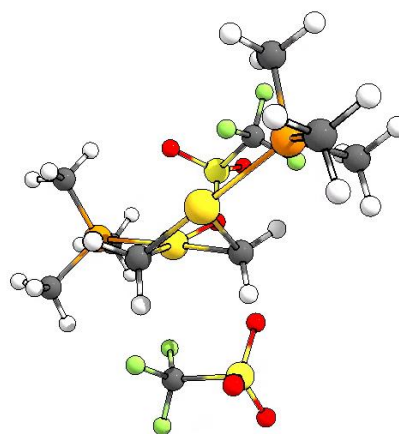

|    |              |              |              |
|----|--------------|--------------|--------------|
| Au | -0.777944000 | 0.297108000  | 0.332249000  |
| C  | 0.488932000  | -0.886369000 | -0.768455000 |
| H  | 1.085884000  | -0.455919000 | -1.569624000 |
| H  | 0.207083000  | -1.930401000 | -0.885484000 |
| C  | -0.042955000 | -1.111479000 | 1.686632000  |
| H  | -0.133715000 | -0.745308000 | 2.711707000  |
| H  | -0.608210000 | -2.027539000 | 1.508834000  |
| Au | 1.892937000  | -1.162603000 | 0.909695000  |
| P  | 4.031068000  | -0.996061000 | -0.160236000 |
| C  | 3.908309000  | -0.882241000 | -1.985969000 |
| H  | 4.908196000  | -0.837061000 | -2.426929000 |
| H  | 3.378390000  | -1.754782000 | -2.375633000 |
| H  | 3.353714000  | 0.017751000  | -2.259638000 |
| C  | 4.947664000  | 0.514157000  | 0.337538000  |
| H  | 4.329373000  | 1.387241000  | 0.116787000  |
| H  | 5.147203000  | 0.487320000  | 1.411784000  |
| H  | 5.894454000  | 0.585475000  | -0.205625000 |
| C  | 5.176160000  | -2.393802000 | 0.155729000  |
| H  | 4.720187000  | -3.320901000 | -0.200461000 |
| H  | 6.126423000  | -2.233734000 | -0.361812000 |
| H  | 5.358941000  | -2.483403000 | 1.229570000  |
| P  | -2.205823000 | 1.488142000  | 1.823523000  |
| C  | -1.271488000 | 2.539773000  | 2.994809000  |
| H  | -0.693045000 | 3.259857000  | 2.414503000  |
| H  | -1.955933000 | 3.061327000  | 3.670022000  |
| H  | -0.592713000 | 1.913589000  | 3.580099000  |
| C  | -3.217499000 | 0.382814000  | 2.876562000  |
| H  | -2.558869000 | -0.279635000 | 3.444025000  |
| H  | -3.824912000 | 0.973499000  | 3.568061000  |
| H  | -3.859485000 | -0.231296000 | 2.244706000  |
| C  | -3.391716000 | 2.586997000  | 0.972549000  |
| H  | -4.088917000 | 3.020689000  | 1.695292000  |
| H  | -2.830504000 | 3.377355000  | 0.472852000  |
| H  | -3.939944000 | 2.007985000  | 0.226272000  |
| O  | -1.044555000 | 1.794880000  | -1.290790000 |
| S  | -0.298789000 | 3.120075000  | -1.212412000 |
| O  | -0.346055000 | 3.730406000  | 0.129739000  |
| O  | -0.550383000 | 3.969534000  | -2.375398000 |
| C  | 1.493243000  | 2.596672000  | -1.391823000 |
| F  | 1.926912000  | 1.970112000  | -0.268414000 |
| F  | 2.272959000  | 3.656617000  | -1.598210000 |
| F  | 1.646257000  | 1.737342000  | -2.415238000 |
| O  | -1.669842000 | -1.148595000 | -2.194808000 |
| S  | -2.347691000 | -2.414881000 | -1.785667000 |
| O  | -1.480951000 | -3.327570000 | -0.998051000 |
| O  | -3.183947000 | -3.035331000 | -2.824130000 |
| C  | -3.605402000 | -1.833016000 | -0.504834000 |
| F  | -3.085029000 | -1.891784000 | 0.747271000  |
| F  | -3.973584000 | -0.550180000 | -0.712923000 |
| F  | -4.704040000 | -2.592104000 | -0.520471000 |

17

G<sub>298K</sub>: -3195.127713 Ha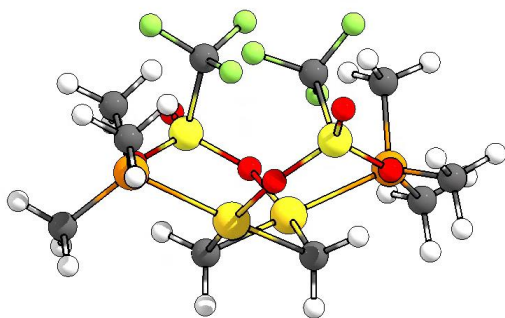

|    |              |              |              |
|----|--------------|--------------|--------------|
| P  | -2.343160000 | 2.395099000  | -0.079952000 |
| C  | -2.474869000 | 3.793049000  | -1.257284000 |
| H  | -1.504110000 | 3.947444000  | -1.735053000 |
| H  | -3.211354000 | 3.551870000  | -2.027706000 |
| H  | -2.773461000 | 4.709201000  | -0.739654000 |
| C  | -3.978978000 | 2.254001000  | 0.728892000  |
| H  | -4.730506000 | 1.984100000  | -0.016514000 |
| H  | -3.931946000 | 1.455112000  | 1.470653000  |
| H  | -4.254278000 | 3.198002000  | 1.208158000  |
| C  | -1.187426000 | 2.972039000  | 1.220978000  |
| H  | -1.106767000 | 2.198447000  | 1.986560000  |
| H  | -0.198197000 | 3.134287000  | 0.785242000  |
| H  | -1.549561000 | 3.900895000  | 1.671392000  |
| Au | -1.531190000 | 0.358365000  | -1.063559000 |
| C  | -0.436134000 | -1.253835000 | -1.807459000 |
| H  | -0.394487000 | -1.282142000 | -2.897134000 |
| H  | -0.684707000 | -2.208892000 | -1.350638000 |
| P  | 2.278852000  | -2.432504000 | -0.100048000 |
| C  | 1.196141000  | -3.906727000 | -0.180980000 |
| H  | 0.233516000  | -3.678167000 | 0.284475000  |
| H  | 1.017825000  | -4.174430000 | -1.225467000 |
| H  | 1.664924000  | -4.749991000 | 0.334316000  |
| C  | 3.874388000  | -2.931703000 | -0.850959000 |
| H  | 3.729260000  | -3.160540000 | -1.908811000 |
| H  | 4.576479000  | -2.098192000 | -0.768591000 |
| H  | 4.284514000  | -3.809264000 | -0.342732000 |
| C  | 2.638278000  | -2.204142000 | 1.681268000  |
| H  | 3.319070000  | -1.361003000 | 1.803310000  |
| H  | 1.706809000  | -1.981519000 | 2.204868000  |
| H  | 3.087441000  | -3.110356000 | 2.097947000  |
| Au | 1.338383000  | -0.454811000 | -1.101795000 |
| C  | 0.206986000  | 1.120121000  | -1.884084000 |
| H  | 0.123708000  | 1.086539000  | -2.971266000 |
| H  | 0.474189000  | 2.098322000  | -1.491329000 |
| O  | -3.194714000 | -0.743564000 | -0.090944000 |
| S  | -3.000273000 | -1.966877000 | 0.802456000  |
| O  | -2.245784000 | -3.060257000 | 0.168915000  |
| O  | -4.224356000 | -2.289471000 | 1.536881000  |
| C  | -1.815510000 | -1.316695000 | 2.097145000  |
| F  | -2.168293000 | -0.080217000 | 2.497824000  |
| F  | -0.565673000 | -1.241122000 | 1.587484000  |
| F  | -1.787228000 | -2.122300000 | 3.157226000  |
| O  | 3.095608000  | 0.634419000  | -0.274896000 |
| S  | 3.038399000  | 1.995968000  | 0.418846000  |
| O  | 2.070726000  | 2.932648000  | -0.176768000 |
| O  | 4.377629000  | 2.487853000  | 0.743964000  |
| C  | 2.264210000  | 1.554608000  | 2.058297000  |
| F  | 3.106844000  | 0.826741000  | 2.802695000  |
| F  | 1.140010000  | 0.829863000  | 1.867442000  |
| F  | 1.936443000  | 2.663463000  | 2.727106000  |

TS-IV

G<sub>298K</sub>: -3195.115855 Ha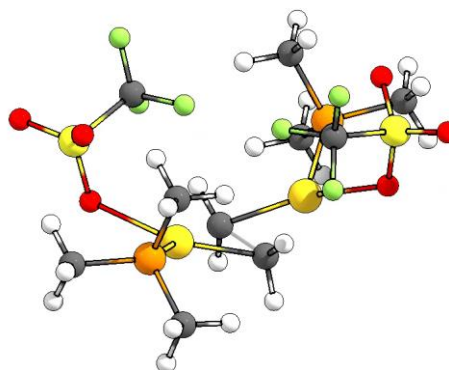

|    |              |              |              |
|----|--------------|--------------|--------------|
| P  | -3.266653000 | -1.874270000 | -0.272117000 |
| C  | -3.256842000 | -3.367999000 | -1.341456000 |
| H  | -3.634457000 | -3.112167000 | -2.334748000 |
| H  | -2.231544000 | -3.734389000 | -1.440648000 |
| H  | -3.881104000 | -4.155687000 | -0.909103000 |
| C  | -2.737808000 | -2.483024000 | 1.374447000  |
| H  | -1.699715000 | -2.819475000 | 1.315940000  |
| H  | -2.806809000 | -1.650951000 | 2.077699000  |
| H  | -3.373767000 | -3.309453000 | 1.705044000  |
| C  | -5.032865000 | -1.426069000 | -0.095017000 |
| H  | -5.102596000 | -0.603912000 | 0.618992000  |
| H  | -5.423827000 | -1.098138000 | -1.061475000 |
| H  | -5.610242000 | -2.284186000 | 0.261790000  |
| Au | -1.754539000 | -0.166462000 | -1.034168000 |
| C  | -0.085918000 | 0.982056000  | -1.599314000 |
| H  | -0.175407000 | 1.840202000  | -0.934217000 |
| H  | -0.093105000 | 1.236563000  | -2.657390000 |
| P  | 3.266614000  | 1.874303000  | -0.272210000 |
| C  | 3.256703000  | 3.368080000  | -1.341481000 |
| H  | 3.634266000  | 3.112303000  | -2.334805000 |
| H  | 2.231389000  | 3.734447000  | -1.440597000 |
| H  | 3.880968000  | 4.155766000  | -0.909129000 |
| C  | 2.737862000  | 2.482973000  | 1.374415000  |
| H  | 1.699765000  | 2.819422000  | 1.315984000  |
| H  | 2.806909000  | 1.650868000  | 2.077622000  |
| C  | 3.373836000  | 3.309390000  | 1.705014000  |
| H  | 5.032847000  | 1.426128000  | -0.095243000 |
| H  | 5.102641000  | 0.603946000  | 0.618730000  |
| H  | 5.423753000  | 1.098239000  | -1.061739000 |
| H  | 5.610233000  | 2.284242000  | 0.261557000  |
| Au | 1.754480000  | 0.166512000  | -1.034257000 |
| C  | 0.085832000  | -0.981981000 | -1.599369000 |
| H  | 0.175350000  | -1.840162000 | -0.934322000 |
| H  | 0.092960000  | -1.236433000 | -2.657458000 |
| O  | -3.025301000 | 1.622614000  | -0.372383000 |
| S  | -3.188879000 | 1.898901000  | 1.115029000  |
| O  | -3.517180000 | 0.689568000  | 1.893557000  |
| O  | -3.945119000 | 3.124743000  | 1.378203000  |
| C  | -1.437388000 | 2.293609000  | 1.654560000  |
| F  | -0.874316000 | 3.215684000  | 0.845571000  |
| F  | -0.662719000 | 1.189165000  | 1.603019000  |
| F  | -1.429348000 | 2.758501000  | 2.902487000  |
| O  | 3.025302000  | -1.622569000 | -0.372653000 |
| S  | 3.188953000  | -1.898925000 | 1.114739000  |
| O  | 3.517232000  | -0.689615000 | 1.893312000  |
| O  | 3.945263000  | -3.124744000 | 1.377818000  |
| C  | 1.437503000  | -2.293748000 | 1.654325000  |
| F  | 0.874433000  | -3.215790000 | 0.845298000  |
| F  | 0.662779000  | -1.189337000 | 1.602902000  |
| F  | 1.429547000  | -2.758729000 | 2.902220000  |

**3**  
G<sub>298K</sub>: -78.563798 Ha

|   |            |             |            |
|---|------------|-------------|------------|
| C | 0.00000000 | 0.00000000  | 0.66569200 |
| H | 0.00000000 | -0.92366600 | 1.23915600 |
| H | 0.00000000 | 0.92366600  | 1.23915600 |

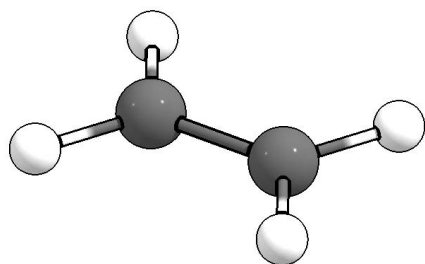

|   |            |             |             |
|---|------------|-------------|-------------|
| C | 0.00000000 | 0.00000000  | -0.66569200 |
| H | 0.00000000 | 0.92366600  | -1.23915600 |
| H | 0.00000000 | -0.92366600 | -1.23915600 |

### 5.5. Optimized structures of 7a and 15a

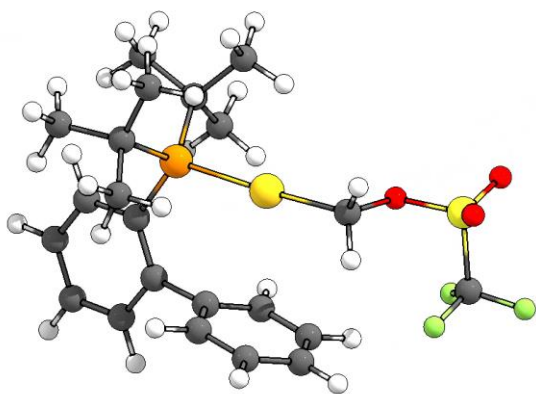

**7a**

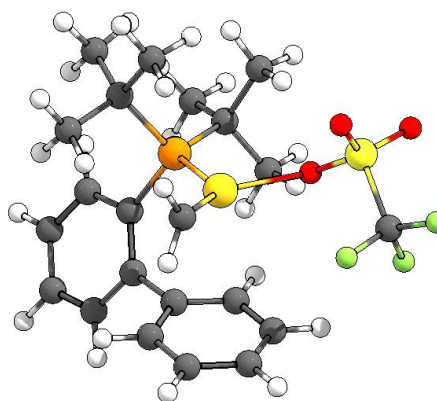

**15a**

**Figure S35. Optimized structures of 7a and 15a.**

**7a**  
G<sub>298K</sub>: -2255.989805 Ha

|    |              |              |              |
|----|--------------|--------------|--------------|
| P  | -2.233245000 | -0.660727000 | 0.061530000  |
| C  | -2.996429000 | 0.973143000  | 0.498137000  |
| C  | -2.308423000 | 2.203648000  | 0.365906000  |
| C  | -4.314882000 | 1.001478000  | 0.995341000  |
| C  | -2.962101000 | 3.393368000  | 0.732209000  |
| C  | -4.945793000 | 2.188285000  | 1.356806000  |
| H  | -4.868782000 | 0.079688000  | 1.101587000  |
| C  | -4.263665000 | 3.396876000  | 1.224271000  |
| H  | -2.421894000 | 4.329081000  | 0.624456000  |
| H  | -5.962231000 | 2.164397000  | 1.737767000  |
| H  | -4.738869000 | 4.333312000  | 1.500747000  |
| Au | 0.066607000  | -0.667629000 | -0.488968000 |
| C  | -0.910442000 | 2.364826000  | -0.141307000 |
| C  | -0.671181000 | 2.592438000  | -1.503456000 |
| C  | 0.169420000  | 2.396412000  | 0.754144000  |
| C  | 0.625640000  | 2.828046000  | -1.964287000 |
| H  | -1.503570000 | 2.584163000  | -2.200376000 |
| C  | 1.465571000  | 2.630843000  | 0.292422000  |
| H  | -0.010656000 | 2.224249000  | 1.811187000  |
| C  | 1.695631000  | 2.848171000  | -1.067621000 |
| H  | 0.798032000  | 2.999023000  | -3.022995000 |
| H  | 2.295939000  | 2.625981000  | 0.989850000  |
| H  | 2.704907000  | 3.023864000  | -1.424502000 |
| C  | -3.225049000 | -1.270771000 | -1.451473000 |
| C  | -2.445741000 | -1.778438000 | 1.609409000  |
| C  | -2.778020000 | -2.709435000 | -1.778207000 |
| H  | -3.196391000 | -3.000691000 | -2.748722000 |
| H  | -1.688573000 | -2.792218000 | -1.841620000 |
| H  | -3.139066000 | -3.429094000 | -1.038364000 |
| C  | -4.757865000 | -1.223171000 | -1.316416000 |
| H  | -5.123279000 | -0.200785000 | -1.197974000 |

|   |              |              |              |
|---|--------------|--------------|--------------|
| H | -5.199080000 | -1.623386000 | -2.236897000 |
| H | -5.133130000 | -1.825622000 | -0.487294000 |
| C | -2.815568000 | -0.336220000 | -2.612046000 |
| H | -1.740426000 | -0.376203000 | -2.808790000 |
| H | -3.342840000 | -0.645364000 | -3.522122000 |
| H | -3.089248000 | 0.702977000  | -2.404576000 |
| C | -3.852690000 | -2.353703000 | 1.853782000  |
| H | -3.828274000 | -2.951184000 | 2.772695000  |
| H | -4.614987000 | -1.586502000 | 1.996677000  |
| H | -4.170467000 | -3.017280000 | 1.045895000  |
| C | -1.462521000 | -2.966882000 | 1.488131000  |
| H | -1.566690000 | -3.597292000 | 2.379137000  |
| H | -1.663238000 | -3.590879000 | 0.614864000  |
| H | -0.423689000 | -2.632090000 | 1.431418000  |
| C | -2.012511000 | -0.916763000 | -2.815021000 |
| H | -2.720317000 | -0.110202000 | 3.021562000  |
| H | -1.953355000 | -1.553831000 | 3.704854000  |
| H | -1.022671000 | -0.475430000 | 2.654550000  |
| C | 2.090581000  | -0.781183000 | -0.959975000 |
| H | 2.369190000  | -1.603528000 | -1.623103000 |
| H | 2.459358000  | 0.157577000  | -1.381333000 |
| O | 2.835522000  | -1.005777000 | 0.331889000  |
| S | 4.431957000  | -1.070101000 | 0.311488000  |
| O | 4.863017000  | -1.730207000 | 1.536450000  |
| O | 4.954515000  | -1.449937000 | -0.997191000 |
| C | 4.845768000  | 0.737547000  | 0.536957000  |
| F | 4.225199000  | 1.217366000  | 1.619722000  |
| F | 6.163654000  | 0.872604000  | 0.688147000  |
| F | 4.453029000  | 1.436561000  | -0.537042000 |

15a

G<sub>298K</sub>: -2255.943839 Ha

|    |              |              |              |
|----|--------------|--------------|--------------|
| Au | 0.450324000  | 0.022848000  | -0.943581000 |
| C  | 0.609949000  | 0.977352000  | -2.588873000 |
| H  | 0.590786000  | 0.510879000  | -3.579440000 |
| H  | 0.473693000  | 2.061020000  | -2.655861000 |
| O  | 1.690433000  | -0.837884000 | 0.720070000  |
| S  | 3.115785000  | -1.303975000 | 0.426474000  |
| C  | 4.057661000  | 0.292855000  | 0.618323000  |
| F  | 3.657797000  | 1.191230000  | -0.297808000 |
| F  | 3.844394000  | 0.815174000  | 1.838691000  |
| F  | 5.368897000  | 0.081001000  | 0.465772000  |
| O  | 3.622684000  | -2.178339000 | 1.489232000  |
| O  | 3.320183000  | -1.701393000 | -0.974255000 |
| P  | -1.568793000 | -0.894895000 | 0.095567000  |
| C  | -2.779115000 | 0.430956000  | 0.568718000  |
| C  | -2.471519000 | 1.813940000  | 0.670742000  |
| C  | -4.113913000 | 0.032747000  | 0.787250000  |
| C  | -3.512216000 | 2.714026000  | 0.972211000  |
| C  | -5.125273000 | 0.938928000  | 1.089856000  |
| H  | -4.378601000 | -1.011819000 | 0.714300000  |
| C  | -4.821507000 | 2.295867000  | 1.180958000  |
| H  | -3.266015000 | 3.768066000  | 1.054754000  |
| H  | -6.138323000 | 0.583152000  | 1.250115000  |
| H  | -5.593418000 | 3.022099000  | 1.416977000  |
| C  | -1.131593000 | 2.438817000  | 0.469086000  |
| C  | -0.982436000 | 3.423070000  | -0.521880000 |
| C  | -0.031658000 | 2.138816000  | 1.287885000  |
| C  | 0.240984000  | 4.067141000  | -0.709058000 |
| H  | -1.830024000 | 3.670215000  | -1.154713000 |
| C  | 1.194260000  | 2.780637000  | 1.097978000  |
| H  | -0.132486000 | 1.404735000  | 2.075908000  |
| C  | 1.335470000  | 3.741287000  | 0.095440000  |

|   |              |              |              |
|---|--------------|--------------|--------------|
| H | 0.339515000  | 4.820530000  | -1.485451000 |
| H | 2.040703000  | 2.508698000  | 1.718203000  |
| H | 2.291861000  | 4.231843000  | -0.057237000 |
| C | -2.353541000 | -1.860215000 | -1.382839000 |
| C | -1.380919000 | -1.988894000 | 1.657159000  |
| C | -1.223395000 | -2.625957000 | -2.113133000 |
| H | -1.668398000 | -3.199418000 | -2.934353000 |
| H | -0.480693000 | -1.951001000 | -2.544104000 |
| H | -0.700187000 | -3.329254000 | -1.462583000 |
| C | -3.445315000 | -2.887841000 | -1.024088000 |
| H | -4.307093000 | -2.450913000 | -0.518048000 |
| H | -3.816672000 | -3.328969000 | -1.956221000 |
| H | -3.055697000 | -3.705449000 | -0.414412000 |
| C | -2.938306000 | -0.808384000 | -2.347575000 |
| H | -2.198222000 | -0.044284000 | -2.606897000 |
| H | -3.240532000 | -1.309486000 | -3.274101000 |
| H | -3.815971000 | -0.309446000 | -1.929849000 |
| C | -2.706909000 | -2.484915000 | 2.269268000  |
| H | -2.459372000 | -3.115351000 | 3.131307000  |
| H | -3.319954000 | -1.659644000 | 2.637894000  |
| H | -3.304923000 | -3.090403000 | 1.588338000  |
| C | -0.491595000 | -3.195879000 | 1.298203000  |
| H | -0.245261000 | -3.734430000 | 2.220273000  |
| H | -1.004744000 | -3.900666000 | 0.638461000  |
| H | 0.447331000  | -2.885546000 | 0.837586000  |
| C | -0.678650000 | -1.123599000 | 2.725431000  |
| H | -1.293873000 | -0.261482000 | 3.003599000  |
| H | -0.543732000 | -1.732164000 | 3.627111000  |
| H | 0.305045000  | -0.789760000 | 2.397594000  |

## 7. References

- [1] W. L. F. Armarego, C. L. L. Chai, in *Purification of Laboratory Chemicals (Fifth Edition)*, Butterworth-Heinemann, Burlington, **2003**, pp. 80-388.
- [2] D. S. Wulfman, S. Yousefian, J. M. White, *Synth. Commun.* **1988**, *18*, 2349-2352.
- [3] a) E. C. Friedrich, J. M. Domek, R. Y. Pong, *J. Org. Chem.* **1985**, *50*, 4640-4642; b) T. d. Hartog, J. M. S. Toro, P. Chen, *Org. Lett.* **2014**, *16*, 1100-1103.
- [4] U. M. Dzhemilev, V. A. Dokichev, S. Z. Sultanov, R. A. Sadykov, G. A. Tolstikov, O. M. Nefedov, *Russ. Chem. Bull.* **1991**, *40*, 945-950.
- [5] H. Eyring, *J. Chem. Phys.* **1935**, *3*, 107-115.
- [6] M. J. Frisch, G. W. Trucks, H. B. Schlegel, G. E. Scuseria, M. A. Robb, J. R. Cheeseman, G. Scalmani, V. Barone, B. Mennucci, G. A. Petersson, H. Nakatsuji, M. Caricato, X. Li, H. P. Hratchian, A. F. Izmaylov, J. Bloino, G. Zheng, J. L. Sonnenberg, M. Hada, M. Ehara, K. Toyota, R. Fukuda, J. Hasegawa, M. Ishida, T. Nakajima, Y. Honda, O. Kitao, H. Nakai, T. Vreven, J. A. Montgomery Jr., J. E. Peralta, F. Ogliaro, M. J. Bearpark, J. Heyd, E. N. Brothers, K. N. Kudin, V. N. Staroverov, R. Kobayashi, J. Normand, K. Raghavachari, A. P. Rendell, J. C. Burant, S. S. Iyengar, J. Tomasi, M. Cossi, N. Rega, N. J. Millam, M. Klene, J. E. Knox, J. B. Cross, V. Bakken, C. Adamo, J. Jaramillo, R. Gomperts, R. E. Stratmann, O. Yazyev, A. J. Austin, R. Cammi, C. Pomelli, J. W. Ochterski, R. L. Martin, K. Morokuma, V. G. Zakrzewski, G. A. Voth, P. Salvador, J. J. Dannenberg, S. Dapprich, A. D. Daniels, Ö. Farkas, J. B. Foresman, J. V. Ortiz, J. Cioslowski, D. J. Fox, Gaussian, Inc., Wallingford, CT, USA, **2009**.



## 8. NMR spectra

### 8.1. (Chloromethyl)(2-(di-*tert*-butylphosphino)biphenyl)gold (**1a**)

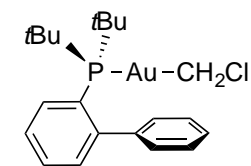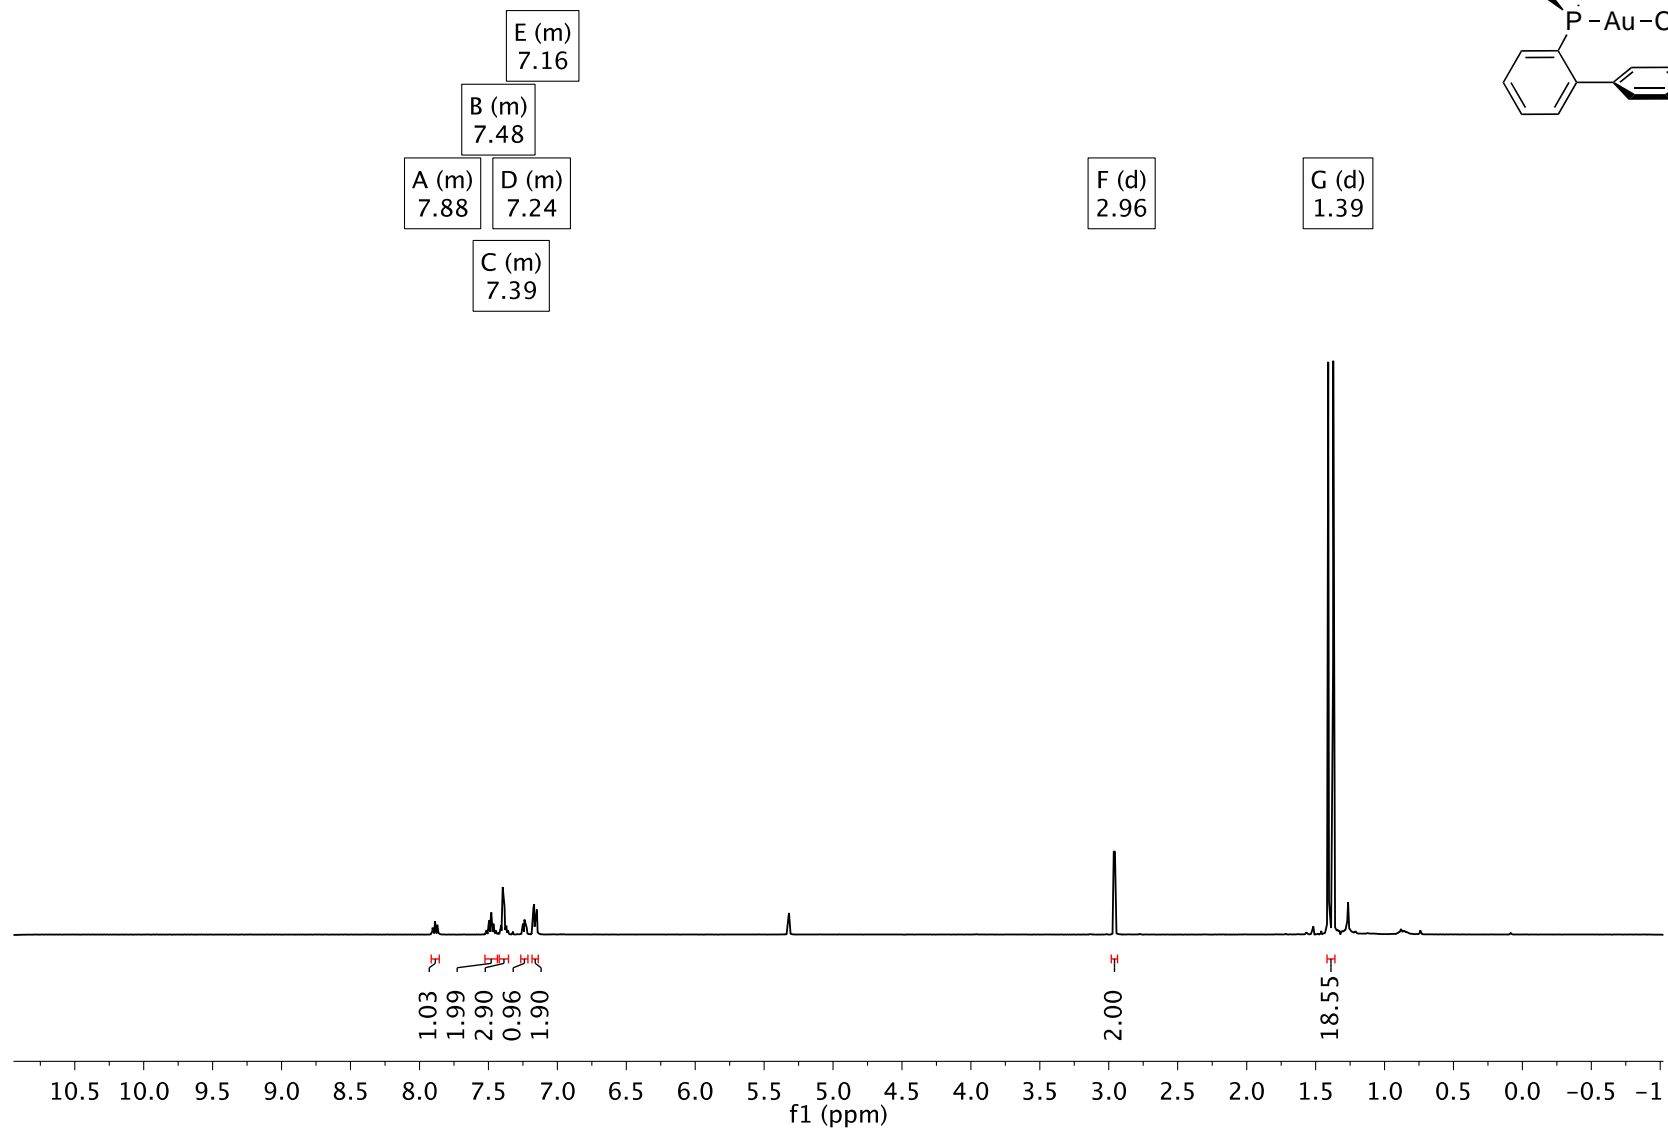

<sup>1</sup>H NMR

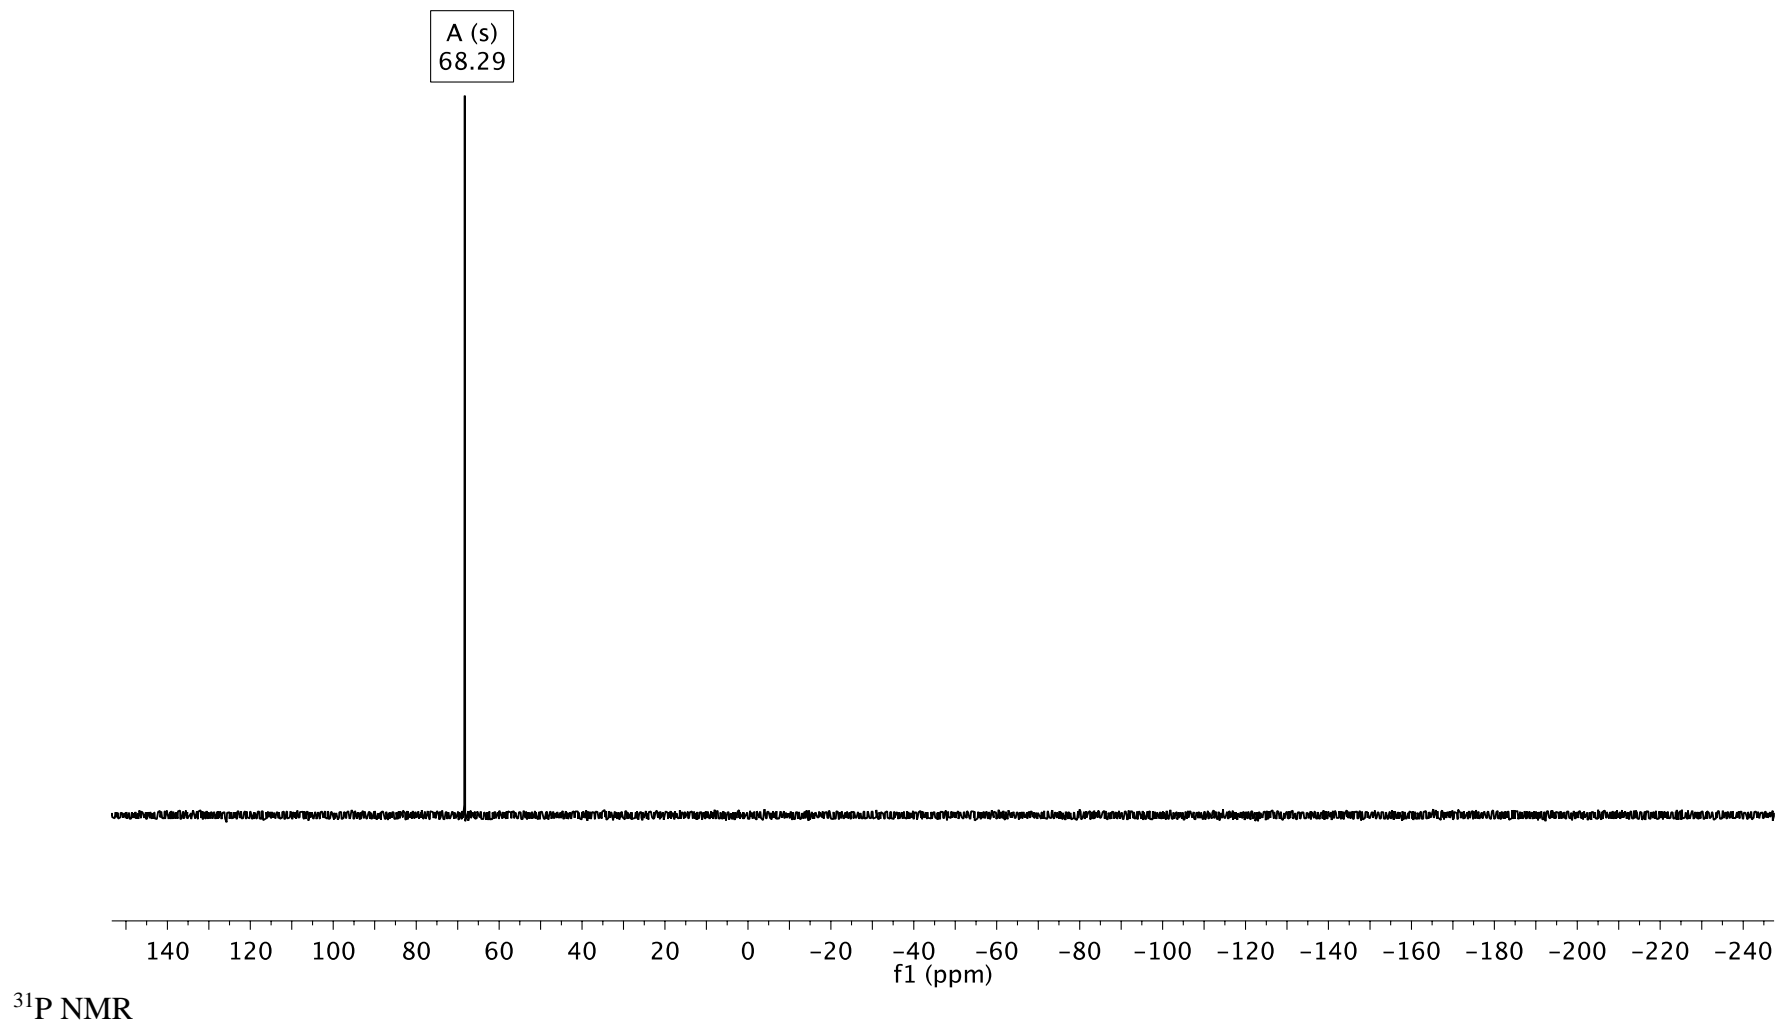

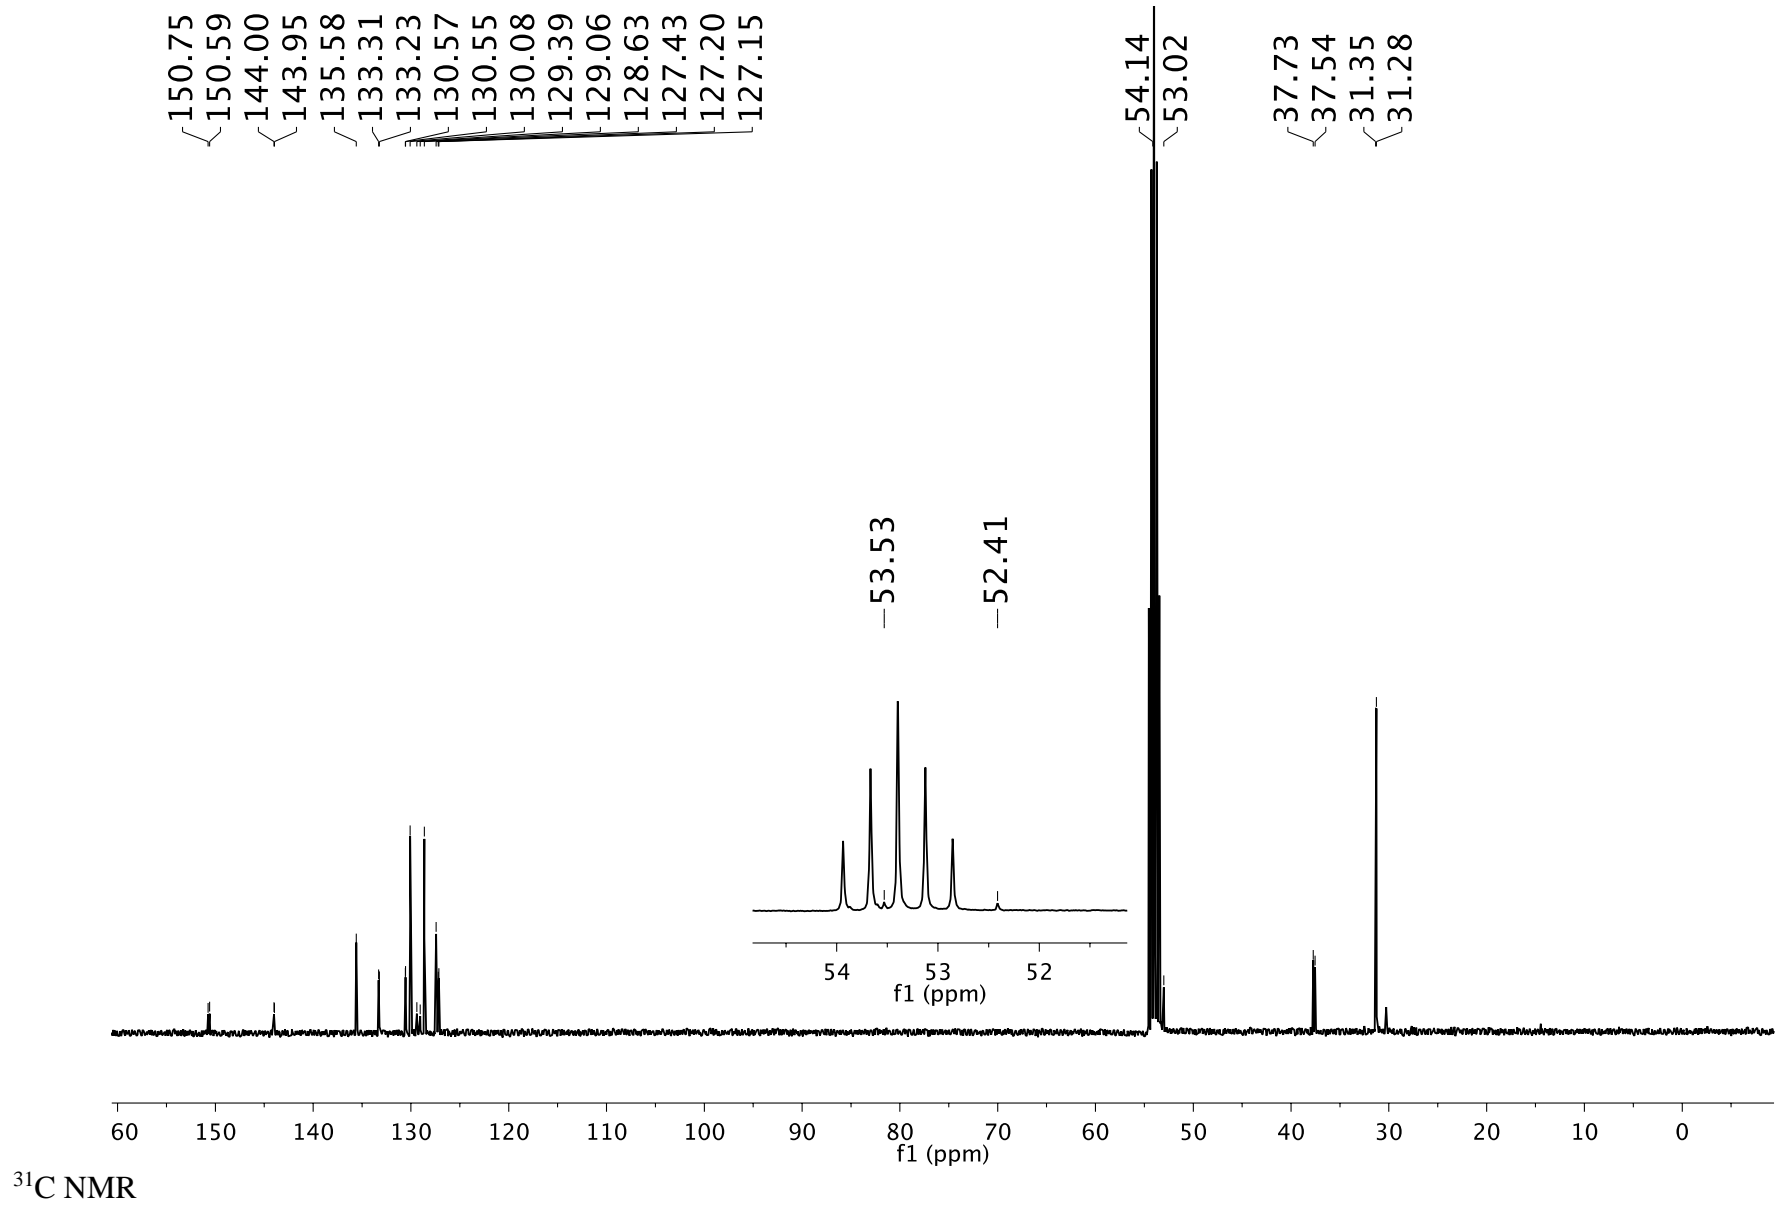

8.2. (Chloromethyl-*d*)(2-(di-*tert*-butylphosphino)biphenyl)gold (**1a-d<sub>1</sub>**)

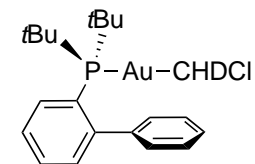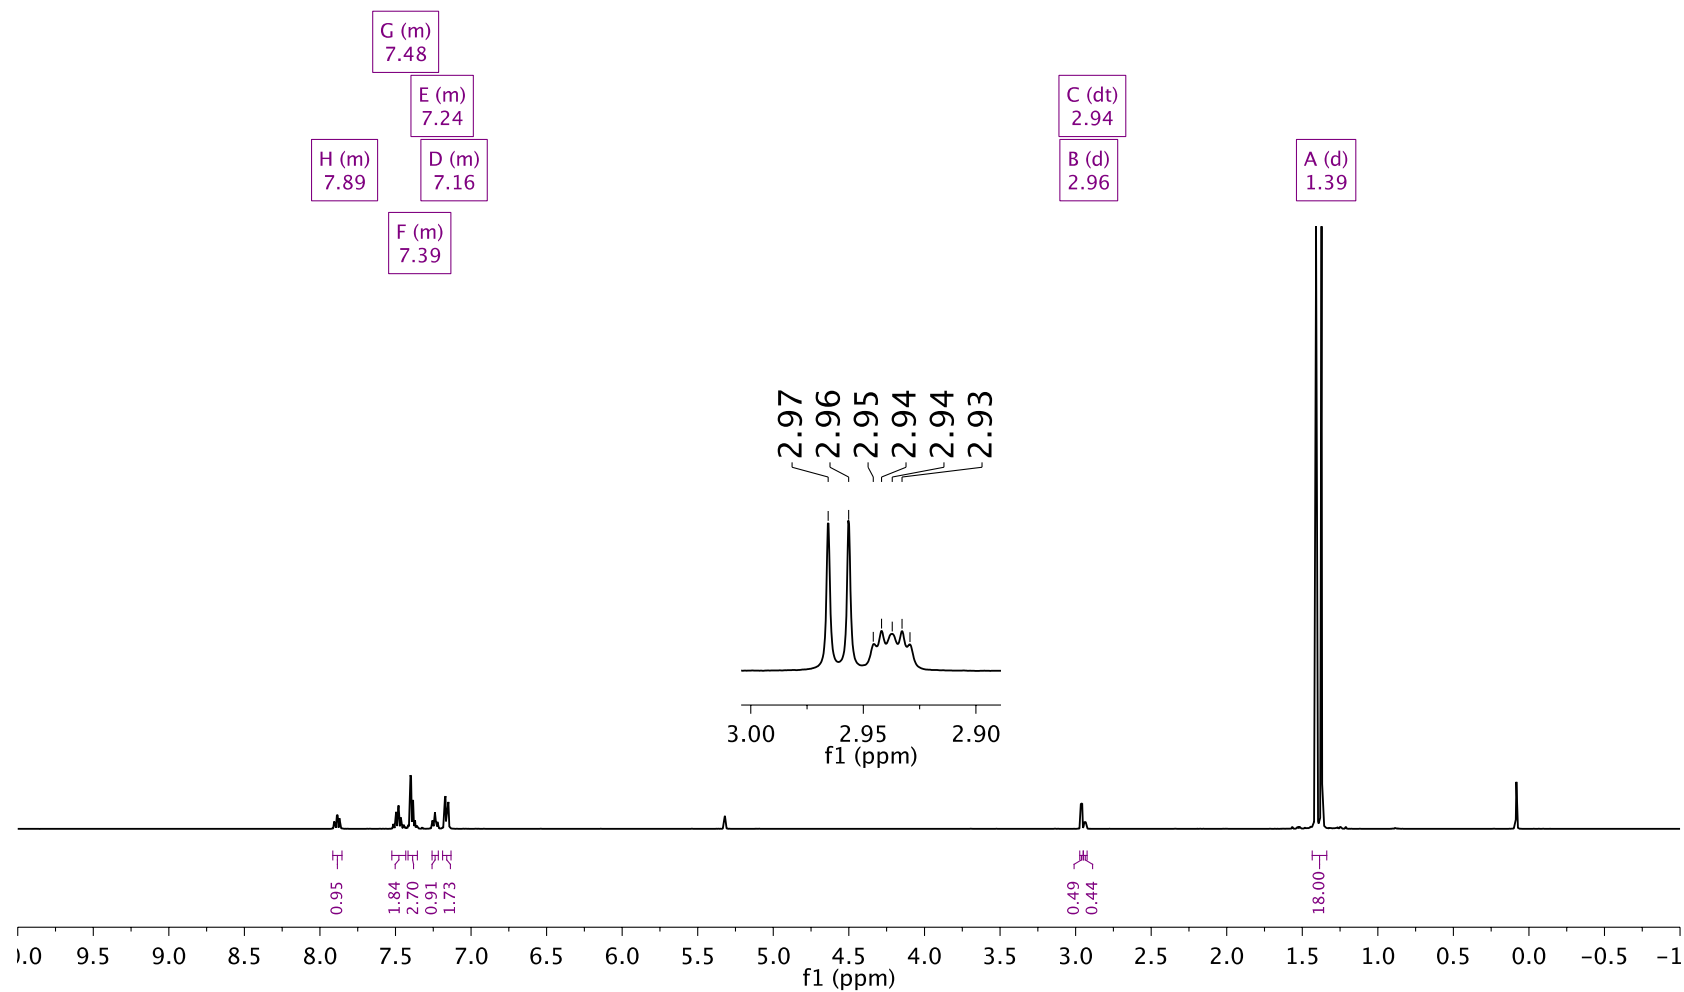

<sup>1</sup>H NMR

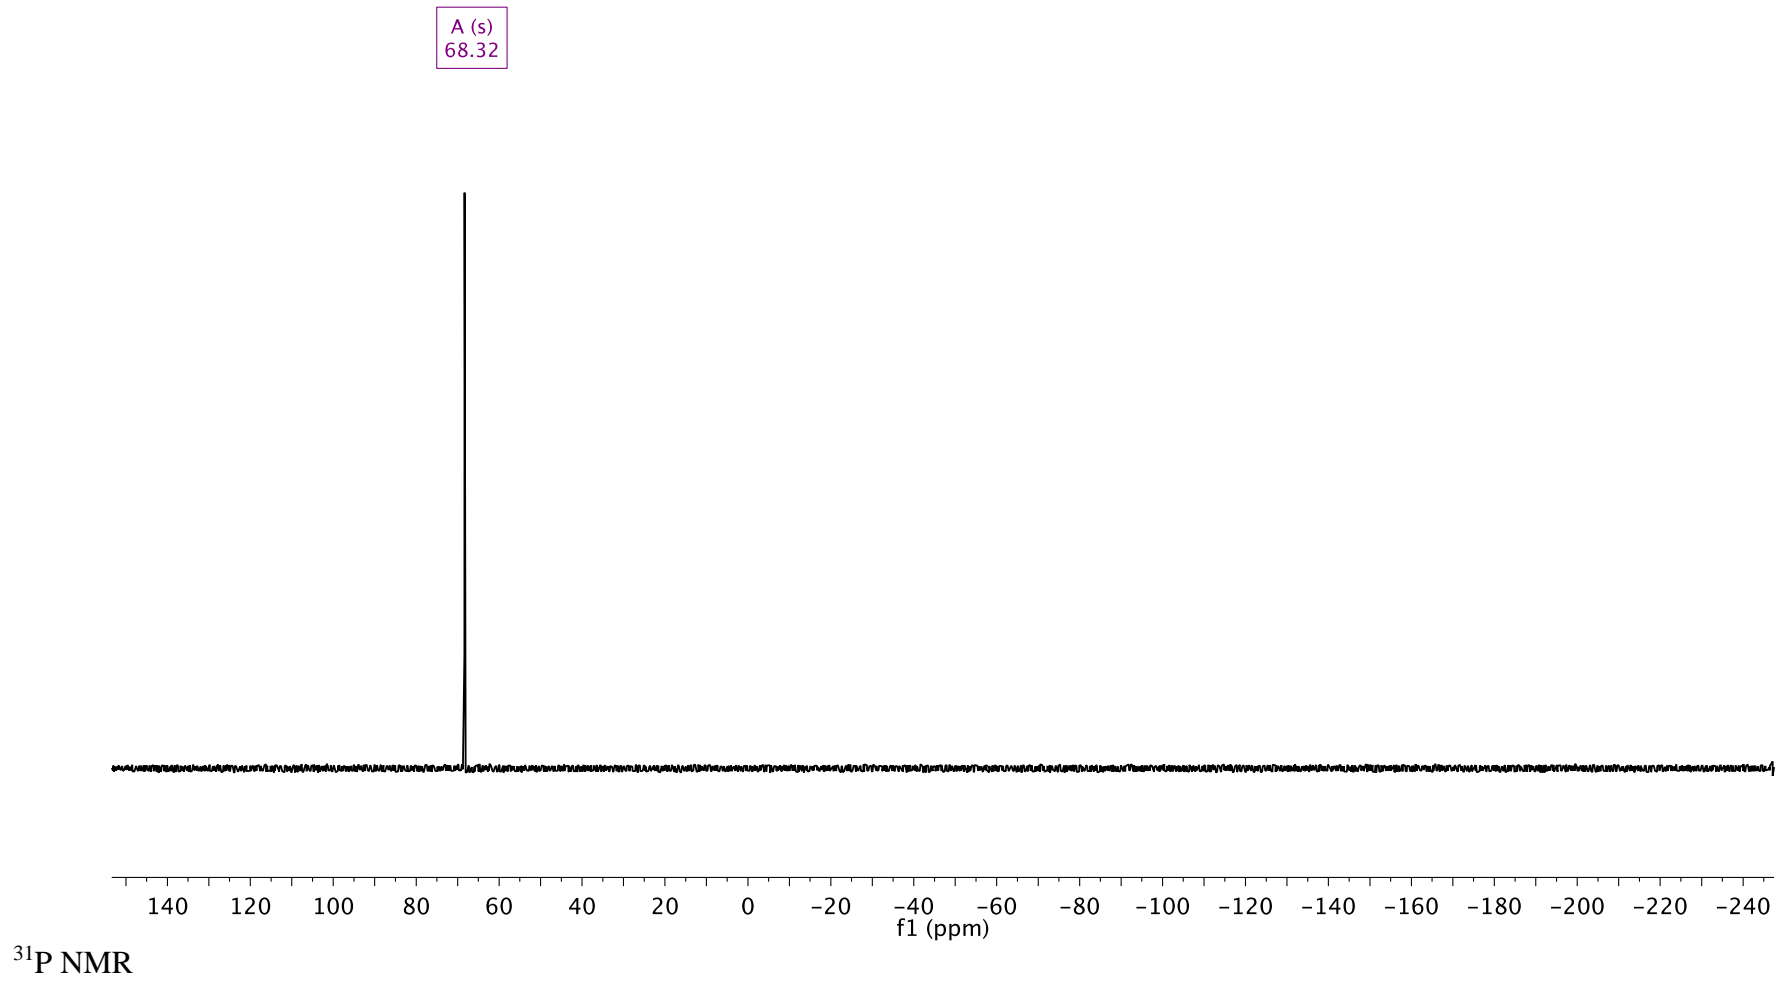

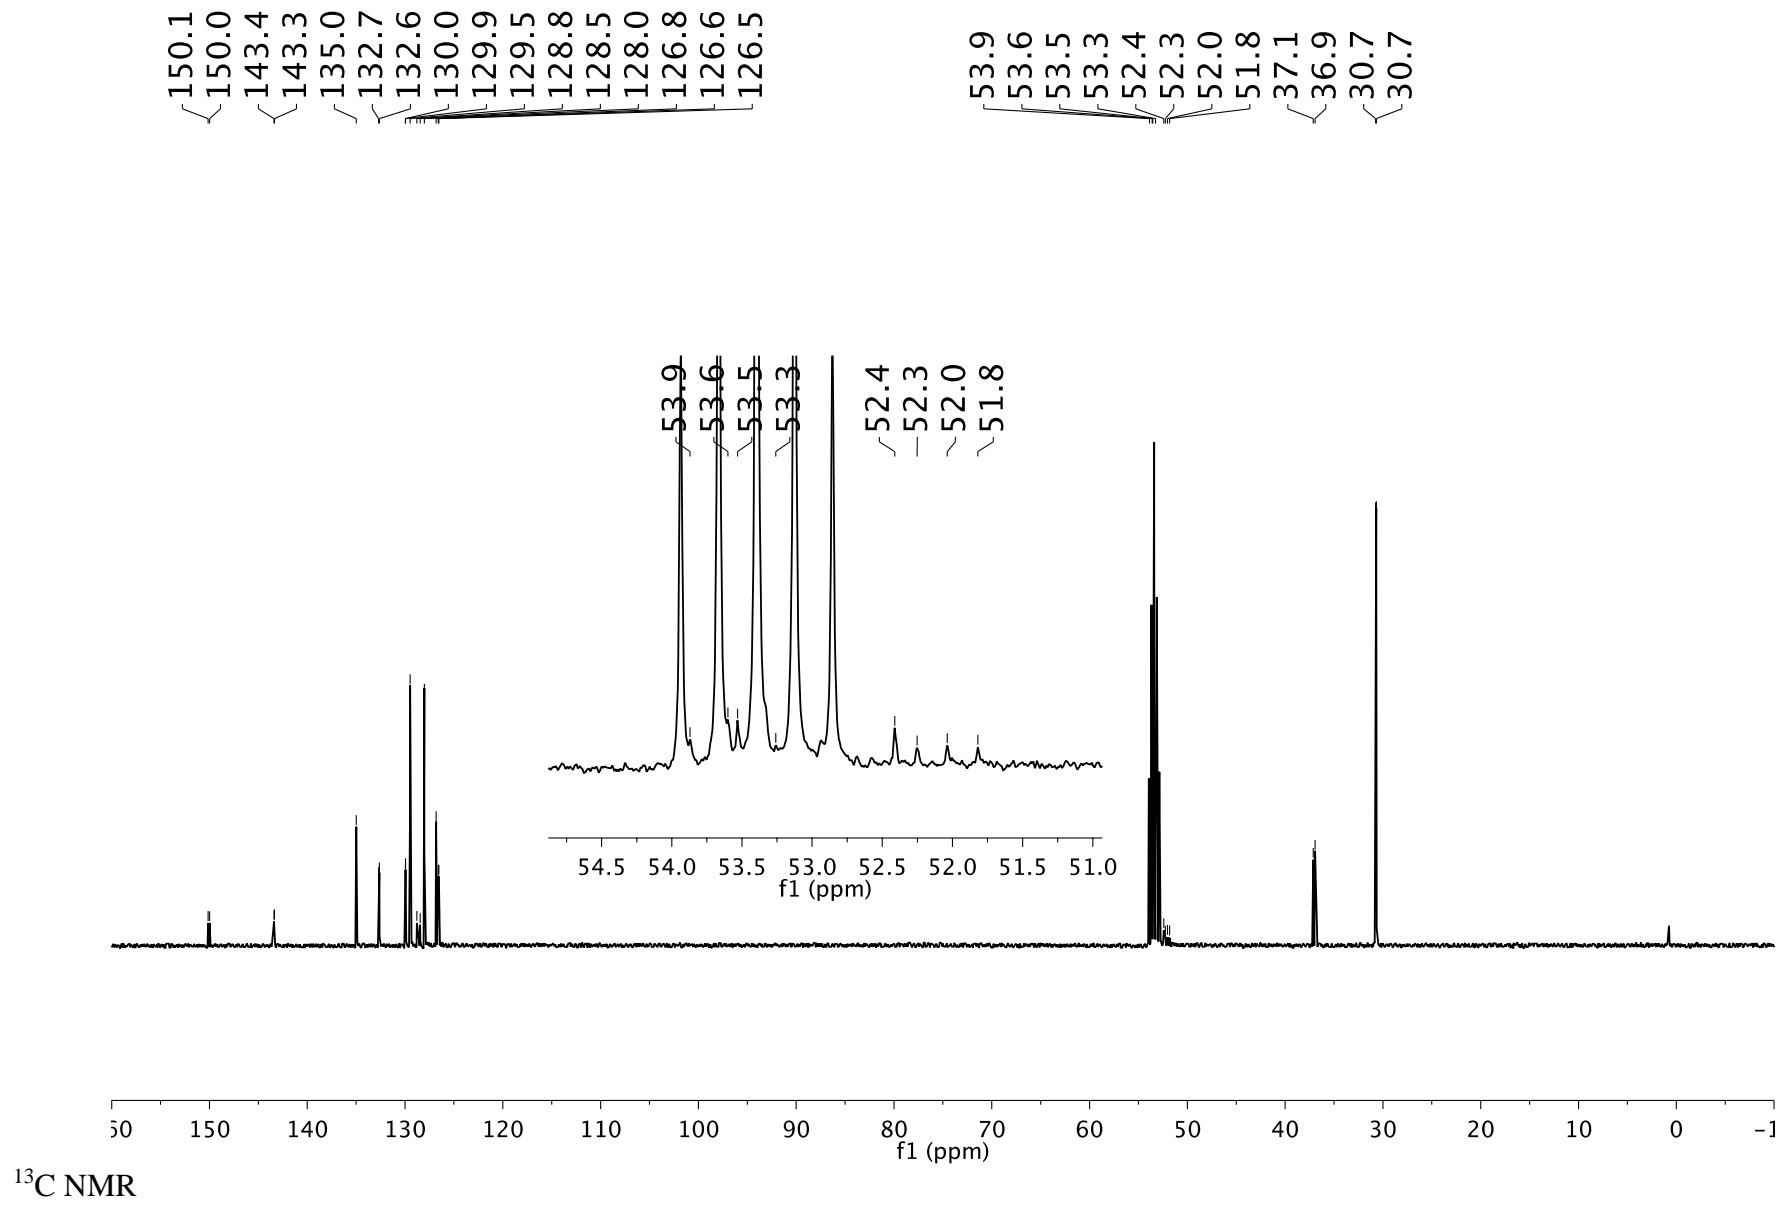

8.3. (Chloromethyl)(2-(di-*tert*-butylphosphino)-2',4',6'-triisopropylbiphenyl)gold (**1b**)

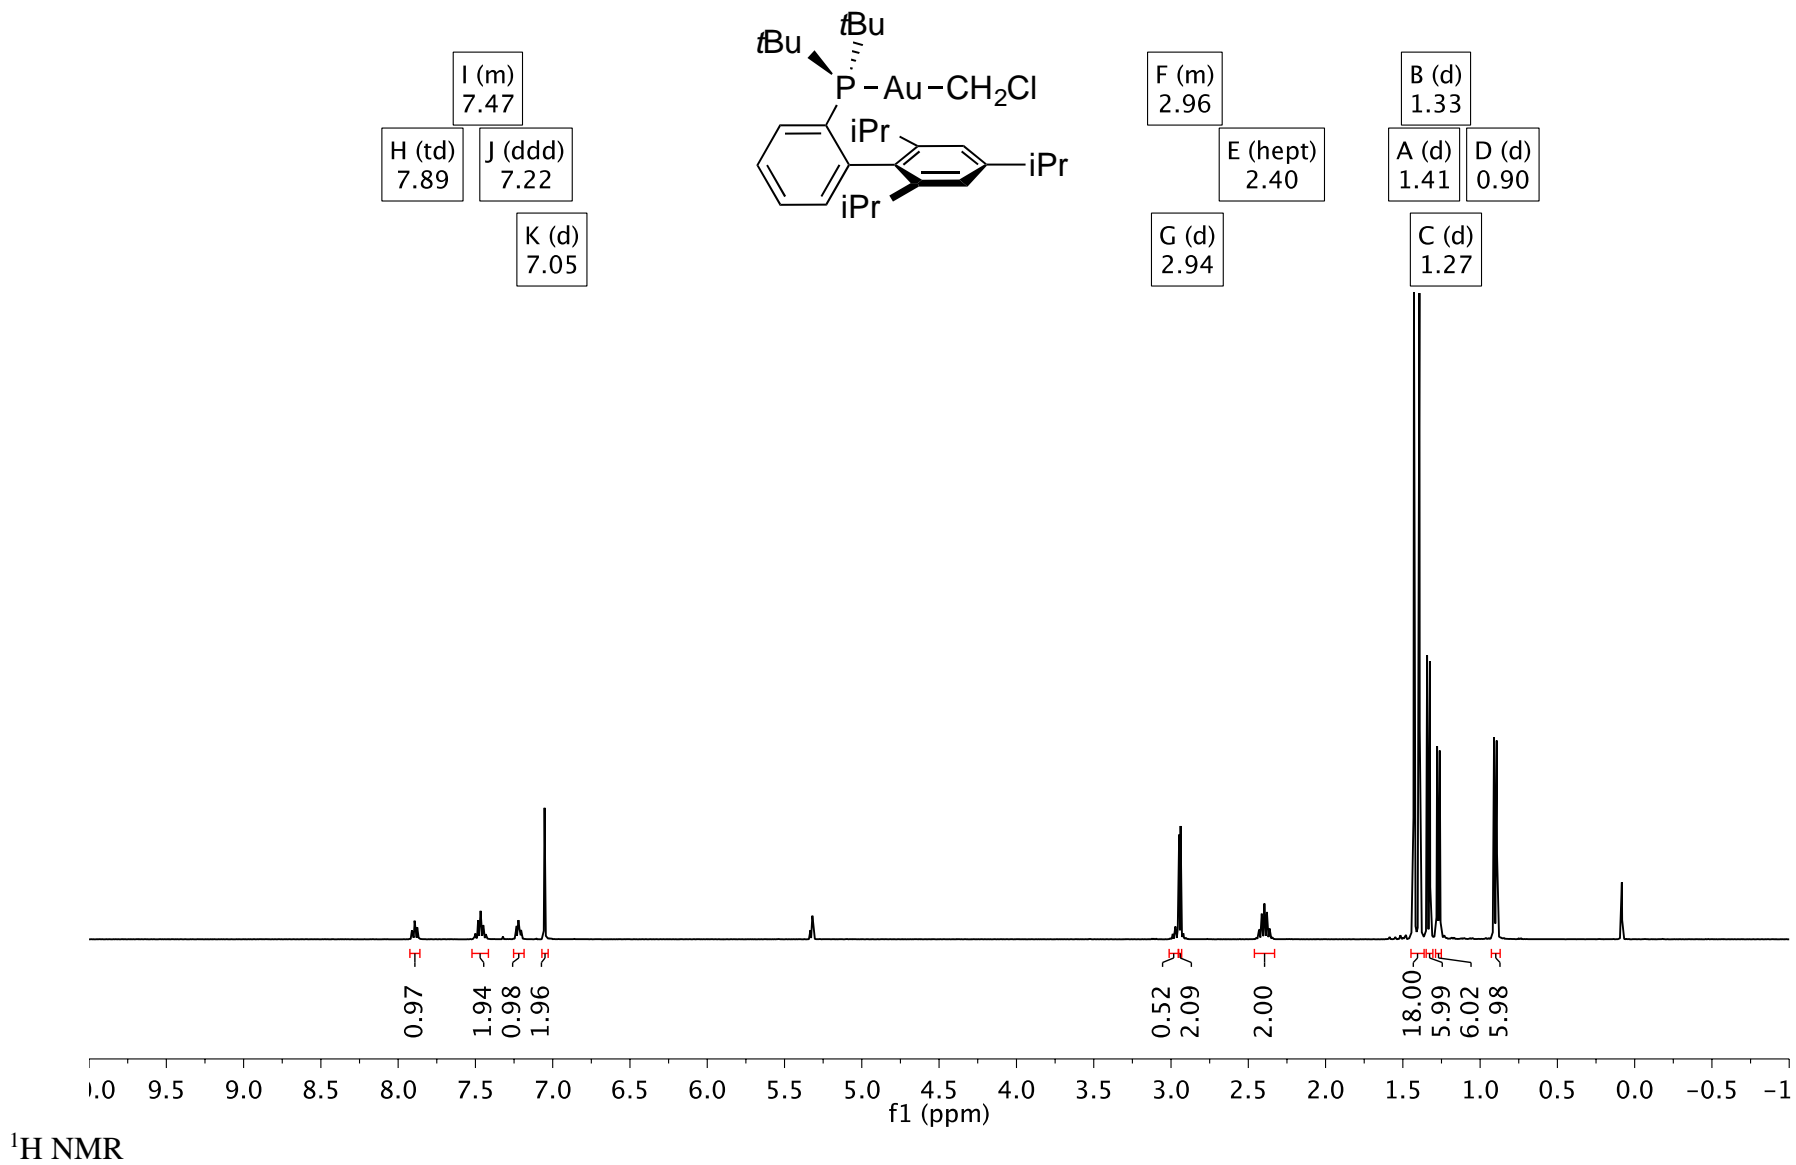

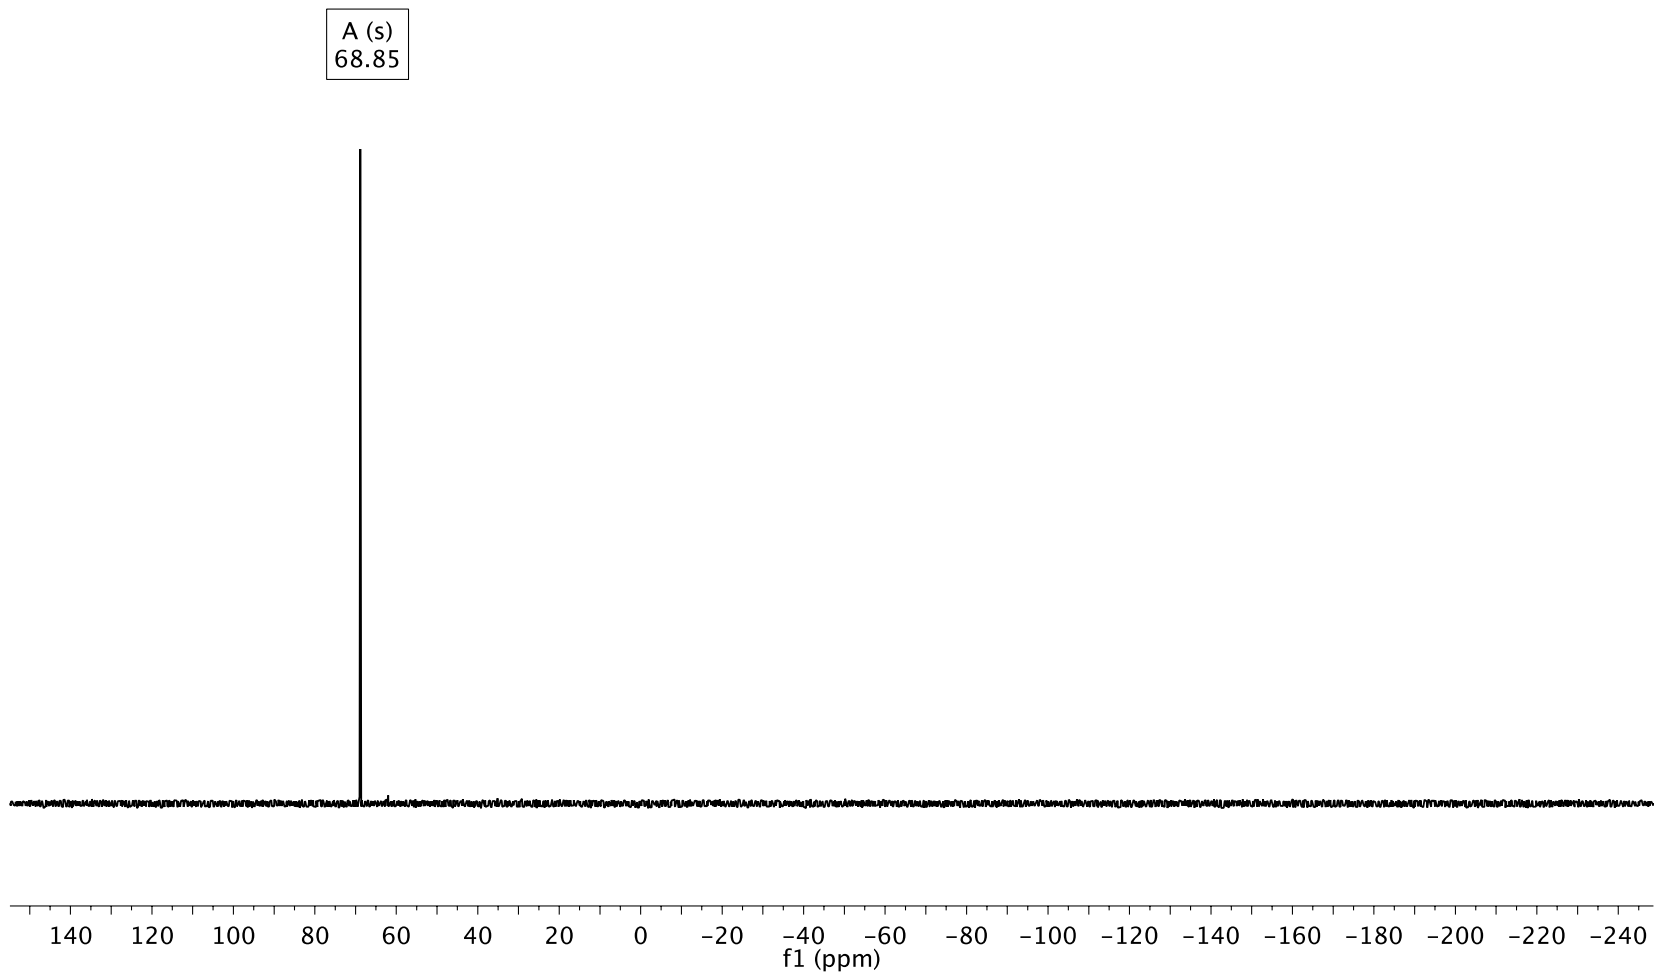

$^{31}\text{P}$  NMR



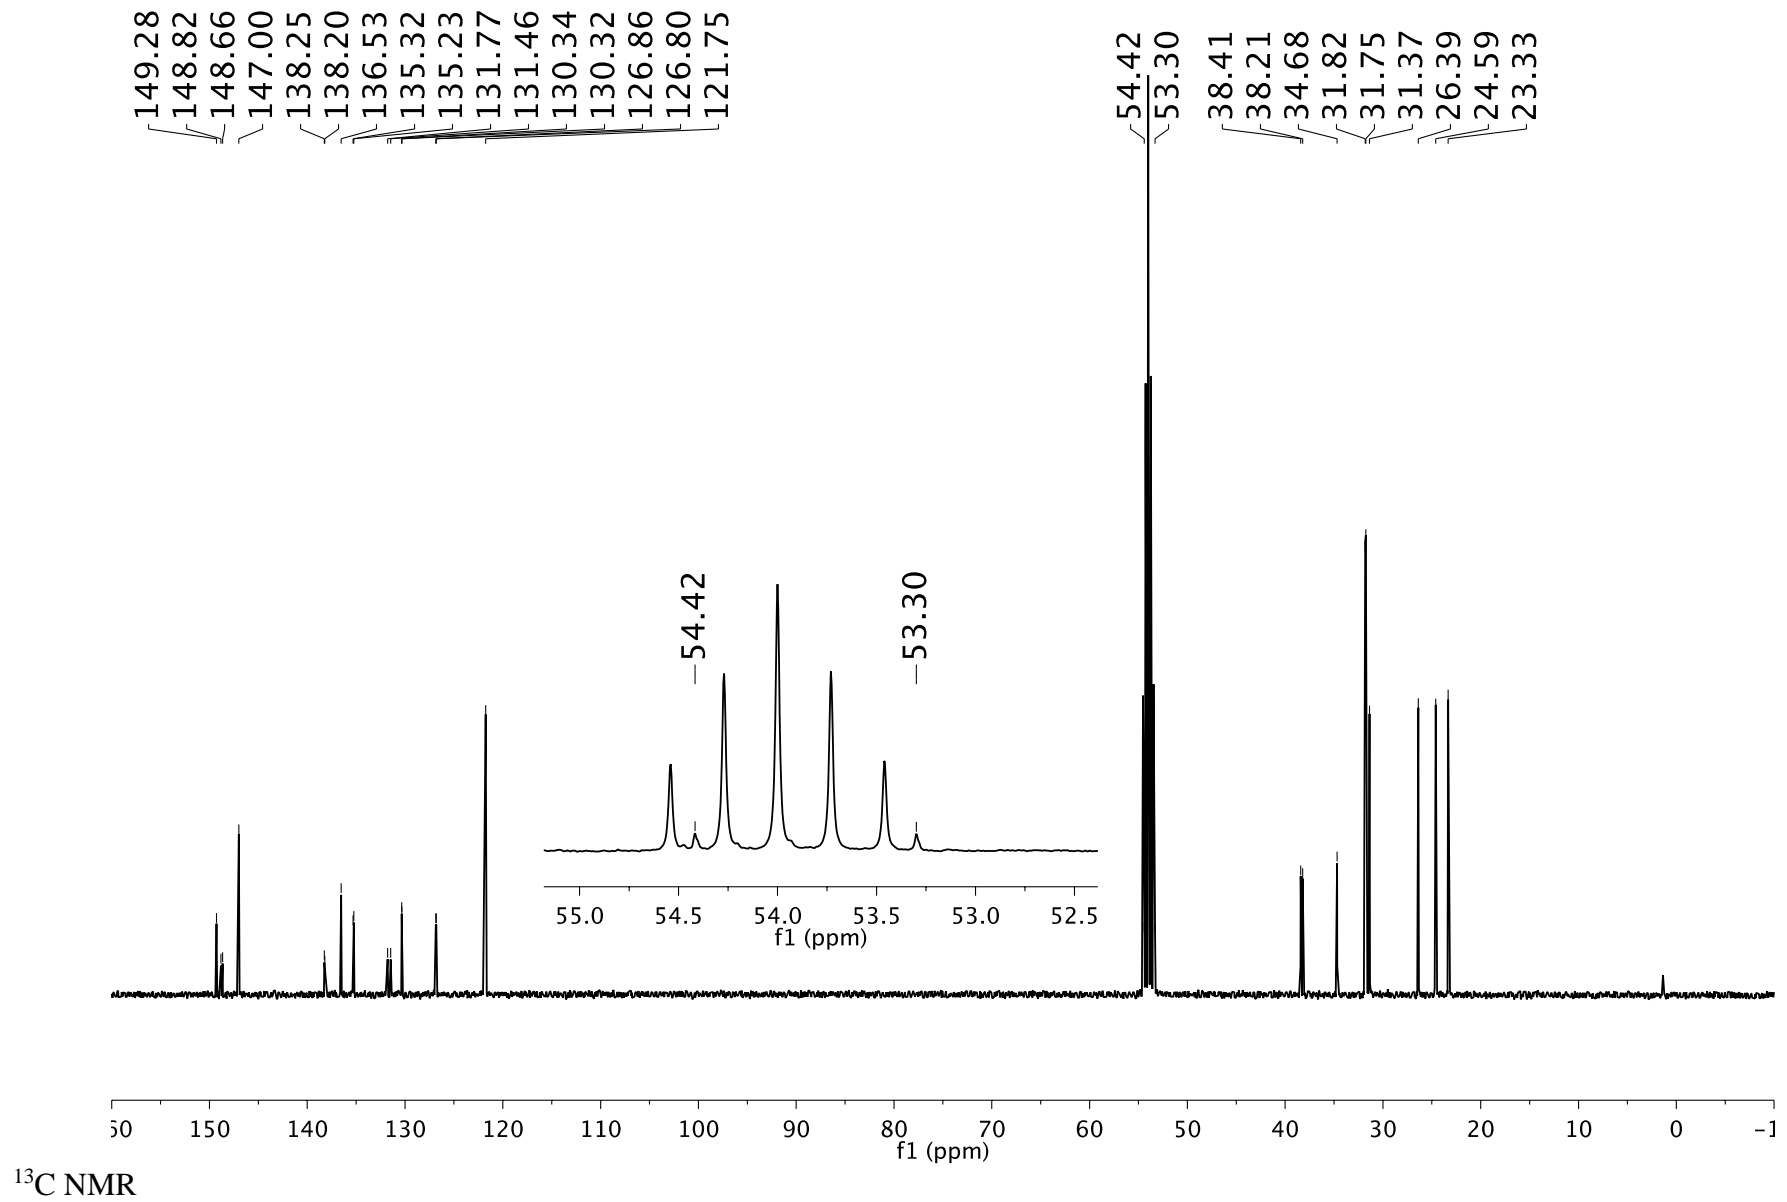

8.4. (Chloromethyl)(1,3-bis(2,6-diisopropylphenyl)imidazole-2-ylidene)gold (**1c**)

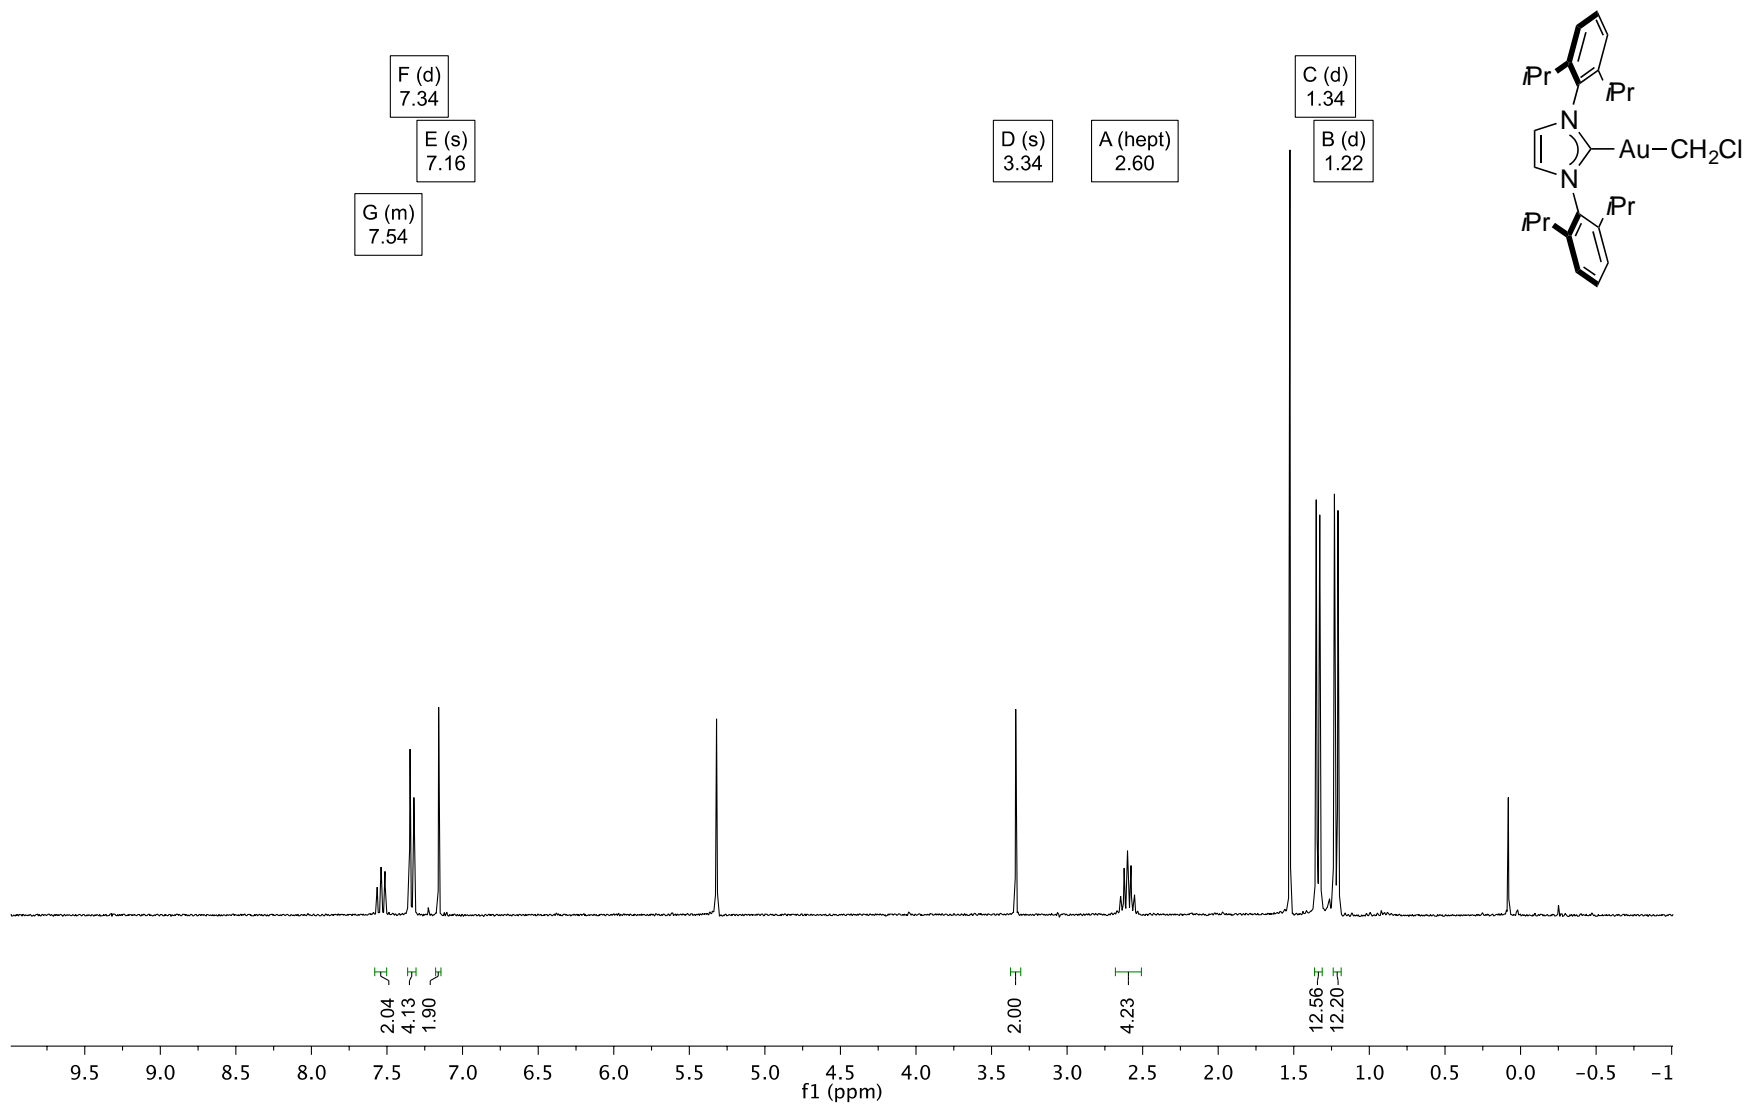

<sup>1</sup>H NMR

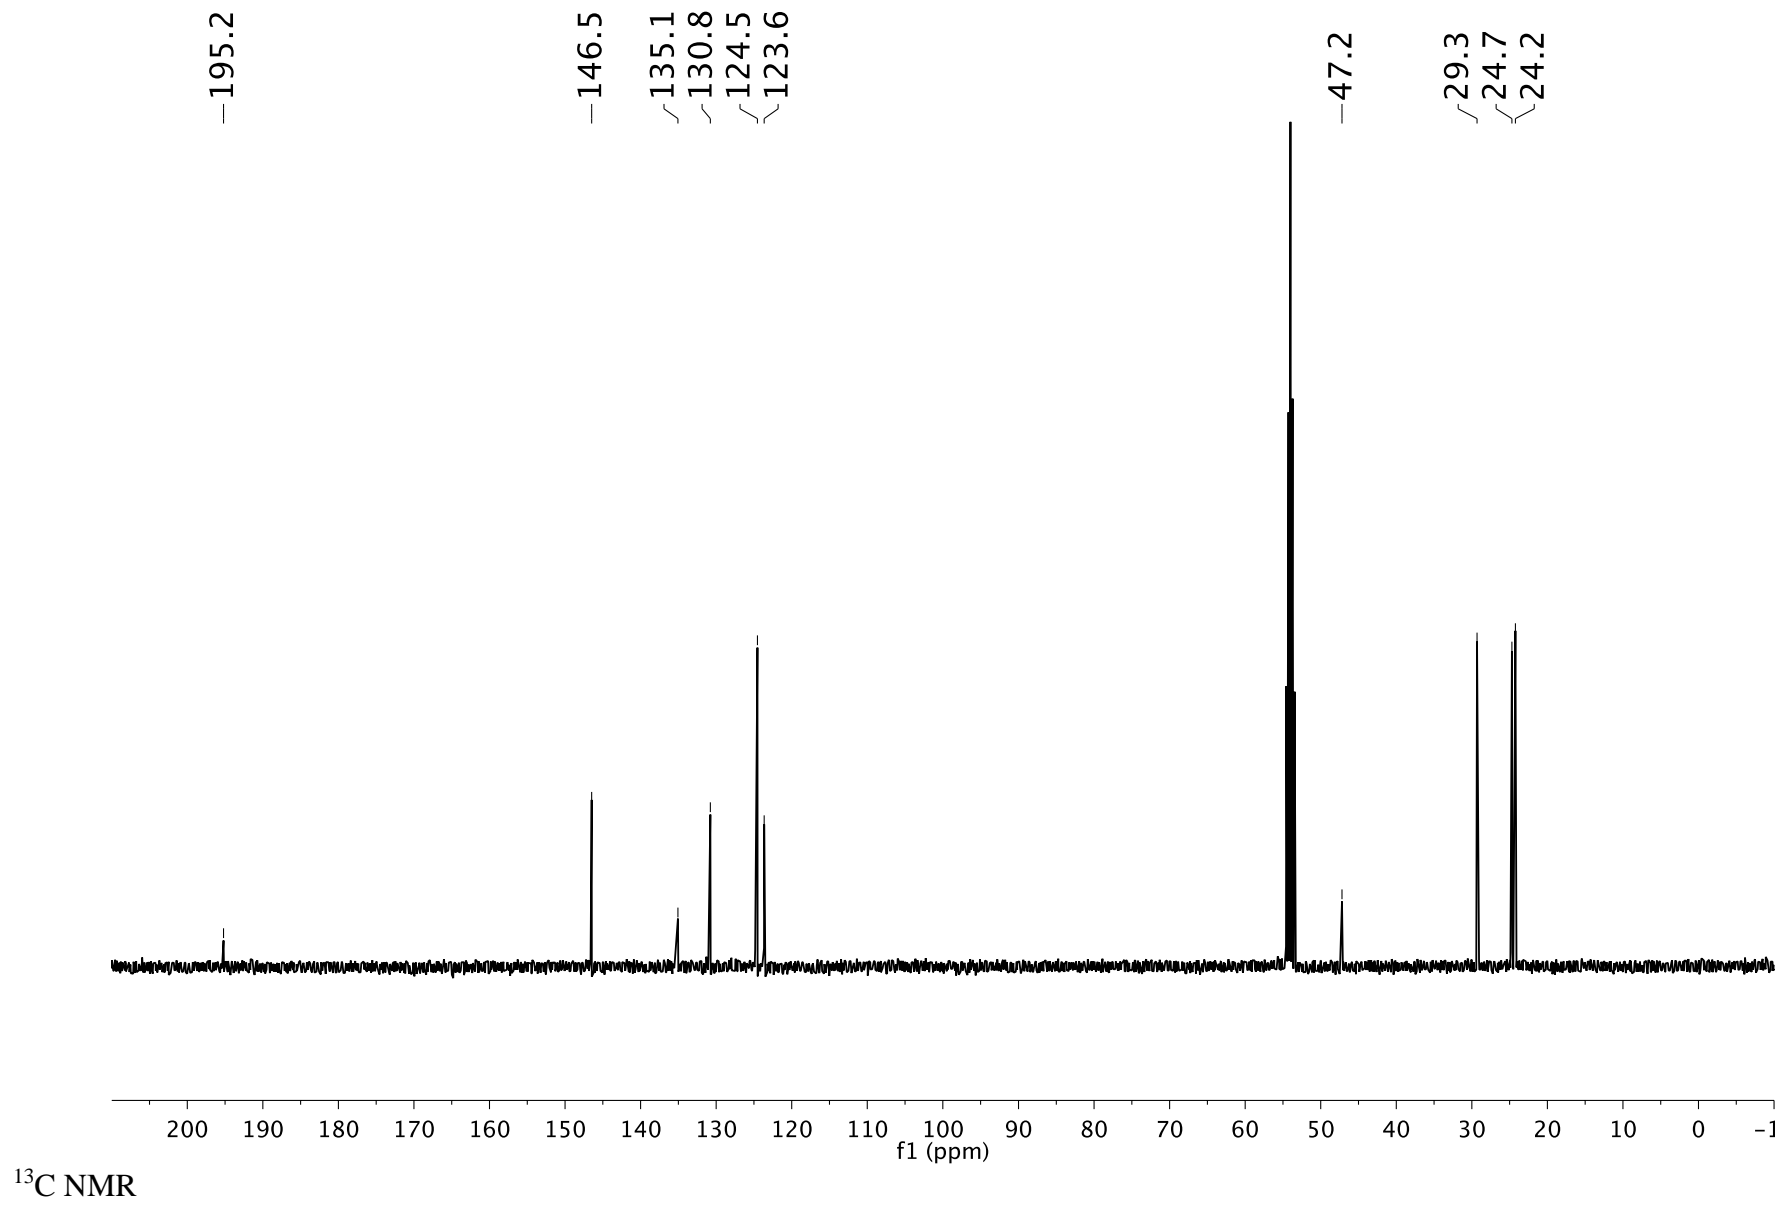

8.5. (Chloromethyl)(tris(2,4-di-tert-butylphenyl)phosphite)gold (**1d**)

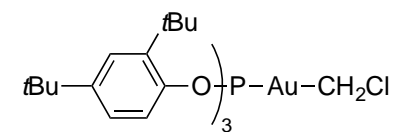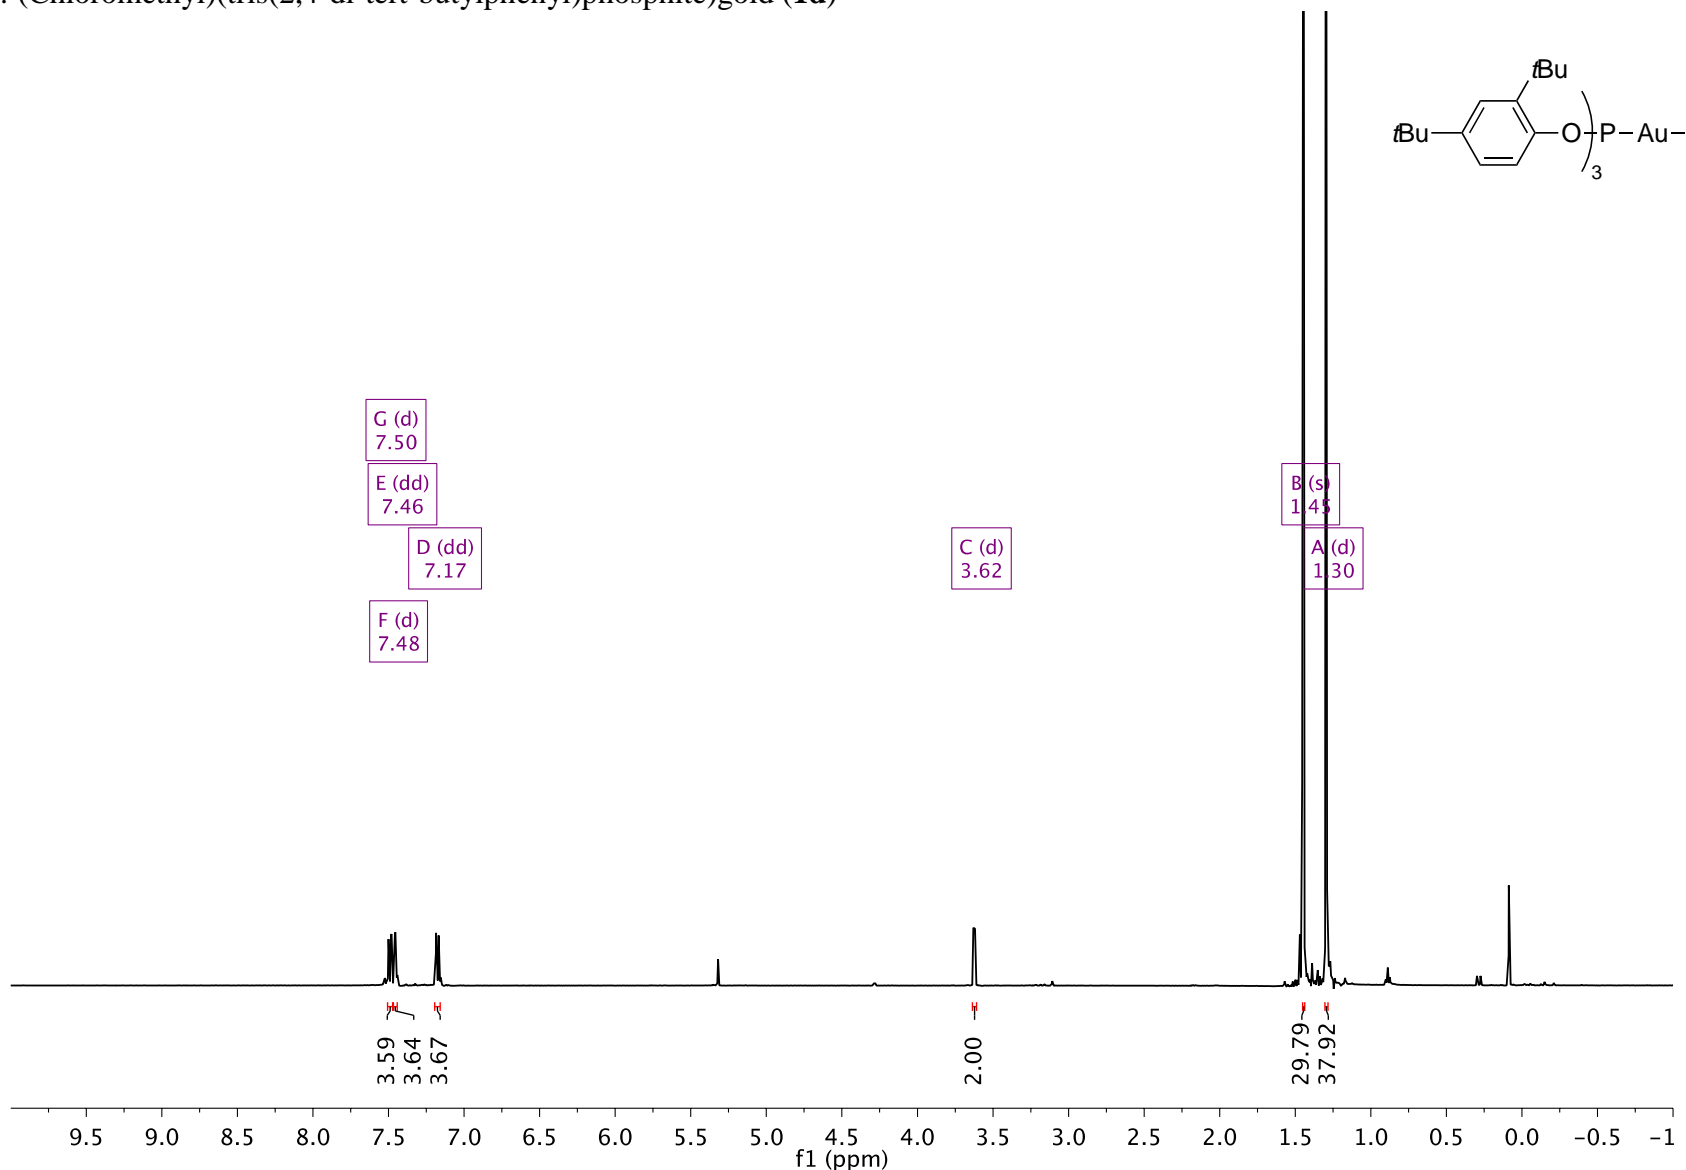

<sup>1</sup>H NMR

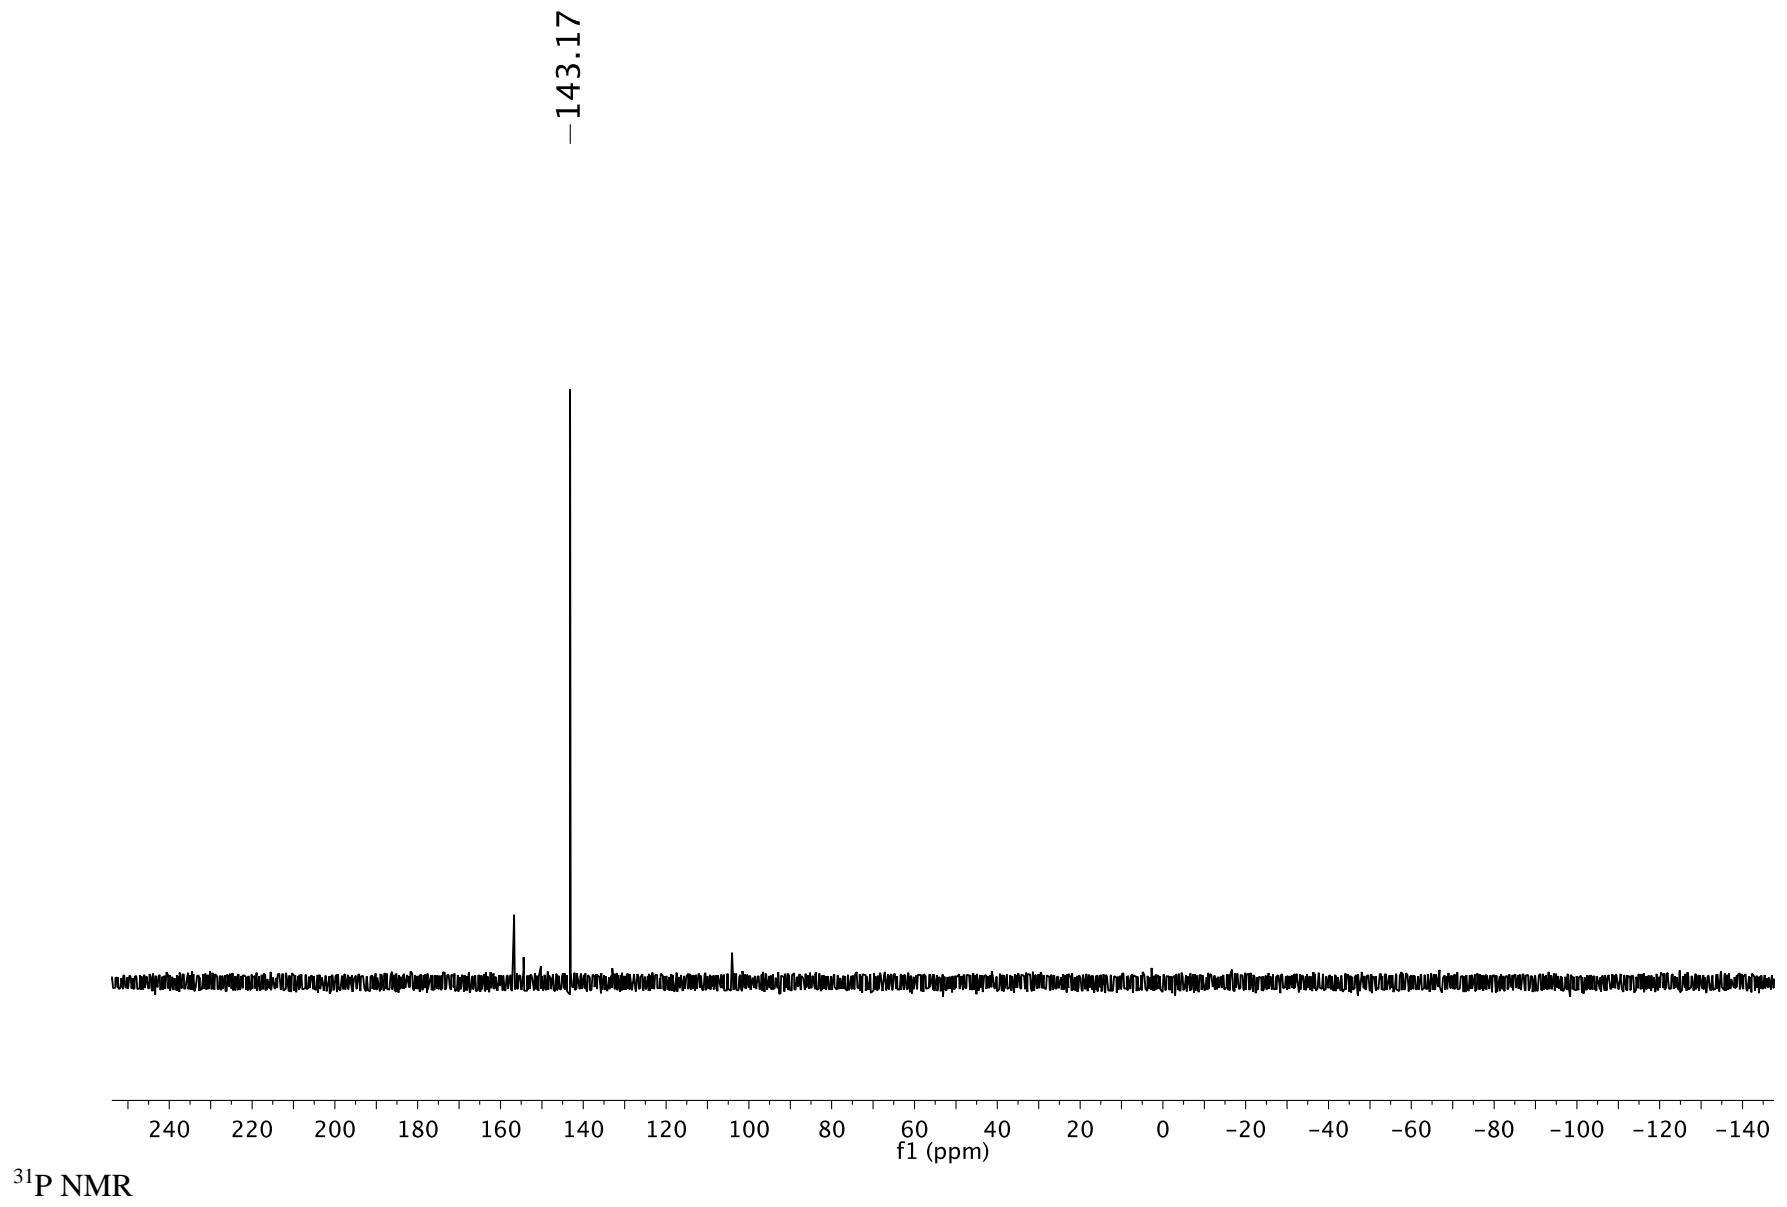

$^{31}\text{P}$  NMR

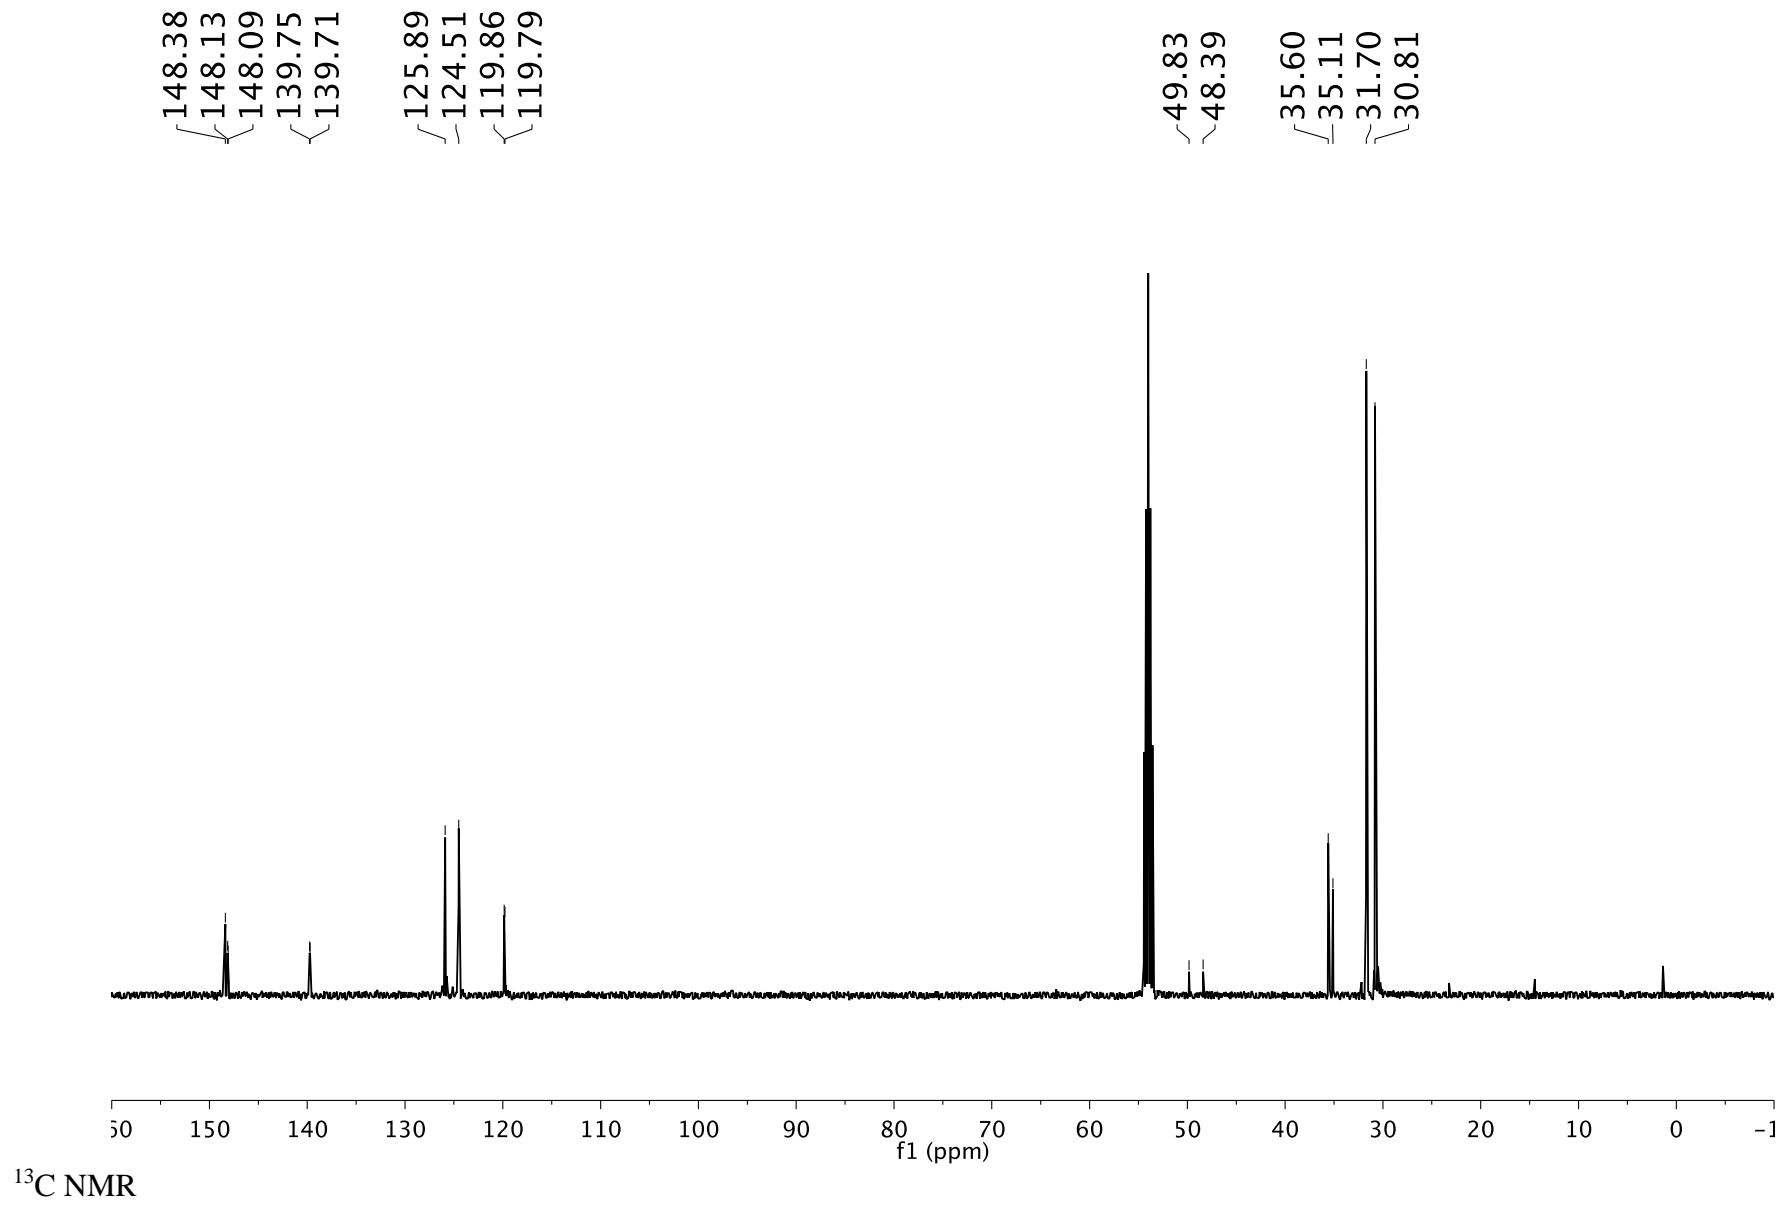

8.6. ((Tetrahydro-1*H*-furan-1-ium-1-yl)methyl)(2-(di-*tert*-butylphosphino)biphenyl)gold hexafluoroantimonate (**8**)

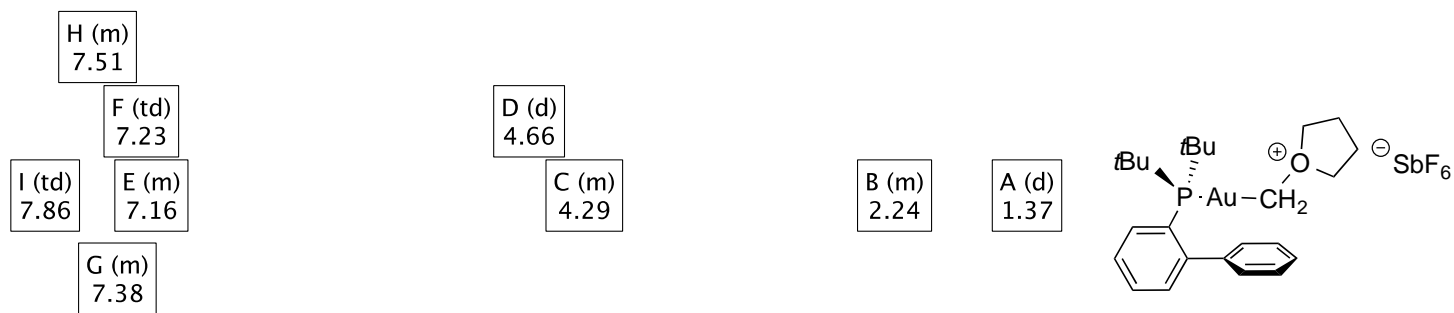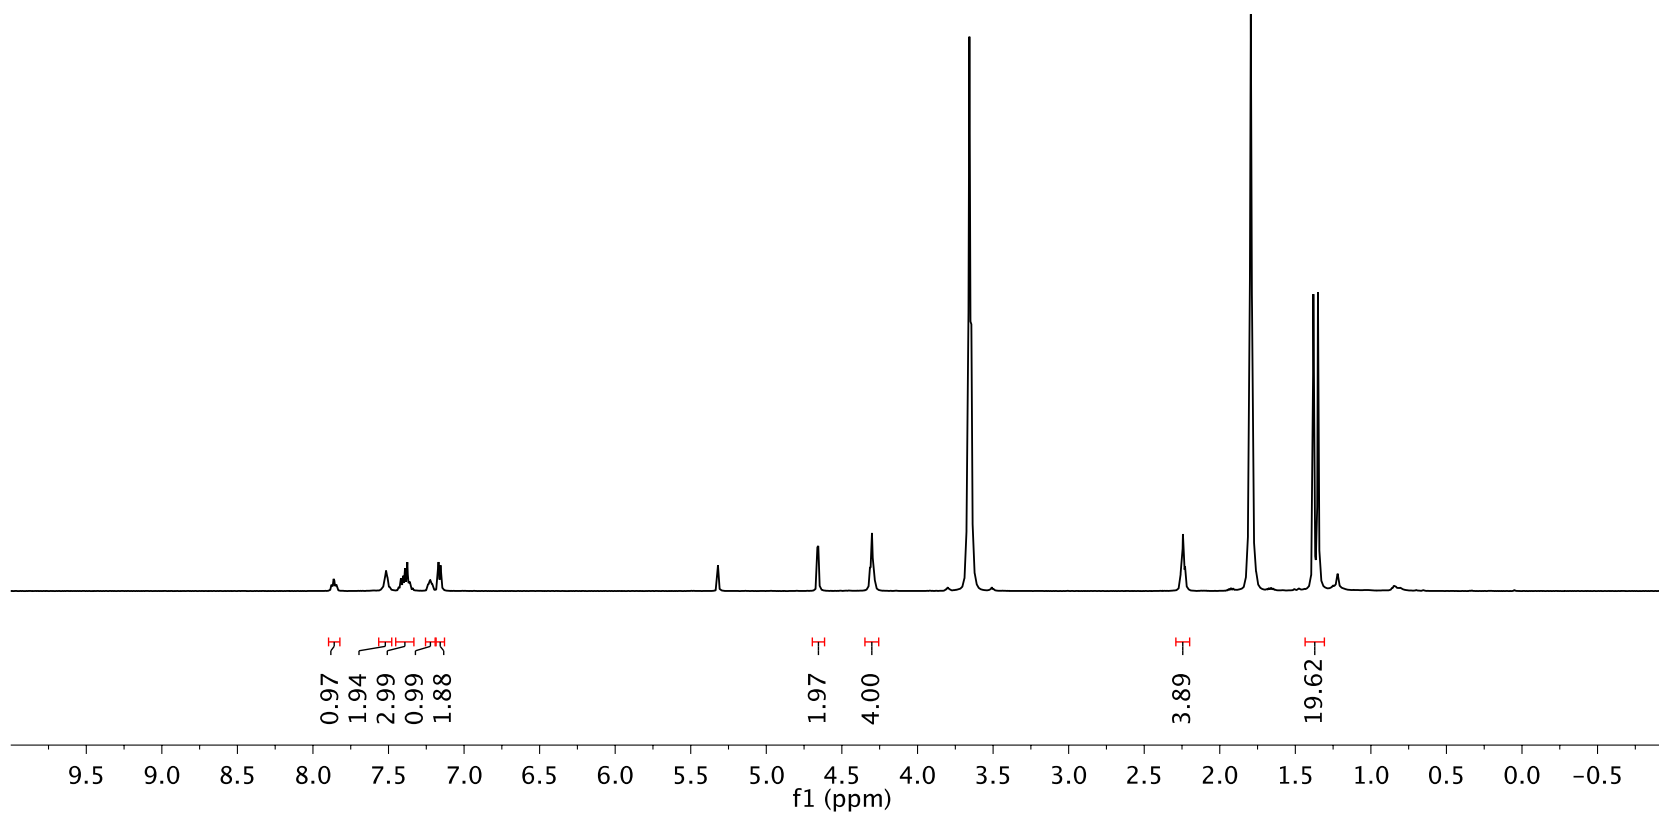

<sup>1</sup>H NMR

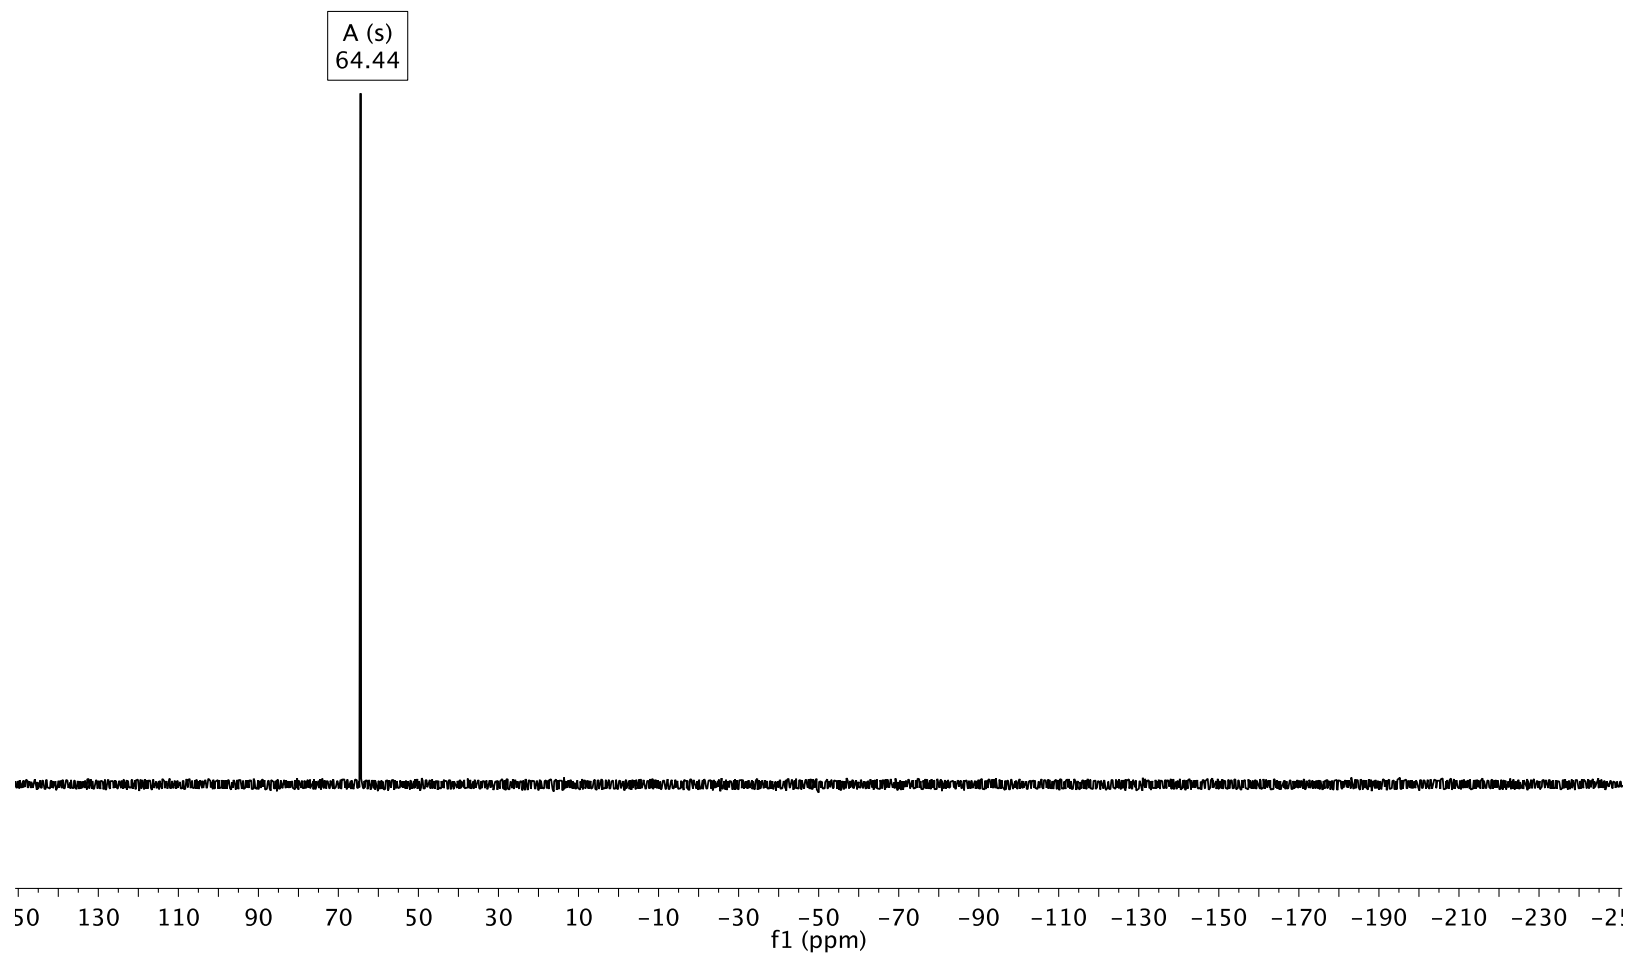

$^{31}\text{P}$  NMR



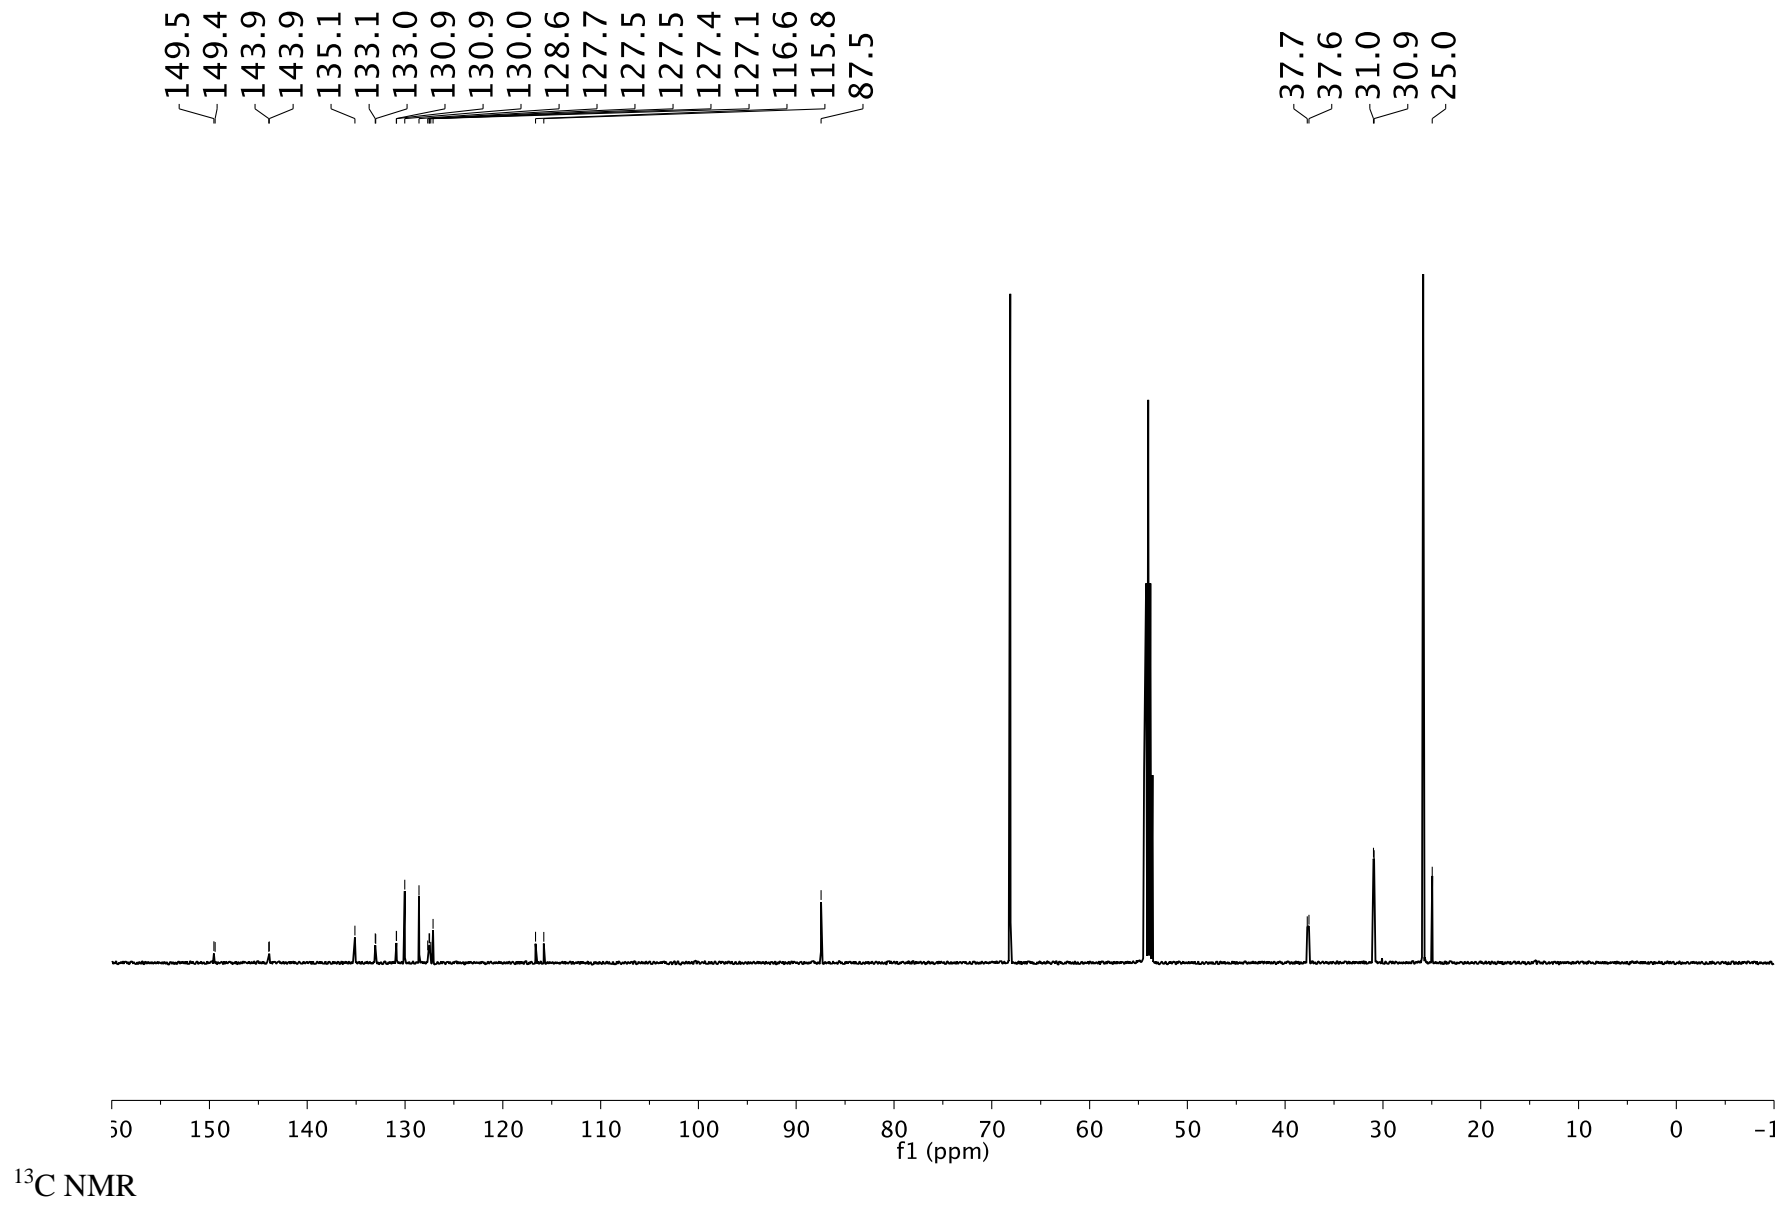

8.7. (Chloro(phenyl)methyl)(2-(di-*tert*-butylphosphino)biphenyl)gold (**9**)

<sup>1</sup>H NMR

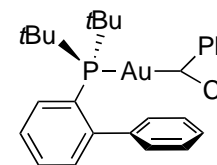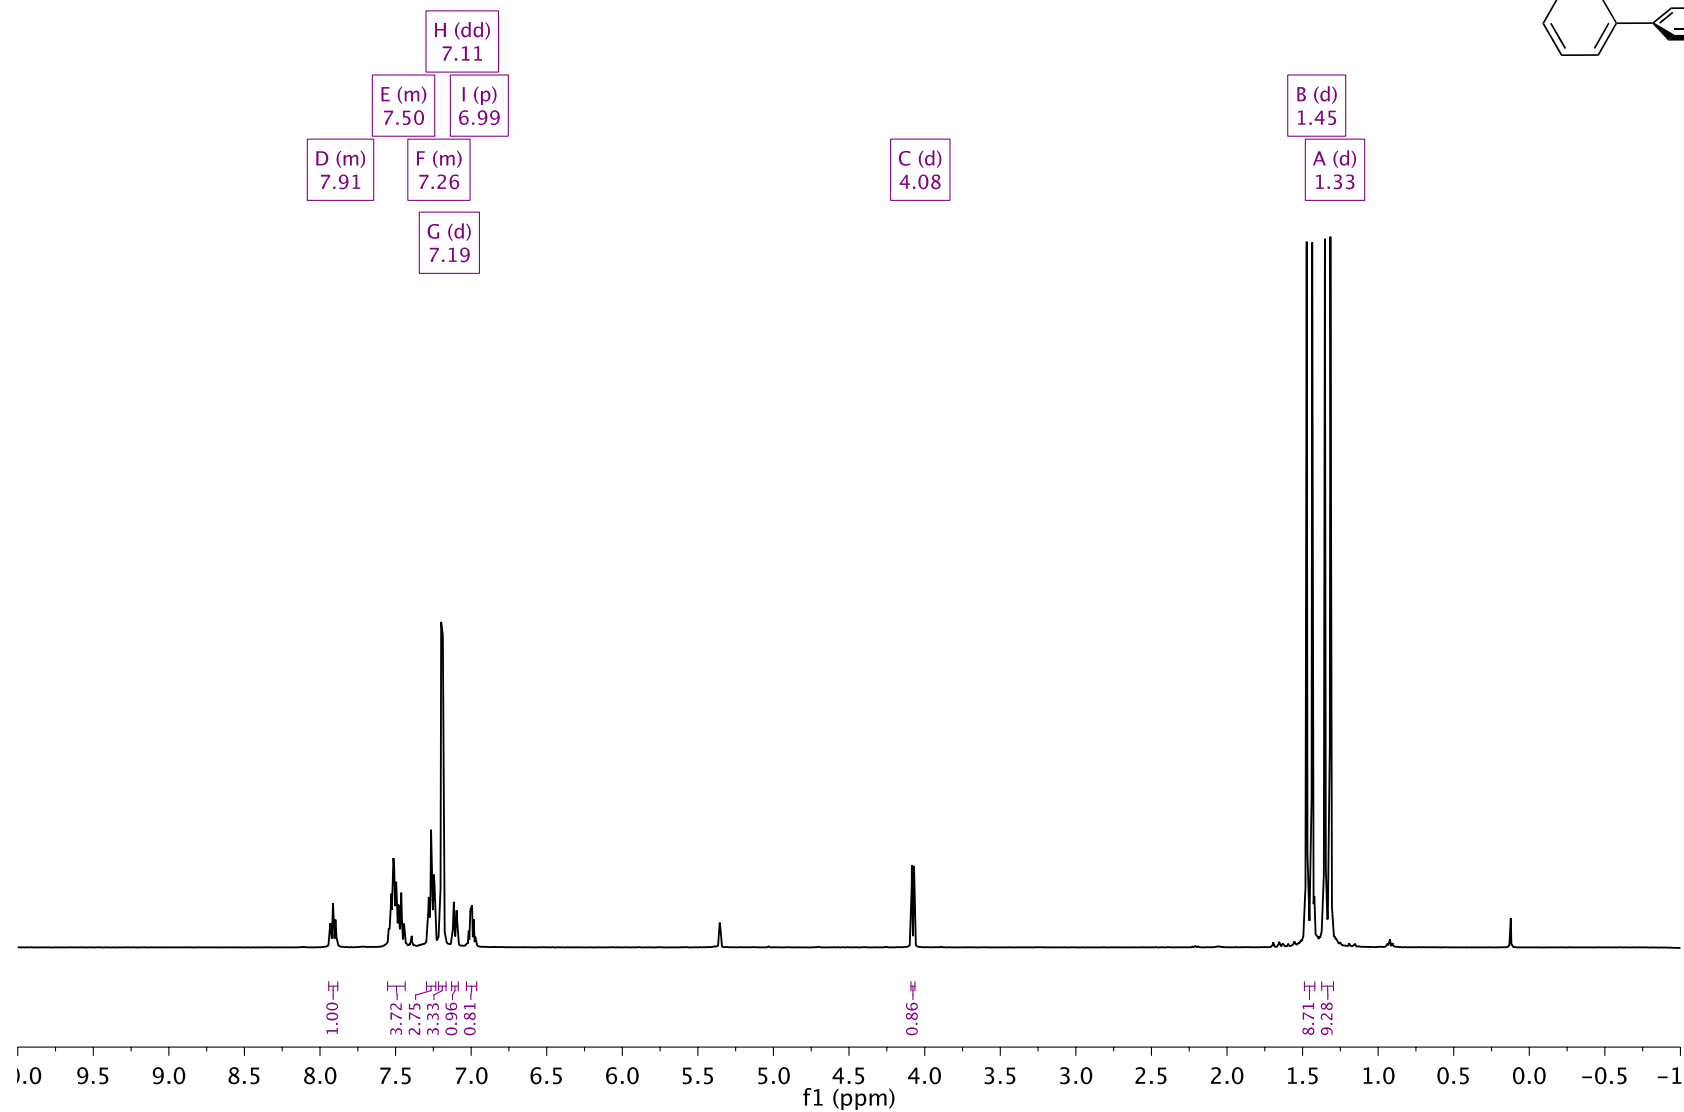

$^{31}\text{P}$  NMR

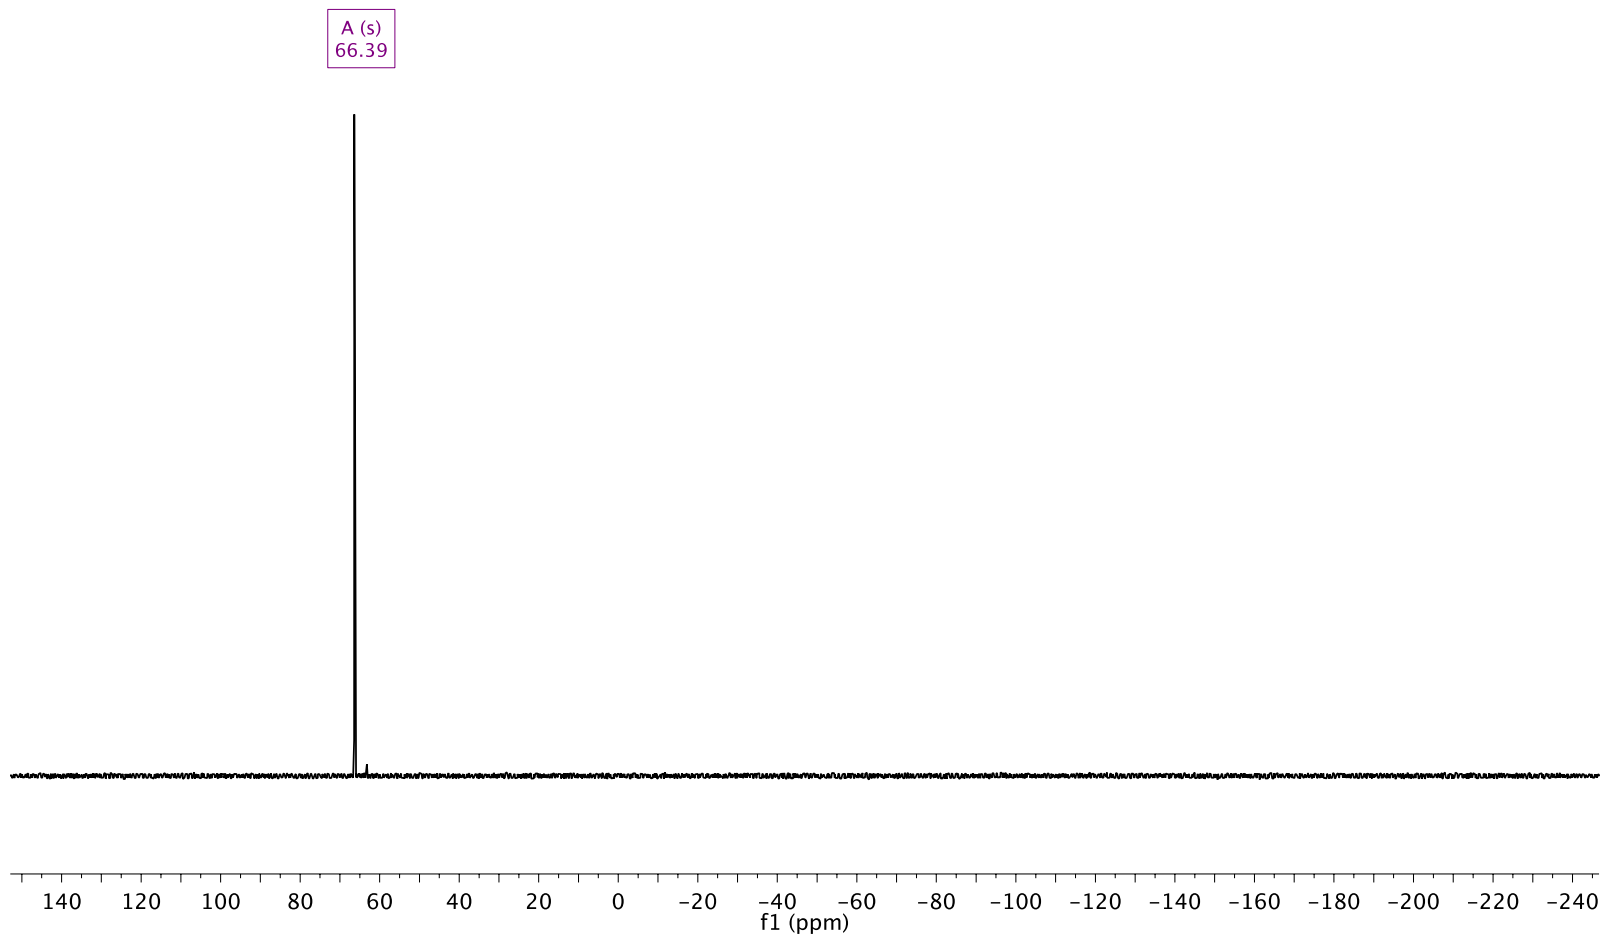

<sup>13</sup>C NMR

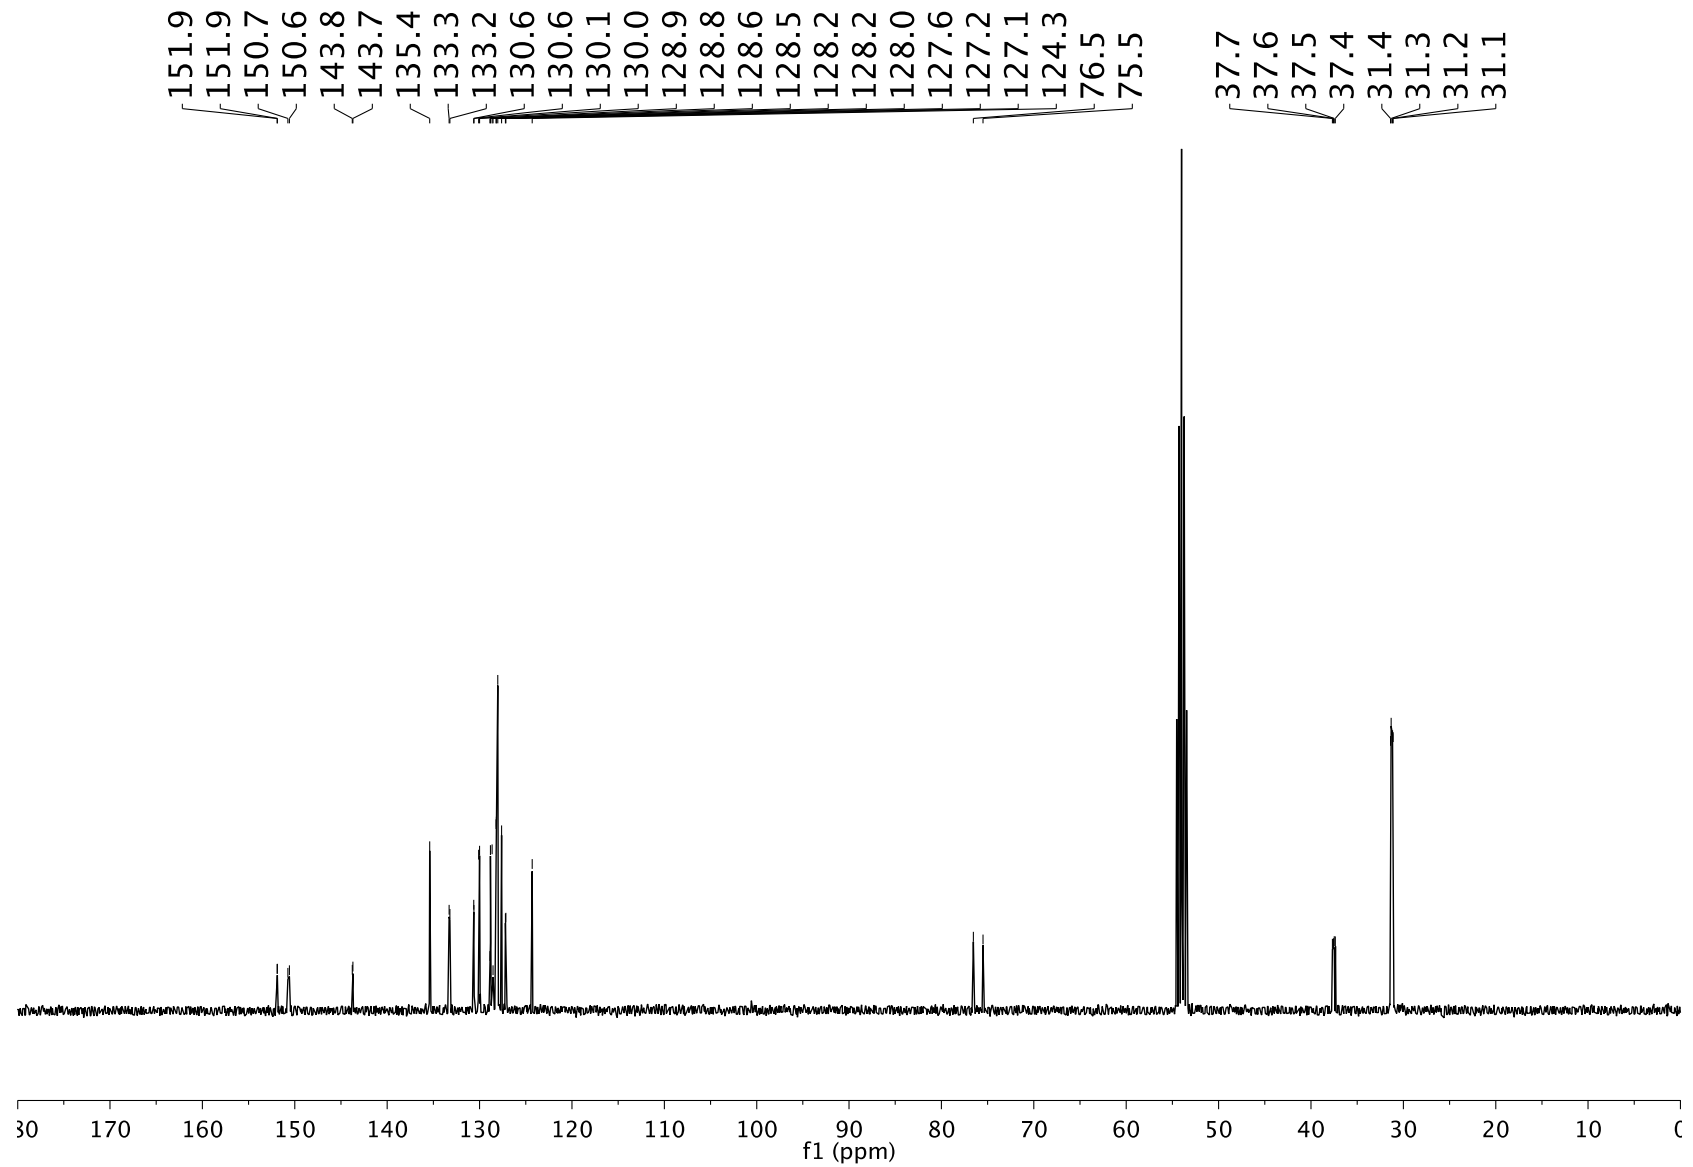

9. Mass spectrometry  
 9.1. ESI-MS spectra of **1a**

## Mass Spectrum SmartFormula Report

### Analysis Info

Analysis Name W:\Data\160610\160610\_CGJS190-1\_RE3\_01\_10680.d  
 Method tune\_low\_hplc-exactas3min-noe.m  
 Sample Name 160610\_CGJS190-1  
 Comment 0.5 uL starting sol, MeOH injection, END PLATE. -700V

Acquisition Date 10/06/2016 14:29:32  
 Operator ICIQ  
 Instrument / Ser# micrOTOF 213750.10  
 394

### Acquisition Parameter

|             |          |                      |          |                  |           |
|-------------|----------|----------------------|----------|------------------|-----------|
| Source Type | ESI      | Ion Polarity         | Positive | Set Nebulizer    | 1.2 Bar   |
| Focus       | Active   |                      |          | Set Dry Heater   | 180 °C    |
| Scan Begin  | 50 m/z   | Set Capillary        | 4500 V   | Set Dry Gas      | 8.0 l/min |
| Scan End    | 2000 m/z | Set End Plate Offset | -700 V   | Set Divert Valve | Source    |

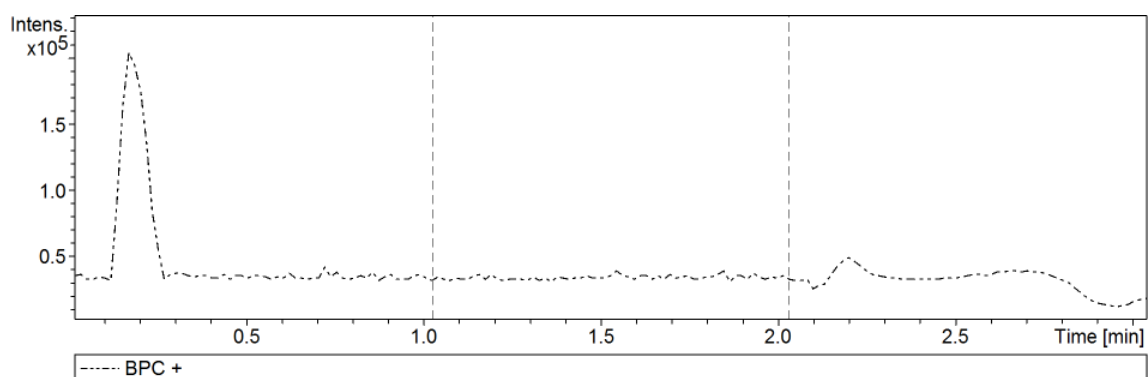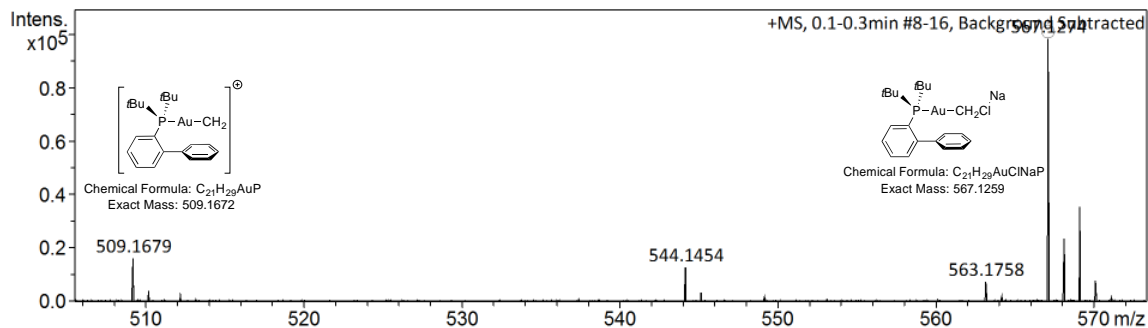

Supplement: ANIE-56-1859-s001.pdf [file ANIE-56-1859-s001.pdf]
